# Supplementary material for: A systematic review of the effect of red blood cell transfusion on mortality: evidence from large-scale observational studies published between 2006 and 2010
Source: PubMed Central journal article supplement — BMJ Open. 2013 May 2;3(5):e002154. doi: 10.1136/bmjopen-2012-002154 (PMC3646177; doi:10.1136/bmjopen-2012-002154), 2013-05-02
Supplement: bmjopen-2012-002154.draft_revisions.pdf [file bmjopen-2012-002154.draft_revisions.pdf]

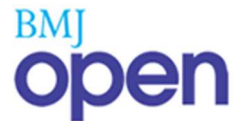

**Time to act on evidence from recent large scale observational studies of the efficacy of red blood cell transfusion? Insights from a systematic review**

|                                 |                                                                                                                                                                                                                                                                                                                                                                                                                                                |
|---------------------------------|------------------------------------------------------------------------------------------------------------------------------------------------------------------------------------------------------------------------------------------------------------------------------------------------------------------------------------------------------------------------------------------------------------------------------------------------|
| Journal:                        | <i>BMJ Open</i>                                                                                                                                                                                                                                                                                                                                                                                                                                |
| Manuscript ID:                  | bmjopen-2012-002154                                                                                                                                                                                                                                                                                                                                                                                                                            |
| Article Type:                   | Research                                                                                                                                                                                                                                                                                                                                                                                                                                       |
| Date Submitted by the Author:   | 24-Sep-2012                                                                                                                                                                                                                                                                                                                                                                                                                                    |
| Complete List of Authors:       | Hopewell, Sally; University of Oxford, Centre for Statistics in Medicine<br>Omar, Omar; University of Oxford, Centre for Statistics in Medicine<br>Yu, Ly-Mee; University of Oxford, Centre for Statistics in Medicine<br>Hyde, Chris; University of Exeter, Peninsula College of Medicine & Dentistry<br>Doree, Carolyn; John Radcliffe Hospital, NHS Blood and Transplant<br>Murphy, Mike; John Radcliffe Hospital, NHS Blood and Transplant |
| <b>Primary Subject Heading</b>: | Evidence based practice                                                                                                                                                                                                                                                                                                                                                                                                                        |
| Secondary Subject Heading:      | Haematology (incl blood transfusion)                                                                                                                                                                                                                                                                                                                                                                                                           |
| Keywords:                       | EPIDEMIOLOGY, Blood bank & transfusion medicine < HAEMATOLOGY, INTENSIVE & CRITICAL CARE                                                                                                                                                                                                                                                                                                                                                       |
|                                 |                                                                                                                                                                                                                                                                                                                                                                                                                                                |

SCHOLARONE™  
Manuscripts

1  
2  
3  
4  
5  
6  
7  
8 **Time to act on evidence from recent large scale observational studies**  
9  
10 **of the efficacy of red blood cell transfusion? Insights from a systematic**  
11 **review**  
12  
13  
14  
15  
16  
17  
18  
19  
20  
21  
22

23 Sally Hopewell<sup>1,2</sup>, Omar Omar<sup>2</sup>, Chris Hyde<sup>3</sup>, Ly-Mee Yu<sup>2</sup>, Carolyn Doree<sup>1</sup>, Mike F. Murphy<sup>1</sup>  
24  
25  
26

- 27  
28 1. Systematic Review Initiative, NHS Blood and Transplant, Department of  
29 Haematology, Oxford University Hospitals and University of Oxford, UK.  
30  
31 2. Centre for Statistics in Medicine, University of Oxford, Oxford, UK  
32  
33 3. PenTAG, Peninsula College of Medicine and Dentistry, Exeter, UK  
34  
35  
36  
37  
38  
39

40 Correspondence to:

41  
42 Dr Sally Hopewell, Centre for Statistics in Medicine, University of Oxford, Wolfson College,  
43 Linton Road, Oxford, OX2 6UD, UK. Tel: +44 1865 284400; Fax: +44 1865 284424; Email:  
44 [sally.hopewell@csm.ox.ac.uk](mailto:sally.hopewell@csm.ox.ac.uk)  
45  
46  
47  
48

49  
50 **Keywords**

51  
52 Systematic review, observational studies, transfusion, mortality.  
53  
54

55 Word count 4324  
56  
57  
58  
59  
60

## ABSTRACT

**Objective:** To carry out a systematic review of recent large observational studies on the efficacy of red blood cell transfusion (RBCT), with particular emphasis on the statistical methods used to adjust for confounding. Given the limited number of randomized trials of the efficacy of RBCT, clinicians often use evidence from observational studies. However, confounding factors, for example individuals receiving blood generally being sicker than those who do not, makes their interpretation challenging.

**Design:** Systematic review.

**Information sources:** We searched MEDLINE and EMBASE for studies published from 1 January 2006 to 31 December 2010.

**Eligibility criteria for included studies:** We included prospective cohort, case control studies or retrospective analyses of databases or disease registers where the effect of risk factors for mortality or survival was examined. Studies must have included more than 1000 participants receiving RBCT for any cause. We assessed the effects of RBCT versus no RBCT and different volumes and age of RBCT.

**Results:** Thirty two studies were included in the review; 23 assessed the effects of RBCT versus no RBCT; five assessed different volumes and four older versus newer RBCT. There was considerable variability in the patient populations, study designs and level of statistical adjustment. Overall, most studies showed a higher rate of mortality when comparing patients who received RBCT with those who did not, even when these rates were adjusted for confounding; the majority of these increases were statistically significant. The same pattern was observed in studies where protection from bias was likely to be greater, such as prospective studies.

**Conclusion:** Observational studies do show a consistent adverse effect of RBCT on mortality. Whether this is a true effect remains uncertain and should be addressed by conducting well designed and powered randomized controlled trials.

## ARTICLE SUMMARY

**Article focus**

- Given the limited number of randomized trials of the efficacy of red blood cell transfusion (RBCT), clinicians often use evidence from observational studies.
- Confounding factors, for example individuals receiving blood generally being sicker than those who do not, can make their interpretation challenging.
- Our objective was to systematically review recent large observational studies (n>1000 patients) on the efficacy of RBCT, with particular emphasis on the statistical methods used to adjust for confounding.

**Key messages**

- We identified considerable variability in the patient populations, study designs and level of statistical adjustment.
- Most studies showed higher mortality rates when comparing patients who received RBCT with those who did not, even when adjusting for confounding. We identified similar patterns in studies where protection from bias was likely to be greatest.

**Strengths and limitations of this study**

- Overall, observational studies do show a consistent adverse effect of RBCT on mortality.
- However, even the best conducted adjustments for confounding cannot completely eliminate its impact, particularly when investigating the effect of RBCT on mortality.

## Introduction

Randomized controlled trials are considered the gold standard with which to evaluate the efficacy of a particular health care intervention. In 2005, Blajchman (1) published a study that explored the impact that ten landmark randomized controlled trials have had on the practice of transfusion medicine. The use of randomized trials to evaluate transfusion medicine has only been established since the 1980s (1). Given the limited number of high quality randomized trials of the efficacy of blood transfusion and the challenges of conducting new trials, clinicians often rely on evidence from observational studies. In a randomized trial patients are allocated to comparison groups at random, so the level of disease is likely to be similar in each group and differences in disease severity unlikely to be the explanation for any differences in outcome seen. In an observational study whether a treatment is received or not is likely to be heavily influenced by perceived need by the treating doctor and this will be particularly true where the outcomes of transfused patients are being compared with those not transfused. In this case the groups of patients being compared are not likely to be comparable and the differences in prognostic factors may of themselves lead to difference in outcome. The impact of such “confounding” can be reduced by adjustment in the statistical analysis, but the success of this is dependent on the technique used, complete identification of the factors which might influence outcome and their accurate measurement in the patients in the study (2). As all the factors influencing outcome may never be known, adjustment is unlikely to ever completely account for the confounding occurring in observational studies. The unknown inter-dependence of multiple factors is also a major challenge.

The impact that the contribution of data from observational studies has made to the practice of transfusion medicine has not been systematically explored. However, given their publication in major journals, their impact on clinicians may be greater than is appropriate

1  
2  
3 for the types of studies and the limitations associated with their design. The aims of this  
4  
5 systematic review were to identify recent, large observational studies on the effectiveness of  
6  
7 red blood cell transfusion (RBCT), to critique them with particular emphasis on the statistical  
8  
9 methods and the assumptions made in the analyses of the observational data, to consider  
10  
11 the validity of these data as an evidence base for the practice of transfusion medicine and to  
12  
13 inform future research in this field.  
14  
15

## 16 17 18 **Methods**

### 19 20 **Criteria for selecting studies**

#### 21 22 Type of participants

23  
24 We included both adults and children receiving RBCT for any cause. We also included studies  
25  
26 which stated that patients received red blood cells and other blood products. When  
27  
28 reported by the primary studies we assessed the effects of RBCT separately from other  
29  
30 blood products.  
31  
32

#### 33 34 35 Type of intervention and comparator

36  
37 We included the following risk factors:

- 38  
39 • RBCT versus no RBCT
- 40  
41 • Volume 'A' of RBCT versus volume 'B' of RBCT (as defined by the primary studies)
- 42  
43 • 'Older' RBCT versus 'newer' RBCT (as defined by the primary studies)
- 44  
45

#### 46 47 48 Type of outcome measure

49  
50 Our primary outcome measure was death, mortality or survival measured at any time point.  
51  
52

#### 53 54 55 Type of studies

1  
2  
3 We included prospective cohort, case control studies or retrospective analyses of databases  
4  
5 or disease registers where the effect of the above risk factors on death, mortality or survival  
6  
7 is examined. Studies must have included more than 1000 participants. This was a pragmatic  
8  
9 limit designed to focus attention on studies most likely to have had an impact and least likely  
10  
11 to have been affected by chance.  
12

### 13 14 15 16 **Search strategy**

17  
18 We carried out a comprehensive search of MEDLINE and EMBASE for studies published from  
19  
20 1 January 2006 to 31 December 2010 using the strategies in Appendix 1. We excluded  
21  
22 conference abstracts unless they had subsequently been published as full articles.  
23

### 24 25 26 27 **Data collection and analysis**

28  
29 One review author (CD) initially screened all search results for relevance against the  
30  
31 eligibility criteria and discarded all those that were clearly irrelevant. Thereafter, another  
32  
33 author (SH) independently screened all remaining hits. We retrieved full text articles for all  
34  
35 those references where we are unable to decide on eligibility based on the title and abstract  
36  
37 alone. All full text articles were independently screened by two review authors (SH, MM) to  
38  
39 ensure that they met the eligibility criteria.  
40  
41  
42  
43

### 44 45 46 47 **Data extraction and management**

48  
49 Two review authors (SH, OO) independently extracted data from all included studies. Any  
50  
51 disagreements were resolved by discussion or by consulting a third author if there was still  
52  
53 uncertainty. We extracted data on the following study characteristics: the study design, how  
54  
55 patients were recruited, the country where the study was conducted, the source of funding,  
56  
57 the type of participants, their age, disease area, setting, the type of intervention /  
58  
59 comparator and nature of the exposure, the number of participants in each group, whether  
60

1  
2  
3 any formal prescribing guidance was reported, the type of outcome measure (i.e. mortality)  
4  
5 and the time point at which it was measured.  
6  
7

8  
9 We also extracted information on the statistical methods used to adjust for differences  
10  
11 between study groups, in particular the number of study covariates measured, whether  
12  
13 important covariates relating to red cell transfusion were assessed (i.e. age, sex, co-  
14  
15 morbidity, hemoglobin) and whether these were incorporated into the analysis, whether the  
16  
17 choice of covariates were pre-specified or data driven and the statistical model used for the  
18  
19 statistical adjustment. We also assessed the effects of smoking as a study covariate in  
20  
21 relation to blood transfusion and its effect on mortality. In terms of the study results we  
22  
23 extracted data on the presentation of both the unadjusted and adjusted result for the effect  
24  
25 of red cell transfusion on mortality as reported by each study. If not reported by the primary  
26  
27 study we calculated (where there were sufficient data) the odds ratio for the effect of blood  
28  
29 transfusion on mortality for unadjusted analyses using STATA (version 11). We assessed, for  
30  
31 the unadjusted and adjusted result, whether the study reported summary statistics for each  
32  
33 comparison group, the treatment effect, confidence interval, p value and whether the result  
34  
35 was statistically significant. If a study reported more than one adjusted analysis we selected  
36  
37 in order of preference (i) the main adjusted analysis mentioned in the abstract, (ii) the main  
38  
39 adjusted analysis mentioned in the conclusions, (iii) the main adjusted analysis mentioned in  
40  
41 the results section. If mortality was assessed for more than one time point (i.e. at 30 days  
42  
43 and 1 year) then we used the shorter time point in our analysis.  
44  
45  
46  
47  
48  
49

#### 50 **Assessment of methodological quality**

51  
52 We also assessed whether studies met important methodological criteria for the reporting  
53  
54 of observational studies: whether the samples were representative of those to whom the  
55  
56 results might be generalised, whether important covariates in relation to RBCT and mortality  
57  
58  
59  
60



1  
2  
3 (e.g. sex, age, smoking, co-morbidity, hemoglobin level) were measured and incorporated  
4  
5 into the analysis, whether the method of dealing with confounding between patient groups  
6  
7 was adequate, whether a statistician was listed as an author of the study and whether the  
8  
9 data were collected prospectively following an agreed study design.  
10

### 11 12 13 14 **Method of analysis**

15 We have presented the results separately for the three different types of comparisons.  
16  
17 Within each, due to the varied nature of the clinical conditions, study designs and level of  
18  
19 statistical adjustment, we decided a priori not to combine the results of individual studies in  
20  
21 a meta-analysis and instead present the results of the individual studies descriptively in the  
22  
23 text, tables and figures.  
24  
25  
26  
27

### 28 29 **Results**

30  
31 Searches of MEDLINE and EMBASE identified 4318 possible records. 4272 did not meet the  
32  
33 eligibility criteria for this study. Full articles were retrieved for 46 studies; 14 further studies  
34  
35 were excluded as they did not fulfil our eligibility criteria (see Figure 1). Thirty two studies  
36  
37 were included in the review; 23 (3-26) studies assessed the effects of RBCT versus no RBCT,  
38  
39 five studies (27-31) assessed different volumes of RBCT and four (32-35) assessed giving  
40  
41 older versus newer RBCT.  
42  
43  
44  
45

### 46 47 **Red blood cell transfusion versus no red blood cell transfusion**

48  
49 Twenty three studies (3-26) assessed the effects of RBCT versus no RBCT on mortality. Four  
50  
51 of these studies (4;8;10;17) included both red cell transfusion and other blood products (e.g.  
52  
53 platelets, plasma, cryoprecipitate); for one study, data were available separately for RBCT  
54  
55 and mortality (10). For three studies it was unclear if other blood products were transfused  
56  
57 along with red blood cells (7;9;18).  
58  
59  
60

1  
2  
3  
4  
5 *Study characteristics (Table 1)*  
6

7 Eight studies were prospective cohort studies following up a planned group of patients  
8 (3;4;11;12;14;20-23), the other 15 studies assessed data from a retrospective patient  
9 registry or database. Fourteen studies were conducted in the USA, two in the UK, two in  
10 Israel and the remainder in Belgium, the Netherlands, Iran and Denmark; one study was  
11 conducted in multiple countries. The time period assessed was between 1989 and 2008.  
12 Twelve of the studies (3;5;7;8;11-14;16-18;20;22) specifically looked at adults undergoing  
13 cardiac surgery, five were in patients in the intensive care unit (6;21;23;25;26), two were in  
14 adults trauma patients (4;24), two were in patients following hip fracture/replacement  
15 (9;15) one was in oncology patients (10) and the other in pediatric trauma patients (19).  
16 Three of the studies (8;16;17) specifically looked at the effects of RBCT in older adults (e.g. >  
17 60 years). The size of the studies varied from 1,624 participants to 504,208 participants with  
18 an overall median sample size of 4344 (IQR 2085 to 11963); median 1068 (IQR 430 to 5812)  
19 for patients undergoing RBCT compared to median 2325 (IQR 1636 to 6151) for patient with  
20 no RBCT. The time period at which mortality was assessed also varied across studies from in-  
21 hospital to mortality at seven years; the most common time point being mortality at or  
22 within 30 days. Several studies reported mortality for more than one time period. Only  
23 seven of the 23 studies provided any mention of guidelines for the prescription of RBCT; two  
24 studies said no formal protocol was used (4;19), two studies stated a hemoglobin of <8g/dl  
25 (6;9), one study stated a hematocrit of less than 25-26% (18) and two studies said  
26 prescription was at the discretion of the patient care team (20;21). For full details of the  
27 characteristics of the included studies see Appendix 2.  
28  
29  
30  
31  
32  
33  
34  
35  
36  
37  
38  
39  
40  
41  
42  
43  
44  
45  
46  
47  
48  
49  
50  
51

52  
53  
54  
55 *Statistical methods (Table 2)*  
56  
57  
58  
59  
60

1  
2  
3 All 23 studies provided information on the statistical methods used to adjust for differences  
4 in the baseline characteristics of patients who received RBCT and those who did not.  
5 However, the amount of detail and appropriateness of the method used varied across  
6 studies. In 13 studies (3;5;6;10-15;18;20;21;23;26) the choices of covariates measured were  
7 reported as pre-specified and not data driven, but this was unclear for the remaining 10  
8 studies. The number of covariates measured and incorporated in the analysis also varied  
9 across studies with half the studies reported to assess more than 20 different covariates.  
10 Despite the high number of covariates assessed in these studies, not all measured covariates  
11 which appeared to be of specific importance in relation to RBCT. All of the 23 studies did  
12 report measuring the age and sex of the patients and 21 reported measuring patient co-  
13 morbidity. Overall, only eight (3;7;8;11-14;18;25) studies measured and incorporated the  
14 covariates age, sex, smoking, co-morbidity and haemoglobin level into the adjusted analysis..  
15 Fourteen of the 23 studies reported using logistic regression (i.e. mortality was reported as a  
16 binary outcome) as the method of adjusting for differences in the baseline characteristics  
17 between the two patients groups; six studies reported using Cox proportional hazard (i.e.  
18 mortality was reported as a time to event outcome) and three studies reporting using both  
19 methods; in these three studies mortality was assessed for more than one time period. For  
20 full details of the statistical methods see Appendix 3.  
21  
22  
23  
24  
25  
26  
27  
28  
29  
30  
31  
32  
33  
34  
35  
36  
37  
38  
39  
40  
41  
42  
43

#### 44 *Presentation of adjusted and unadjusted results (Table 3)*

45  
46 There were marked differences in the presentation and reporting of the unadjusted and  
47 adjusted results when comparing the effects of RBCT versus no RBCT on mortality. Seven of  
48 the 23 studies reported a summary statistic for each group for both the unadjusted and  
49 adjusted analysis. Five studies reported a summary statistics for only the unadjusted analysis  
50 and one study for the adjusted analysis only; no summary statistic comparing the effects of  
51 RBCT versus no RBCT on mortality was reported in the remained 10 studies. Eight studies  
52  
53  
54  
55  
56  
57  
58  
59  
60

1  
2  
3 reported the treatment effect (e.g. odds ratio, risk ratio, hazard ratio) and the corresponding  
4  
5 confident interval (six studies) for both the unadjusted and adjusted analysis (3;11;12;14-  
6  
7 16;20;22;26), whereas 12 studies reported the treatment effect and confident interval (10  
8  
9 studies) for adjusted analysis only and one study for the unadjusted analysis only. Where  
10  
11 possible we calculated the odds ratio for the effect of RBCT on mortality for unadjusted  
12  
13 analyses if it was not reported in the published article.  
14  
15

16  
17  
18 Seventeen of the 23 studies reported a statistically significant result for the unadjusted  
19  
20 analysis, and 15 for the adjusted analysis (Figure 2), when comparing the effect of RBCT  
21  
22 versus no RBCT on mortality, with more deaths occurring in patients receiving transfusion.  
23  
24 This effect was statistically non-significant in seven studies based on the result of the  
25  
26 adjusted analysis. Prospective studies were more likely to show a statistically significant  
27  
28 effect for blood transfusion on mortality compared to retrospective studies for both the  
29  
30 unadjusted and adjusted analysis. For full details see Appendix 4.  
31  
32

### 33 34 35 **Volume 'A' red blood versus volume 'B' red blood cells**

36  
37 Five studies (27-31) assessed the effect of different volumes of RBCT on mortality. One of  
38  
39 these studies (31) included both RBCT and other blood products.  
40  
41

#### 42 43 44 *Study characteristics (Table 1)*

45  
46 One study assessed a prospective cohort and followed up a planned group of patients (31),  
47  
48 the other four studies assessed data from a retrospective patient registry or database. Two  
49  
50 of the studies (29;31) specifically looked at adults undergoing cardiac surgery, one was in  
51  
52 trauma patients (28), one was in patients undergoing major surgery (27) and one in patients  
53  
54 in the intensive care unit (30). The size of the studies varied from 1,841 participants to  
55  
56 125,177 participants, with an overall median sample size of 8215 (IQR 3037 to 8799). The  
57  
58  
59  
60

1  
2  
3 volume of RBCT varied considerably across studies from 1-2 units to more than eight units.  
4  
5 The time period at which mortality was assessed also varied across studies from in-hospital  
6  
7 to mortality at eight years. Three of the five studies provided any mention of guidelines for  
8  
9 the prescription of red blood cells, however only one gave any specific requirement stating a  
10  
11 hemoglobin of <8g/dl (30) (See Appendix 2).  
12

### 13 14 15 16 *Statistical methods (Table 2)*

17  
18 All five studies provided information on the statistical methods used to adjust for differences  
19  
20 in the baseline characteristics of patients who received different volumes of red blood  
21  
22 transfusion, however, as with the studies of RBCT versus no RBCT, the amount of detail and  
23  
24 appropriateness of the method used varied across studies. In all five studies (27-31) the  
25  
26 choices of covariates measured were reported as pre-specified. The number of covariates  
27  
28 measured and incorporated in the analysis varied across studies with two the studies  
29  
30 reported to assess more than 20 different covariates. Once again, despite the high number  
31  
32 of covariates assessed in these studies, not all measured covariates seem to be of specific  
33  
34 importance in relation to RBCT. All five studies reported measuring age and sex and patient  
35  
36 co-morbidity, however, one (27) measured and incorporated the covariates age, sex,  
37  
38 smoking, co-morbidity and hemoglobin level into the adjusted analysis.  
39  
40  
41  
42  
43

### 44 *Presentation of adjusted and unadjusted results (Table 3)*

45  
46 As with the studies of RBCT versus no RBCT, there were marked difference in the  
47  
48 presentation and reporting of the unadjusted and adjusted results when comparing the  
49  
50 effects of different volumes of RBCT on mortality. Two studies reported a statistically  
51  
52 significant result for the adjusted analysis with more deaths occurring in patients receiving  
53  
54 larger volumes of RBCT. This effect was statistically non significant in two studies based on  
55  
56 the result for adjusted analysis and was not reported for the remaining one study. No  
57  
58  
59  
60

1  
2  
3 studies reported on the statistical significance of the result of the unadjusted analysis (See  
4  
5 Appendix 3 and 4).  
6  
7  
8

### 9 **'Older' red blood cells versus 'newer' red blood cells**

10  
11 Four (32-35) studies assessed the effects of age of RBCT on mortality, one of which  
12 specifically looked at leukodepleted RBCT (35).  
13  
14

#### 15 *Study characteristics (Table 1)*

16  
17 All four studies assessed data from a retrospective patient registry or database. Two of the  
18 studies (33;34) specifically looked at adults undergoing cardiac surgery, one was in trauma  
19 patients (35), while the other did not mention a specific patient group. The size of the  
20 studies varied from 1,813 participants to 364,037 participants, with an overall median  
21 sample size of 4358 (IQR 2264 to 185019). The period of time in which the blood was stored  
22 varied considerably across studies. Two studies (33;35) assessed RBCT stored for less than 14  
23 days compared to those stored for more than 14 days, one study (34) compared blood  
24 stored for less than 18 days and with blood stored for more than 18 days and one study (32)  
25 looked at multiple storage periods ranging from 1 to 42 days. None of the studies provided  
26 any mention of guidelines for the prescription of red blood cells (See Appendix 2).  
27  
28  
29  
30  
31  
32  
33  
34  
35  
36  
37  
38  
39  
40  
41  
42  
43

#### 44 *Statistical methods (Table 2)*

45  
46 All four studies provided information on the statistical methods used to adjust for  
47 differences in the baseline characteristics of patients who received RBCT stored for different  
48 time periods, however, once again the amount of detail and appropriateness of the method  
49 used varied across studies. The number of covariates measured and incorporated in the  
50 analysis also varied across studies. All of the four studies reported measuring the age and  
51 sex of the participants. Only one study reported measuring smoking status, two studies  
52  
53  
54  
55  
56  
57  
58  
59  
60

1  
2  
3 reported measuring patient hemoglobin levels and three studies reported assessing patient  
4  
5 co-morbidities. Only one (33) of the four studies measured and incorporated the covariates  
6  
7 age, sex, smoking, co-morbidity and haemoglobin level into the adjusted analysis.  
8  
9

#### 10 11 *Presentation of adjusted and unadjusted results (Table 3)*

12  
13 As with the studies of RBCT versus no RBCT and of volume 'A' red blood cells versus volume  
14  
15 'B' RBCT, there were marked differences in the presentation and reporting of the unadjusted  
16  
17 and adjusted results when comparing the effects of RBCT stored for different time periods  
18  
19 on mortality. Two studies reported a statistically significant result for the unadjusted  
20  
21 analysis and one study reported a statistically significant result for the adjusted analysis. In  
22  
23 two of these three studies there were more deaths occurring in patients receiving older  
24  
25 blood and in one study there were more deaths in patients receiving newer blood. This  
26  
27 effect was statistically non significant in three studies based on the result for adjusted  
28  
29 analysis (See Appendix 3 and 4).  
30  
31  
32  
33  
34

#### 35 **Assessment of methodological quality (Table 4)**

36  
37 Overall the assessment of methodological quality varied across studies and by study group  
38  
39 with only 10 of the 32 included studies assessing a prospective cohort following up a  
40  
41 planned group of patients over time, the remaining two-third of the studies assessed data  
42  
43 from a retrospective patient registry or database. In most studies the sample of patients  
44  
45 included in the study was considered representative of those to whom the results might be  
46  
47 generalised. Four studies (8;16;17;25) specifically focussed on older adults (>60 years) and  
48  
49 one study (19) on children, so the findings from these studies should only be interpreted in  
50  
51 relation to these specific patient groups. The baseline characteristics of patients who  
52  
53 received RBCT compared to those patients who did not receive RBCT (or patients who  
54  
55 received different volumes or age of blood) were often very different and so we wanted to  
56  
57  
58  
59  
60

1  
2  
3 assess whether studies had adjusted for these differences when carrying out their statistical  
4  
5 analysis. Only 10 studies measured and incorporated in the analysis covariates which we  
6  
7 deemed of specific importance in relation to RBCT (i.e. age, sex, smoking, co-morbidity and  
8  
9 haemoglobin level), thus we deemed the method of dealing with confounding between  
10  
11 patient groups as adequate in only 31% of studies. Critically however, when we restricted  
12  
13 our analysis of results to studies with adequate methods, the pattern of an increase in  
14  
15 mortality associated with RBCT remained unchanged.  
16  
17  
18  
19

## 20 Discussion

### 21 *Summary of main findings*

22  
23 We identified 32 observational studies of more than 1000 participants published between  
24  
25 2006 and 2010 assessing the effect of RBCT on mortality. Twenty three studies compared  
26  
27 RBCT versus no RBCT, five compared different volumes and four compared different storage  
28  
29 times. Overall there was considerable variability in the characteristics of the observational  
30  
31 studies. However, the majority, of studies were retrospective designs assessing patients  
32  
33 from an existing patient register or database.  
34  
35  
36  
37  
38  
39

40 We also identified considerable variability in the statistical methods used to adjust for  
41  
42 differences in the baseline characteristics of patients who received RBCT and those who did  
43  
44 not. It was often unclear if the choice of covariates measured and used in the adjusted  
45  
46 analyses were pre-specified at the start of the study or were driven by the underlying data.  
47  
48 Perhaps most importantly, around half of the 32 studies did not measure and adjust for  
49  
50 covariates which we deemed of specific importance to blood transfusion - for example,  
51  
52 patient hemoglobin levels, age, sex and existing co-morbidities. Less than a third of studies  
53  
54 assessed smoking which, while not directly correlated with transfusion, is an important  
55  
56 covariate when assessing mortality.  
57  
58  
59  
60



1  
2  
3  
4  
5 Overall, more studies found a higher rate of mortality in patients receiving RBCT compared  
6  
7 with those who did not, and this effect was seen in both the adjusted and unadjusted  
8  
9 results. In general, where measured equivalently within the same study, the unadjusted  
10  
11 estimate of risk was greater than the adjusted risk, emphasising that adverse prognostic  
12  
13 factors are more common in patients receiving RBCT and that adjusting for them leads to a  
14  
15 smaller estimate of risk. Considering the adjusted risks, although the size of the effect was  
16  
17 not consistent across all studies, the direction of the effect was. Most studies suggest an  
18  
19 increased risk of mortality associated with RBCT. Further, those studies which were designed  
20  
21 prospectively and which used better methods of adjusting for differences in the baseline  
22  
23 characteristics between groups were more likely to show an increase in the risk of mortality  
24  
25 compared to studies which were based on retrospective registries or databases, although,  
26  
27 again the size of the effect was not consistent across all studies. However, it is important to  
28  
29 remember that even with the best methods of adjustment it cannot completely eliminate  
30  
31 the impact of confounding (2), as the sicker the patients (thus an increased risk of mortality)  
32  
33 the more likely they are to have received RBCT.  
34  
35  
36  
37  
38  
39

#### 40 *Comparison with other studies*

41  
42 We are aware of one other systematic review of observational studies looking at the effects  
43  
44 of RBCT on mortality, which focussed specifically on critically ill adults in intensive care units  
45  
46 and adult trauma and surgical patients (36). This systematic review by Marik and colleagues  
47  
48 included more studies (n=45) than our review as it did not restrict its inclusion criteria to  
49  
50 studies with >1000 patients; the median number of patients analysed was 687. They also  
51  
52 found that RBCT was associated with an increased risk of mortality based on a meta-analysis  
53  
54 of 12 studies (odds ratio 1.7; 95% CI 1.4 to 1.9). However there was considerable  
55  
56 heterogeneity in the meta-analysis, suggesting that it might not have been appropriate to  
57  
58  
59  
60

1  
2  
3 combine the results of the individual studies and supports our decision not to conduct a  
4  
5 meta-analysis.  
6  
7

8  
9  
10 In an overview of evidence from randomized controlled trials Wilkinson and colleagues (37)  
11 identified 142 trials in RBCT. The majority compared the effects of leucoreduced RBCT or  
12 different transfusion triggers (n=71). However, they did identify 12 trials comparing the  
13 effects of RBCT versus no transfusion, seven looking at different volumes of RBCT and 11  
14 different ages of red blood cells. The size of the trials was very small (median 30 to 40  
15 patients) and the overview did not specifically examine the effect of RBCT on mortality.  
16  
17  
18  
19  
20  
21  
22  
23  
24  
25  
26  
27  
28  
29  
30  
31  
32  
33  
34  
35  
36  
37  
38  
39  
40  
41  
42  
43  
44  
45  
46  
47  
48  
49  
50  
51  
52  
53  
54  
55  
56  
57  
58  
59  
60

Currently, we are aware of at least 14 ongoing or recently completed randomized controlled trials examining the effects of the age of RBCT on clinical outcomes including the ARIPI (Age of Red blood cells In Premature Infants) (38) ABLE, (Age of BLOOD Evaluation trial in the resuscitation of critically ill patients) (39), RECESS (REd CELL Storage duration Study) (40) and INFORM (Effects of transfusing fresh versus standard-issue red cells on in-hospital mortality) trials, for which mortality or survival is a specified outcome measure.

#### *Limitations*

Our study has several limitations. Firstly, we only included studies published in the last five years and which included more than 1,000 patients. This was because we hypothesised that studies with a larger sample size are more likely to show a truer effect of the intervention (41) and that more recent studies are more likely to use better statistical methods. It is possible therefore that the overall effect seen here might be different in older studies and/or in those carried out in smaller numbers of patients. Secondly, we decided not to combine the results of individual studies because of the variability in clinical settings and study methods, and instead presented the results of individual studies descriptively in the text and in tables and figures. More formal statistical analysis might have given a more

1  
2  
3 precise indication of the overall effect of red cell transfusion on mortality, but would have  
4  
5 ignored the significant amount of clinical and methodological heterogeneity between  
6  
7 studies which we identified a priori and which was very apparent in the analysis done by  
8  
9 Marik and colleagues (36). However, in the absence of a more formal statistical analysis we  
10  
11 have inevitably had to rely on a vote-counting approach which also has great dangers,  
12  
13 particularly the assumption that each included study has equal weight. Our main protection  
14  
15 against this is the very pronounced nature of the pattern we have observed and the fact that  
16  
17 we have limited our conclusions to the direction of effect.  
18  
19

20  
21  
22 Finally, we limited our inclusion criteria to published articles and excluded unpublished  
23  
24 studies or those published only as conference abstracts; thus our study could be subject to  
25  
26 publication bias , as studies which did not show a significant effect of red cell transfusion on  
27  
28 mortality might be less likely to be published in full (42). Outcome reporting bias may also be  
29  
30 a problem, although difficult to combat, in the case where a risk has been measured at  
31  
32 different time points but only those time points which are “positive” are reported. However,  
33  
34 in the case of both publication and outcome reporting bias, the extreme nature of the  
35  
36 pattern makes it relatively implausible that there are sufficient unpublished studies or time  
37  
38 points to reverse it.  
39  
40  
41  
42

#### 43 44 *Conclusion*

45  
46 The findings from this systematic review of recent large scale observational studies show  
47  
48 considerable variability in the patient populations and study methods when comparing the  
49  
50 effects of RBCT on mortality. Overall, observational studies do show a consistent adverse  
51  
52 effect of RBCT on mortality. Although it seems unlikely that this can be entirely explained by  
53  
54 selective sampling or a predominance of poorer quality observational studies, it remains  
55  
56 possible that even the best conducted adjustments cannot completely eliminate the impact  
57  
58  
59  
60

1  
2  
3 of confounding, particularly when investigating the effect of RBCT. We therefore believe that  
4  
5 this can only be resolved through well designed and adequately powered randomized  
6  
7 controlled trials. Before these can be conducted, the importance of the research question  
8  
9 and the uncertainty of the current evidence need to be accepted. This requires clearer and  
10  
11 more widespread presentation and understanding of the existing research evidence, to  
12  
13 which we believe this study is a significant contribution.  
14  
15

16  
17  
18 **Author contributions:** SH and OO were involved in the design, implementation, and analysis  
19  
20 of the study and in writing the final manuscript. CH, MM and LY were involved in the design  
21  
22 and analysis of the study and in writing the final manuscript.  
23

24  
25 **Financial disclosures:** None reported.  
26

27  
28 **Funding/support:** This study was funded by NHS Blood and Transplant, Research and  
29  
30 Development, UK.

31  
32 **Additional contributions:** We are grateful to Susan Brunskill for her helpful comments on  
33  
34 this manuscript.

35  
36 **Data Sharing:** We are willing to share data from our study.  
37

### 38 39 40 41 42 43 44 45 46 47 48 49 50 51 52 53 54 55 56 57 58 59 60

#### References

- (1) Blajchman MA. Landmark studies that have changed the practice of transfusion medicine. *Transfusion* 2005 September;45(9):1523-30.
- (2) Deeks JJ, Dinnes J, D'Amico R, Sowden AJ, Sakarovitch C, Song F, Petticrew M, Altman DG. Evaluating non-randomised intervention studies. *Health Technol Assess* 2003;7(27):iii-173.
- (3) Aronson D, Dann EJ, Bonstein L, Blich M, Kapeliovich M, Beyar R, Markiewicz W, Hammerman H. Impact of red blood cell transfusion on clinical outcomes in patients with acute myocardial infarction. *Am J Cardiol* 2008 July 15;102(2):115-9.
- (4) Bochicchio GV, Napolitano L, Joshi M, Bochicchio K, Meyer W, Scalea TM. Outcome analysis of blood product transfusion in trauma patients: a prospective, risk-adjusted study. *World J Surg* 2008 October;32(10):2185-9.
- (5) Engoren M, Habib RH, Hadaway J, Zacharias A, Schwann TA, Riordan CJ, Durham SJ, Shah A. The effect on long-term survival of erythrocyte transfusion given for cardiac valve operations. *Ann Thorac Surg* 2009 July;88(1):95-100, 100.

- 1  
2  
3 (6) Engoren M, Arslanian-Engoren C. Long-term survival in the intensive care unit after  
4 erythrocyte blood transfusion. *Am J Crit Care* 2009 March;18(2):124-31.
- 5  
6 (7) Garty M, Cohen E, Zuchenko A, Behar S, Boyko V, Iakobishvili Z, Mittelman M, Battler  
7 A, Shotan A, Gottlieb S, Caspi A, Hasdai D. Blood transfusion for acute  
8 decompensated heart failure--friend or foe? *Am Heart J* 2009 October;158(4):653-8.
- 9  
10 (8) Jani SM, Smith DE, Share D, Kline-Rogers E, Khanal S, O'Donnell MJ, Gardin J,  
11 Moscucci M. Blood transfusion and in-hospital outcomes in anemic patients with  
12 myocardial infarction undergoing percutaneous coronary intervention. *Clin Cardiol*  
13 2007 October;30(10 Suppl 2):II49-II56.
- 14  
15 (9) Johnston P, Wynn-Jones H, Chakravarty D, Boyle A, Parker MJ. Is perioperative blood  
16 transfusion a risk factor for mortality or infection after hip fracture? *J Orthop*  
17 *Trauma* 2006 November;20(10):675-9.
- 18  
19 (10) Khorana AA, Francis CW, Blumberg N, Culakova E, Refaai MA, Lyman GH. Blood  
20 transfusions, thrombosis, and mortality in hospitalized patients with cancer. *Arch*  
21 *Intern Med* 2008 November 24;168(21):2377-81.
- 22  
23 (11) Koch CG, Li L, Duncan AI, Mihaljevic T, Cosgrove DM, Loop FD, Starr NJ, Blackstone  
24 EH. Morbidity and mortality risk associated with red blood cell and blood-  
25 component transfusion in isolated coronary artery bypass grafting. *Crit Care Med*  
26 2006 June;34(6):1608-16.
- 27  
28 (12) Koch CG, Li L, Duncan AI, Mihaljevic T, Loop FD, Starr NJ, Blackstone EH. Transfusion  
29 in coronary artery bypass grafting is associated with reduced long-term survival. *Ann*  
30 *Thorac Surg* 2006 May;81(5):1650-7.
- 31  
32 (13) Murphy GJ, Reeves BC, Rogers CA, Rizvi SI, Culliford L, Angelini GD. Increased  
33 mortality, postoperative morbidity, and cost after red blood cell transfusion in  
34 patients having cardiac surgery. *Circulation* 2007 November 27;116(22):2544-52.
- 35  
36 (14) Nikolsky E, Mehran R, Sadeghi HM, Grines CL, Cox DA, Garcia E, Tchong JE, Griffin JJ,  
37 Guagliumi G, Stuckey T, Turco M, Fahy M, Lansky AJ, Stone GW. Prognostic impact of  
38 blood transfusion after primary angioplasty for acute myocardial infarction: analysis  
39 from the CADILLAC (Controlled Abciximab and Device Investigation to Lower Late  
40 Angioplasty Complications) Trial. *JACC Cardiovasc Interv* 2009 July;2(7):624-32.
- 41  
42 (15) Pedersen AB, Mehnert F, Overgaard S, Johnsen SP. Allogeneic blood transfusion and  
43 prognosis following total hip replacement: a population-based follow up study. *BMC*  
44 *Musculoskelet Disord* 2009;10:167.
- 45  
46 (16) Rogers MA, Blumberg N, Saint SK, Kim C, Nallamotheu BK, Langa KM. Allogeneic blood  
47 transfusions explain increased mortality in women after coronary artery bypass graft  
48 surgery. *Am Heart J* 2006 December;152(6):1028-34.
- 49  
50 (17) Rogers MA, Blumberg N, Saint S, Langa KM, Nallamotheu BK. Hospital variation in  
51 transfusion and infection after cardiac surgery: a cohort study. *BMC Med* 2009;7:37.
- 52  
53 (18) Salehiomran A, Ahmadi H, Karimi A, Tazik M, Dowlatshahi S, Fathollahi M.S., Abbasi  
54 S.H. Transfusion associated in-hospital mortality and morbidity in isolated coronary  
55 artery bypass graft surgery. *Central European Journal of Medicine* 2009;4(3):286-92.
- 56  
57  
58  
59  
60

- 1  
2  
3 (19) Stone TJ, Riesenman PJ, Charles AG. Red blood cell transfusion within the first 24  
4 hours of admission is associated with increased mortality in the pediatric trauma  
5 population: a retrospective cohort study. *J Trauma Manag Outcomes* 2008;2(1):9.  
6  
7 (20) Surgenor SD, Kramer RS, Olmstead EM, Ross CS, Sellke FW, Likosky DS, Marrin CA,  
8 Helm RE, Jr., Leavitt BJ, Morton JR, Charlesworth DC, Clough RA, Hernandez F,  
9 Frumiento C, Benak A, DioData C, O'Connor GT. The association of perioperative red  
10 blood cell transfusions and decreased long-term survival after cardiac surgery.  
11 *Anesth Analg* 2009 June;108(6):1741-6.  
12  
13 (21) Taylor RW, O'Brien J, Trottier SJ, Manganaro L, Cytron M, Lesko MF, Arnzen K,  
14 Cappadoro C, Fu M, Plisco MS, Sadaka FG, Veremakis C. Red blood cell transfusions  
15 and nosocomial infections in critically ill patients. *Crit Care Med* 2006  
16 September;34(9):2302-8.  
17  
18 (22) van Straten AH, Bekker MW, Soliman Hamad MA, van Zundert AA, Martens EJ,  
19 Schonberger JP, de Wolf AM. Transfusion of red blood cells: the impact on short-  
20 term and long-term survival after coronary artery bypass grafting, a ten-year follow-  
21 up. *Interact Cardiovasc Thorac Surg* 2010 January;10(1):37-42.  
22  
23 (23) Vincent JL, Sakr Y, Sprung C, Harboe S, Damas P. Are blood transfusions associated  
24 with greater mortality rates? Results of the Sepsis Occurrence in Acutely Ill Patients  
25 study. *Anesthesiology* 2008 January;108(1):31-9.  
26  
27 (24) Weinberg JA, McGwin G, Jr., Marques MB, Cherry SA, III, Reiff DA, Kerby JD, Rue LW,  
28 III. Transfusions in the less severely injured: does age of transfused blood affect  
29 outcomes? *J Trauma* 2008 October;65(4):794-8.  
30  
31 (25) Wu WC, Smith TS, Henderson WG, Eaton CB, Poses RM, Uttley G, Mor V, Sharma SC,  
32 Vezeridis M, Khuri SF, Friedmann PD. Operative blood loss, blood transfusion, and  
33 30-day mortality in older patients after major noncardiac surgery. *Ann Surg* 2010  
34 July;252(1):11-7.  
35  
36 (26) Zilberberg MD, Stern LS, Wiederkehr DP, Doyle JJ, Shorr AF. Anemia, transfusions  
37 and hospital outcomes among critically ill patients on prolonged acute mechanical  
38 ventilation: a retrospective cohort study. *Crit Care* 2008;12(2):R60.  
39  
40 (27) Bernard AC, Davenport DL, Chang PK, Vaughan TB, Zwischenberger JB.  
41 Intraoperative transfusion of 1 U to 2 U packed red blood cells is associated with  
42 increased 30-day mortality, surgical-site infection, pneumonia, and sepsis in general  
43 surgery patients. *J Am Coll Surg* 2009 May;208(5):931-7, 937.  
44  
45 (28) Charles A, Shaikh AA, Walters M, Huehl S, Pomerantz R. Blood transfusion is an  
46 independent predictor of mortality after blunt trauma. *Am Surg* 2007  
47 January;73(1):1-5.  
48  
49 (29) O'Keeffe SD, Davenport DL, Minion DJ, Sorial EE, Endean ED, Xenos ES. Blood  
50 transfusion is associated with increased morbidity and mortality after lower  
51 extremity revascularization. *J Vasc Surg* 2010 March;51(3):616-21, 621.  
52  
53 (30) Ruttinger D, Wolf H, Kuchenhoff H, Jauch KW, Hartl WH. Red cell transfusion: an  
54 essential factor for patient prognosis in surgical critical illness? *Shock* 2007  
55 August;28(2):165-71.  
56  
57  
58  
59  
60

- 1  
2  
3 (31) Weightman WM, Gibbs NM, Sheminant MR, Newman MA, Grey DE. Moderate  
4 exposure to allogeneic blood products is not associated with reduced long-term  
5 survival after surgery for coronary artery disease. *Anesthesiology* 2009  
6 August;111(2):327-33.  
7
- 8 (32) Edgren G, Kamper-Jorgensen M, Eloranta S, Rostgaard K, Custer B, Ullum H, Murphy  
9 EL, Busch MP, Reilly M, Melbye M, Hjalgrim H, Nyren O. Duration of red blood cell  
10 storage and survival of transfused patients (CME). *Transfusion* 2010  
11 June;50(6):1185-95.  
12
- 13 (33) Koch CG, Li L, Sessler DI, Figueroa P, Hoeltge GA, Mihaljevic T, Blackstone EH.  
14 Duration of red-cell storage and complications after cardiac surgery. *N Engl J Med*  
15 2008 March 20;358(12):1229-39.  
16
- 17 (34) van de Watering L, Lorinser J, Versteegh M, Westendorp R, Brand A. Effects of  
18 storage time of red blood cell transfusions on the prognosis of coronary artery  
19 bypass graft patients. *Transfusion* 2006 October;46(10):1712-8.  
20
- 21 (35) Weinberg JA, McGwin G, Jr., Griffin RL, Huynh VQ, Cherry SA, III, Marques MB, Reiff  
22 DA, Kerby JD, Rue LW, III. Age of transfused blood: an independent predictor of  
23 mortality despite universal leukoreduction. *J Trauma* 2008 August;65(2):279-82.  
24
- 25 (36) Marik PE, Corwin HL. Efficacy of red blood cell transfusion in the critically ill: a  
26 systematic review of the literature. *Crit Care Med* 2008 September;36(9):2667-74.  
27
- 28 (37) Wilkinson KL, Brunskill SJ, Doree C, Hopewell S, Stanworth S, Murphy MF, Hyde C.  
29 The clinical effects of red blood cell transfusions: an overview of the randomized  
30 controlled trials evidence base. *Transfus Med Rev* 2011 April;25(2):145-55.  
31
- 32 (38) Fergusson D, Hutton B, Hogan DL, LeBel L, Blajchman MA, Ford JC, Hebert P,  
33 Kakadekar A, Kovacs L, Lee S, Sankaran K, Shapiro S, Smyth JA, Ramesh K, Bouali NR,  
34 Tinmouth A, Walker R. The age of red blood cells in premature infants (ARIPi)  
35 randomized controlled trial: study design. *Transfus Med Rev* 2009 January;23(1):55-  
36 61.  
37
- 38 (39) Lacroix J, Hebert P, Fergusson D, Tinmouth A, Blajchman MA, Callum J, Cook D,  
39 Marshall JC, McIntyre L, Turgeon AF. The Age of Blood Evaluation (ABLE) randomized  
40 controlled trial: study design. *Transfus Med Rev* 2011 July;25(3):197-205.  
41
- 42 (40) Steiner ME, Assmann SF, Levy JH, Marshall J, Pulkrabek S, Sloan SR, Triulzi D, Stowell  
43 CP. Addressing the question of the effect of RBC storage on clinical outcomes: the  
44 Red Cell Storage Duration Study (RECESS) (Section 7). *Transfus Apher Sci* 2010  
45 August;43(1):107-16.  
46
- 47 (41) Dechartres A, Boutron I, Trinquart L, Charles P, Ravaud P. Single-center trials show  
48 larger treatment effects than multicenter trials: evidence from a meta-epidemiologic  
49 study. *Ann Intern Med* 2011 July 5;155(1):39-51.  
50
- 51 (42) Scherer RW, Langenberg P, von EE. Full publication of results initially presented in  
52 abstracts. *Cochrane Database Syst Rev* 2007;(2):MR000005.  
53  
54  
55  
56  
57  
58  
59  
60

Figure 1: Flow diagram of study inclusion (1 January 2006 to 31 December 2010)

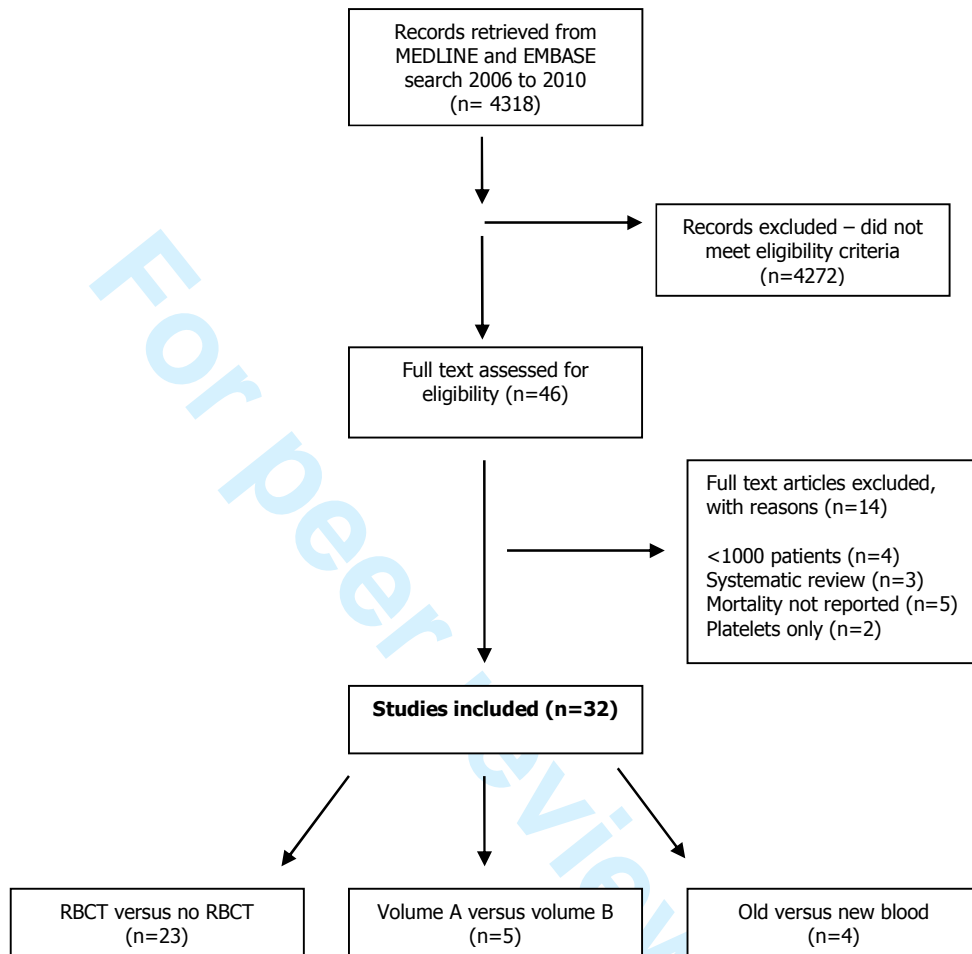



Figure 2: Effect of red blood cell transfusion versus no red blood cell transfusion on mortality (adjusted results)

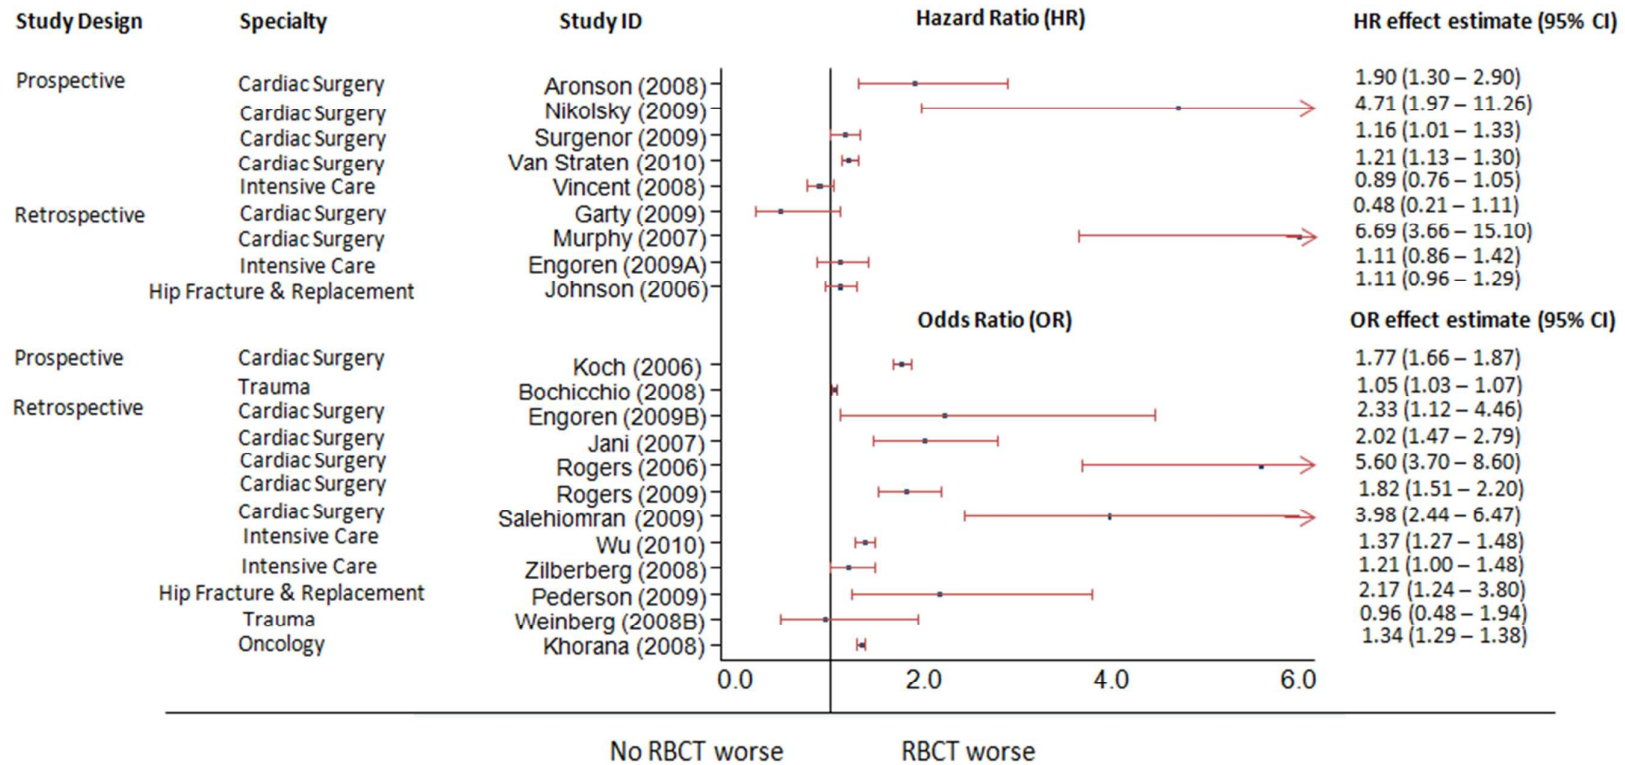

**Table 1: Summary of characteristics of included studies**

| Type of comparison               | RBC vs. no RBC<br>(n=23) | Volume 'A' vs. Volume<br>'B'(n=5) | Old RBC vs. new RBC<br>(n=4) |
|----------------------------------|--------------------------|-----------------------------------|------------------------------|
| <b>Design</b>                    |                          |                                   |                              |
| Prospective                      | 8 (35%)                  | 1 (20%)                           |                              |
| Retrospective                    | 15 (65%)                 | 4 (80%)                           | 4 (100%)                     |
| <b>Country</b>                   |                          |                                   |                              |
| Australia                        |                          | 1 (20%)                           |                              |
| Belgium                          | 1 (4%)                   |                                   |                              |
| Denmark                          | 1 (4%)                   |                                   |                              |
| Germany                          |                          | 1 (20%)                           |                              |
| Iran                             | 1 (4%)                   |                                   |                              |
| Israel                           | 2 (9%)                   |                                   |                              |
| Netherlands                      | 1 (4%)                   |                                   | 1 (25%)                      |
| Sweden                           |                          |                                   | 1 (25%)                      |
| USA                              | 14 (61%)                 | 3 (60%)                           | 2 (50%)                      |
| UK<br>(multiple sites)           | 2 (9%)<br>1 (4%)         |                                   |                              |
| <b>Time period assessed</b>      |                          |                                   |                              |
|                                  | 1989-2008                | 1993-2007                         | 1993-2007                    |
| <b>Sample size (median, IQR)</b> |                          |                                   |                              |
| All patients                     | 4344 (IQR 2085-11963)    | 8215 (IQR 3037-8799)              | 4358 (2264-185019)           |
| RBC transfusion                  | 1068 (IQR 430-5812)      |                                   |                              |
| No RBC transfusion               | 2325 (IQR 1636-6151)     |                                   |                              |
| <b>Disease area</b>              |                          |                                   |                              |
| Cardiac surgery                  | 12 (52%)                 | 2 (40%)                           | 2 (50%)                      |
| Hip fracture/replacement         | 2 (9%)                   |                                   |                              |
| Intensive care                   | 5 (22%)                  | 1 (20%)                           |                              |
| Oncology                         | 1 (4%)                   |                                   |                              |
| Surgery                          |                          | 1 (20%)                           |                              |
| Trauma adults                    | 2 (9%)                   | 1 (20%)                           | 1 (25%)                      |
| Trauma paediatrics               | 1 (4%)                   |                                   |                              |
| Not reported                     |                          |                                   | 1 (25%)                      |
| <b>Prescribing guidance</b>      |                          |                                   |                              |
| Reported                         | 7 (30%)                  | 3 (60%)                           |                              |
| Not reported                     | 16 (70%)                 | 2 (40%)                           | 4 (100%)                     |
| <b>Mortality assessed*</b>       |                          |                                   |                              |
| In hospital                      | 8                        | 2                                 | 2                            |
| 30 days                          | 10                       | 2                                 | 1                            |
| 3 months                         | 3                        |                                   |                              |
| 6 months                         | 3                        |                                   |                              |
| >1 year                          | 4                        | 1                                 | 2                            |
| Time period not specified        | 2                        |                                   | 1                            |

\*studies reported mortality for >1 time point based on binary only and / or time-to-event outcome

Table 2: Method of adjusted analysis

| Type of comparison                              | RBCT vs. no RBCT<br>(n=23) | Volume 'A' vs. Volume 'B'<br>(n=5) | Old RBC vs. new RBC<br>(n=4) |
|-------------------------------------------------|----------------------------|------------------------------------|------------------------------|
| Choice of covariates                            |                            |                                    |                              |
| Pre-specified                                   | 13 (57%)                   | 5 (100%)                           | 4 (100%)                     |
| Post hoc                                        |                            |                                    |                              |
| Unclear                                         | 10 (43%)                   |                                    |                              |
| No. of covariates measured                      |                            |                                    |                              |
| 1-5                                             | 2 (9%)                     |                                    |                              |
| 6-10                                            | 4 (17%)                    | 1 (20%)                            | 2 (50%)                      |
| 11-20                                           | 3 (13%)                    | 2 (40%)                            |                              |
| >20                                             | 12 (52%)                   | 2 (40%)                            | 1 (25%)                      |
| Unclear                                         | 2 (9%)                     |                                    | 1 (25%)                      |
| Important covariates assessed                   |                            |                                    |                              |
| Age                                             | 23 (100%)                  | 5 (100%)                           | 4 (100%)                     |
| Sex                                             | 23 (100%)                  | 5 (100%)                           | 4 (100%)                     |
| Smoking                                         | 8 (35%)                    | 1 (20%)                            | 1 (25%)                      |
| Co-morbidity                                    | 21 (91%)                   | 5 (100%)                           | 3 (75%)                      |
| Hb level                                        | 14 (61%)                   | 4 (80%)                            | 2 (50%)                      |
| Important covariates incorporated into analysis |                            |                                    |                              |
| Yes                                             | 8 (35%)                    | 1 (20%)                            | 1 (25%)                      |
| No                                              | 15 (65%)                   | 4 (80%)                            | 3 (75%)                      |
| Method of adjustment                            |                            |                                    |                              |
| Cox proportional hazard                         | 6 (26%)                    | 1 (20%)                            | 1 (25%)                      |
| Logistic regression                             | 14 (61%)                   | 4 (80%)                            | 2 (50%)                      |
| Both *                                          | 3 (13%)                    |                                    |                              |
| Not reported                                    |                            |                                    | 1 (25%)                      |

\*studies reported >1 method of adjustment when mortality was assessed for >1 time point

**Table 3: Presentation of results for unadjusted and adjusted analysis (mortality)**

| Type of comparison                      | RBCT vs. no RBCT<br>(n=23) | Volume 'A' vs. Volume 'B'<br>(n=5) | Old RBC vs. new RBC<br>(n=4) |
|-----------------------------------------|----------------------------|------------------------------------|------------------------------|
| Summary statistic for each group        |                            |                                    |                              |
| Unadjusted only                         | 5 (22%)                    | 2 (40%)                            |                              |
| Adjusted only                           | 1 (4%)                     |                                    |                              |
| Both                                    | 7 (30%)                    |                                    | 1 (25%)                      |
| Not reported                            | 10 (44%)                   | 3 (60%)                            | 3 (75%)                      |
| Treatment effect                        |                            |                                    |                              |
| Unadjusted only                         | 1 (4%)                     |                                    |                              |
| Adjusted only                           | 12 (52%)                   | 5 (100%)                           | 2 (50%)                      |
| Both                                    | 8 (35%)                    |                                    | 1 (25%)                      |
| Not reported                            | 2 (9%)                     |                                    | 1 (25%)                      |
| Confidence interval of treatment effect |                            |                                    |                              |
| Unadjusted only                         |                            |                                    |                              |
| Adjusted only                           | 10 (43%)                   | 3 (60%)                            | 2 (50%)                      |
| Both                                    | 8 (35%)                    |                                    | 1 (25%)                      |
| Not reported                            | 5 (22%)                    | 2 (40%)                            | 1 (25%)                      |
| P-value for treatment effect            |                            |                                    |                              |
| Unadjusted only                         | 7 (30%)                    |                                    |                              |
| Adjusted only                           |                            | 1 (20%)                            |                              |
| Both                                    | 1 (4%)                     |                                    | 1 (25%)                      |
| Not reported                            | 15 (66%)                   | 4 (80%)                            | 3 (75%)                      |
| Unadjusted analysis*                    |                            |                                    |                              |
| Statistically significant               | 17 (74%)                   |                                    | 2 (50%)                      |
| Statistically non-significant           | 1 (4%)                     |                                    |                              |
| Not reported                            | 5 (22%)                    | 5 (100%)                           | 2 (50%)                      |
| Adjusted analysis*                      |                            |                                    |                              |
| Statistically significant               | 15 (65%)                   | 2 (40%)                            | 1 (25%)                      |
| Statistically non-significant           | 7 (31%)                    | 2 (40%)                            | 3 (75%)                      |
| Not reported                            | 1 (4%)                     | 1 (20%)                            |                              |

\*mortality outcome – if >1 time point analysed the time point with the non-significant result was recorded

Table 4: Assessment of methodological quality of the included studies

| Study ID                  | Data collected prospectively | Sample representative | Important covariates measured | Important covariates incorporated into analysis | Method of dealing with confounding adequate* |
|---------------------------|------------------------------|-----------------------|-------------------------------|-------------------------------------------------|----------------------------------------------|
| Aronson 2008 (3)          | Yes                          | Unclear               | Yes                           | Yes                                             | Yes                                          |
| Bernard 2009 (27)         | No                           | Yes                   | Yes                           | Yes                                             | Yes                                          |
| Bochicchio 2008 (4)       | Yes                          | Yes                   | No                            | No                                              | No                                           |
| Charles 2007 (28)         | No                           | Yes                   | No                            | No                                              | No                                           |
| Edgren 2010 (32)          | No                           | Yes                   | No                            | No                                              | No                                           |
| Engoren 2009 (5)          | No                           | Yes                   | No                            | No                                              | No                                           |
| Engoren 2009 (6)          | No                           | Yes                   | No                            | No                                              | No                                           |
| Garty 2009 (7)            | No                           | Yes                   | Yes                           | Yes                                             | Yes                                          |
| Jani 2007 (8)             | No                           | No (>60 years)        | Yes                           | Yes                                             | Yes                                          |
| Johnson 2006 (9)          | No                           | Unclear               | No                            | No                                              | No                                           |
| Khorana 2008 (10)         | No                           | Yes                   | No                            | No                                              | No                                           |
| Koch 2006 (11,12)         | Yes                          | Yes                   | Yes                           | Yes                                             | Yes                                          |
| Koch 2008 (33)            | No                           | Yes                   | Yes                           | Yes                                             | Yes                                          |
| Murphy 2007 (13)          | No                           | Yes                   | Yes                           | Yes                                             | Yes                                          |
| Nikolsky 2009 (14)        | Yes                          | Yes                   | Yes                           | Yes                                             | Yes                                          |
| O'Keefe 2010 (29)         | Yes                          | Yes                   | No                            | No                                              | No                                           |
| Pederson 2009 (15)        | No                           | Yes                   | No                            | No                                              | No                                           |
| Rogers 2006 (16)          | No                           | No (>65 years)        | No                            | No                                              | No                                           |
| Rogers 2009 (17)          | No                           | No (> 65 years)       | No                            | No                                              | No                                           |
| Ruttinger 2007 (30)       | No                           | Yes                   | No                            | No                                              | No                                           |
| Salehiomran 2009 (18)     | No                           | Yes                   | Yes                           | Yes                                             | Yes                                          |
| Stone 2008 (19)           | No                           | No (< 16 years))      | No                            | No                                              | No                                           |
| Surgenor 2009 (20)        | Yes                          | Yes                   | No                            | No                                              | No                                           |
| Taylor 2006 (21)          | Yes                          | Yes                   | No                            | No                                              | No                                           |
| van de Watering 2006 (34) | No                           | Yes                   | No                            | No                                              | No                                           |
| van Straten 2010 (22)     | Yes                          | Yes                   | No                            | No                                              | No                                           |
| Vincent 2008 (23)         | Yes                          | Yes                   | No                            | No                                              | No                                           |
| Weightman 2009 (31)       | Yes                          | Yes                   | No                            | No                                              | No                                           |
| Weinburg 2008 (24)        | No                           | Yes                   | No                            | No                                              | No                                           |
| Weinburg 2008 (35)        | No                           | Yes                   | No                            | No                                              | No                                           |

1  
2  
3  
4  
5  
6  
7  
8  
9  
10  
11  
12  
13  
14  
15  
16  
17  
18  
19  
20  
21  
22  
23  
24  
25  
26  
27  
28  
29  
30  
31  
32  
33  
34  
35  
36  
37  
38  
39  
40  
41  
42  
43  
44  
45  
46  
47  
48  
49  
50  
51  
52  
53  
54  
55  
56  
57  
58  
59  
60

|                      |    |                 |     |     |     |
|----------------------|----|-----------------|-----|-----|-----|
| Wu 2010 (25)         | No | No (> 65 years) | Yes | Yes | Yes |
| Zilberberg 2008 (26) | No | Yes             | No  | No  | No  |

\*The method of dealing with confounding was deemed adequate if important covariates were measured and adjusted for in the analysis.

For peer review only

**APPENDIX 1: Search strategies****MEDLINE (Ovid)**

1. ERYTHROCYTE TRANSFUSION/
2. \*BLOOD TRANSFUSION/
3. (hemotransfus\* or haemotransfus\*).tw.
4. ((transfus\* or retransfus\*) adj1 (trigger\* or level\* or threshold\* or rule\* or restrict\* or limit\*)).tw.
5. (transfusion\* adj1 (management or practice\* or polic\* or strateg\* or guideline\* or indication\* or protocol\* or criteri\*)).tw.
6. ((blood adj1 management) or (management adj1 blood) or (blood adj1 support) or (blood adj1 requirement\*)).tw.
7. ((red cell\* adj1 management) or (red cell\* adj1 support) or (red cell adj1 requirement\*)).tw.
8. (blood adj1 need\*).tw. or transfus\*.ti.
9. or/1-8
10. BLOOD TRANSFUSION/
11. ERYTHROCYTES/
12. (red cell\* or red blood cell\* or erythrocyte\* or RBC\*).tw.
13. 11 or 12
14. 10 and 13
15. (critical\* or intensive or trauma or surg\* or injur\* or postinjur\* OR organ failure\* OR sepsis or septic OR infection\* OR infectious OR ARDS OR acute respiratory distress OR multiorgan).ti. and transfus\*.ab.
16. 9 or 14 or 15
17. BLOOD PRESERVATION/
18. transfus\*.mp.
19. 17 and 18
20. ((storage or stored or storing or age\* or aging or old or older or duration or fresh\* or preserv\* or conserv\*) adj2 (whole blood or red blood cell\* or red cell\* or RBC\*)).tw. and transfus\*.mp.
21. (fresh blood or new blood or old\* blood or fresh red blood cells or new red blood cells or old\* red blood cells or fresh red cells or new red cells or old\* red cells).tw.
22. 16 or 19 or 20 or 21
23. PROGNOSIS/
24. DISEASE FREE SURVIVAL/
25. exp CRITICAL CARE/
26. TREATMENT FAILURE/
27. exp MORTALITY/
28. SURVIVAL/
29. SURVIVAL ANALYSIS/
30. RISK ASSESSMENT/ or RISK FACTORS/
31. TREATMENT OUTCOME/
32. (survival\* or survivor\* or nonsurvivor\* or survived or surviving).ti,ab.
33. ((predictor\* or prediction\*) adj1 death).tw.
34. (prognos\* or mortality).tw.
35. (outcome\* adj2 (therap\* or treatment\*)).ti,ab.
36. ((risk adj assessment) or (associated adj risk)).tw.
37. (risk\* or association\* or causalit\* or causation or cause\*).ti.
38. exp POSTOPERATIVE COMPLICATIONS/
39. exp INTRAOPERATIVE COMPLICATIONS/

40. or/23- 39
41. 22 and 40
42. BLOOD TRANSFUSION/ae, co, mo, ut or ERYTHROCYTE TRANSFUSION/ae, co, mo, ut
43. ((reaction\* or effect\* or efficac\* or complication\* or risk\* or adverse\* or hazard\* or accident\* or incident\* or morbid\* or death\* or mortalit\* or outcome\*) adj3 (transfus\* or postransfus\* or RBC\* or red cell\* or erythrocyte\*)).tw.
44. (transfus\* or posttransfus\*).ti.
45. or/41-44
46. EPIDEMIOLOGIC STUDIES/
47. exp CASE CONTROL STUDIES/
48. exp COHORT STUDIES/
49. (case\* adj2 control\*).tw.
50. cohort\*.ti,ab.
51. (follow up adj (study or studies)).tw.
52. (observational adj2 (study or studies)).tw.
53. ((controlled adj2 trial\*1) or (controlled adj2 stud\*) or (comparative adj trial\*) or (comparative adj stud\*) or (comparison adj group\*) or (comparator adj group\*)).tw.
54. longitudinal.tw.
55. retrospective\*.tw.
56. cross sectional.tw.
57. CROSS-SECTIONAL STUDIES/
58. Controlled clinical trial.pt.
59. CROSSOVER STUDIES/
60. Comparative study.pt.
61. CLINICAL TRIALS AS TOPIC/
62. exp CONTROLLED CLINICAL TRIALS AS TOPIC/
63. (nonrandomi\* or (non adj randomi\*)).tw.
64. or/46-63
65. 45 and 64

#### EMBASE (Ovid)

1. ERYTHROCYTE TRANSFUSION/
2. \*BLOOD TRANSFUSION/ or \*BLOOD COMPONENT THERAPY/
3. (hemotransfus\* or haemotransfus\*).tw.
4. ((transfus\* or retransfus\*) adj1 (trigger\* or level\* or threshold\* or rule\* or restrict\* or limit\*)).tw.
5. (transfusion\* adj1 (management or practice\* or polic\* or strateg\* or guideline\* or indication\* or protocol\* or criteri\*)).tw.
6. ((blood adj1 management) or (management adj1 blood) or (blood adj1 support) or (blood adj1 requirement\*)).tw.
7. ((red cell\* adj1 management) or (red cell\* adj1 support) or (red cell adj1 requirement\*)).tw.
8. (blood adj1 need\*).tw. or transfus\*.ti.
9. or/1-8
10. BLOOD TRANSFUSION/
11. ERYTHROCYTE/
12. (red cell\* or red blood cell\* or erythrocyte\* or RBC\*).tw.
13. 11 or 12
14. 10 and 13



15. (critical\* or intensive or trauma or surg\* or injur\* or postinjur\* OR organ failure\* OR sepsis or septic OR infection\* OR infectious OR ARDS OR acute respiratory distress OR multiorgan).ti. and transfus\*.ab.
16. 9 or 14 or 15
17. BLOOD STORAGE/ or ERYTHROCYTE PRESERVATION/
18. transfus\*.mp.
19. 17 and 18
20. ((storage or stored or storing or age\* or aging or old or older or duration or fresh\* or preserv\* or conserv\*) adj2 (whole blood or red blood cell\* or red cell\* or RBC\*)).tw. and transfus\*.mp.
21. (fresh blood or new blood or old\* blood or fresh red blood cells or new red blood cells or old\* red blood cells or fresh red cells or new red cells or old\* red cells).tw.
22. 16 or 19 or 20 or 21
23. PROGNOSIS/
24. exp SURVIVAL/
25. exp INTENSIVE CARE/
26. exp TREATMENT OUTCOME/
27. exp EPIDEMIOLOGY/
28. RISK ASSESSMENT/ or
29. RISK BENEFIT ANALYSIS/ or RISK FACTOR/
30. RISK MANAGEMENT/
31. RISK REDUCTION/
32. (survival\* or survivor\* or nonsurvivor\* or survived or surviving).ti,ab.
33. ((predictor\* or prediction\*) adj1 death).tw.
34. (prognos\* or mortality).tw.
35. (outcome\* adj2 (therap\* or treatment\*)).ti,ab.
36. (risk assessment or associated risk).tw.
37. (risk\* or association\* or causalit\* or causation or cause\*).ti.
38. exp POSTOPERATIVE COMPLICATION/
39. PEROPERATIVE COMPLICATION/
40. or/23-39
41. 22 and 40
42. ((reaction\* or effect\* or efficac\* or complication\* or risk\* or adverse\* or hazard\* or accident\* or incident\* or morbid\* or death\* or mortalit\* or outcome\*) adj3 (transfus\* or postransfus\* or RBC\* or red cell\* or erythrocyte\*)).tw.
43. (transfus\* and posttransfus\*).ti.
44. or/41-43
45. Clinical Study/
46. exp Case Control Study/
47. Family Study/
48. Longitudinal Study/
49. Retrospective Study/
50. Prospective Study/
51. Randomized Controlled Trials/
52. 50 not 51
53. Cohort Analysis/
54. Comparative Study/
55. cohort\*.ti,ab.
56. (case\* adj2 control\*).tw.
57. (follow up adj (study or studies)).tw.
58. (observational adj2 (study or studies)).tw.

1  
2  
3  
4  
5  
6  
7  
8  
9  
10  
11  
12  
13  
14  
15  
16  
17  
18  
19  
20  
21  
22  
23  
24  
25  
26  
27  
28  
29  
30  
31  
32  
33  
34  
35  
36  
37  
38  
39  
40  
41  
42  
43  
44  
45  
46  
47  
48  
49  
50  
51  
52  
53  
54  
55  
56  
57  
58  
59  
60

- 59. (epidemiologic\* adj (study or studies)).tw.
- 60. (cross sectional adj (study or studies)).tw.
- 61. (retrospective\* or longitudinal\*).tw.
- 62. ((controlled adj2 trial\*1) or (controlled adj2 stud\*) or (comparative adj trial\*) or (comparative adj stud\*) or (comparison adj group\*) or (comparator adj group\*)).tw.
- 63. (nonrandomi\* or (non adj randomi\*)).tw.
- 64. or/45-49, 52-63
- 65. 44 and 64

For peer review only

## APPENDIX 2: Characteristics of included studies

| Study ID                                                               | Design                                                                                                                                                                                                           | Objective                                                                                      | Participants                                                           | Intervention (exposure)                                                                                                | Comparator (control)                               | Outcome                               |
|------------------------------------------------------------------------|------------------------------------------------------------------------------------------------------------------------------------------------------------------------------------------------------------------|------------------------------------------------------------------------------------------------|------------------------------------------------------------------------|------------------------------------------------------------------------------------------------------------------------|----------------------------------------------------|---------------------------------------|
| <b>Red blood cells versus no red blood cells – prospective studies</b> |                                                                                                                                                                                                                  |                                                                                                |                                                                        |                                                                                                                        |                                                    |                                       |
| Aronson 2008 (3)                                                       | Design: prospective cohort<br>How pts recruited: admitted to intensive care unit<br>Country: Israel<br>Year: 2000 to 2006<br>Funding: not reported                                                               | Effects of RBCT in patients with acute myocardial infarction                                   | Adults with acute MI in an intensive coronary care unit (n=2358)       | RBCT (n=192)<br><br>Prescribing guidance: not reported                                                                 | No RBCT(n=2134)                                    | Mortality at 6 months #               |
| Bochicchio 2008 (4)                                                    | Design: prospective cohort<br>How pts recruited: admitted to Adams Cowley Shock Trauma Centre<br>Country: USA<br>Year: 2002 to 2004<br>Funding: not reported                                                     | Effects of RBC and other blood product transfusion (RBC and FFP) on outcome in trauma patients | Adults admitted to intensive care unit (n=1172)                        | RBC and other blood product transfusion (n=786); RBC only (n=246)<br><br>Prescribing guidance: no formal protocol used | No RBC or other blood product transfusion (n=386). | Mortality (time period not specified) |
| Koch 2006 (11,12)                                                      | Design: prospective cohort<br>How pts recruited: admitted to large tertiary hospital (Cleveland Clinic)<br>Country: USA<br>Year: 1995 to 2002<br>Funding: Non industry funded                                    | Effect of RBCT on mortality in patients undergoing coronary artery bypass surgery              | Adults undergoing coronary artery bypass grafting (n=11963)            | RBCT (n=5812)<br><br>Prescribing guidance: not reported                                                                | No RBCT(n=6151)                                    | Mortality in-hospital                 |
| Nikolsky 2009 (14)                                                     | Design: prospective cohort<br>How pts recruited: part of CADILLAC randomized trial comparing different mechanical reperfusion strategies<br>Country: multi centre<br>Year: 1997 to 1999<br>Funding: not reported | Effect of RBCT in patients undergoing angioplasty for acute myocardial infarction              | Adults undergoing angioplasty for acute myocardial infarction (n=2060) | RBCT (n=82)<br><br>Prescribing guidance: not reported                                                                  | No RBCT (n=1978)                                   | Mortality at 30 days and 1 year #     |
| Surgenor 2009 (20)                                                     | Design: prospective cohort<br>How pts recruited: admitted to one of eight medical centres as part of the Northern New                                                                                            | Effect of RBCT on mortality in patients undergoing coronary artery bypass surgery              | Adults undergoing coronary artery bypass surgery (n=9079)              | RBCT (n=3254)<br><br>Prescribing guidance: reported as at the                                                          | No RBCT (n=5825)                                   | Mortality over 5 years #              |

|                                                                          |                                                                                                                                                                                          |                                                                                                       |                                                               |                                                                                                  |                                       |                                               |
|--------------------------------------------------------------------------|------------------------------------------------------------------------------------------------------------------------------------------------------------------------------------------|-------------------------------------------------------------------------------------------------------|---------------------------------------------------------------|--------------------------------------------------------------------------------------------------|---------------------------------------|-----------------------------------------------|
|                                                                          | England Cardiovascular Disease Study Group<br>Country: USA<br>Year: 2001 to 2004<br>Funding: not reported                                                                                |                                                                                                       |                                                               | discretion of the patient care team                                                              |                                       |                                               |
| Taylor 2006 (21)                                                         | Design: prospective cohort<br>How pts recruited: admitted to intensive care unit at the St John's Mercy Medical Centre<br>Country: USA<br>Year: 2001 to 2003<br>Funding: not reported    | Effect of RBCT on nosocomial infection and mortality in critically ill patients                       | Adults admitted to critical care unit (n=2085)                | RBCT (n=449)<br><br>Prescribing guidance: reported as at the discretion of the patient care team | No RBCT (n=1636)                      | Mortality (time period not specified)         |
| Van Straten 2010 (22)                                                    | Design: prospective cohort<br>How pts recruited: admitted to hospital (centre not specified)<br>Country: Netherlands<br>Year: 1998 to 2007<br>Funding: not reported                      | Effect of RBCT on long and short term survival in patients undergoing coronary artery bypass grafting | Patients undergoing coronary artery bypass grafting (n=10425) | RBCT (n=3597)<br><br>Prescribing guidance: not reported                                          | No RBCT (n=6828)                      | Mortality ≤ 30 days and mortality > 30 days # |
| Vincent 2008 (23)                                                        | Design: prospective cohort<br>How pts recruited: admitted to European intensive care unit (n=198 units)<br>Country: Belgium<br>Year: 1 May to 15 May 2002<br>Funding: industry supported | Effect of RBCT on mortality in European intensive care units                                          | Adults admitted intensive care unit (n=3147)                  | RBCT (n=1040)<br><br>Prescribing guidance: not reported                                          | No RBCT (n=2107)                      | Mortality in hospital at 30 days #            |
| <b>Red blood cells versus no red blood cells – retrospective studies</b> |                                                                                                                                                                                          |                                                                                                       |                                                               |                                                                                                  |                                       |                                               |
| Engoren 2009 (5)                                                         | Design: retrospective database<br>How pts recruited: admitted to St Vincent Mercy Medical Centre intensive care unit<br>Country: USA<br>Year: 2001 to 2002<br>Funding: not reported      | Effects of RBCT in critically ill patients (excluded cardiac surgery patients)                        | Adults admitted to intensive care unit (n=2213)               | RBCT (n=404)<br><br>Prescribing guidance: haemoglobin <8 g/dl                                    | No RBCT (n=1809)                      | Mortality at 30 days and 180 days #           |
| Engoren 2009 (6)                                                         | Design: retrospective database<br>How pts recruited: admitted to St Vincent Mercy Medical Centre                                                                                         | Effects of RBCT in cardiac surgery patients                                                           | Adults admitted for cardiac surgery (n=1823)                  | RBCT (n=378)<br><br>CABG and value                                                               | No RBCT (n=615)<br><br>CABG and value | Mortality within 30 days >30 days             |

|                   |                                                                                                                                                                                                                                                          |                                                                                                                                                                       |                                                                                        |                                                                                                      |                                           |                                                      |
|-------------------|----------------------------------------------------------------------------------------------------------------------------------------------------------------------------------------------------------------------------------------------------------|-----------------------------------------------------------------------------------------------------------------------------------------------------------------------|----------------------------------------------------------------------------------------|------------------------------------------------------------------------------------------------------|-------------------------------------------|------------------------------------------------------|
|                   | for cardiac surgery<br>Country: USA<br>Year: 1991 to 2007<br>Funding: not reported                                                                                                                                                                       |                                                                                                                                                                       |                                                                                        | RBCT (n=534)<br><br>Prescribing guidance: not reported                                               | No RBCT (n=296)                           |                                                      |
| Garty 2009 (7)    | Design: retrospective database<br>How pts recruited: admitted to cardiac or internal medicine ward in 25 public hospitals<br>Country: Israel<br>Year: 2003<br>Funding: Non industry funded                                                               | Effect of RBCT (unclear if included other blood products) on patients with acute decompressed heart failure                                                           | Adults with acute decompressed heart failure (n=2335)                                  | RBCT (n=166)<br><br>Prescribing guidance: not reported                                               | No RBCT(n=2169)                           | Mortality in-hospital, 30 days, 1 year and 4 years # |
| Jani 2007 (8)     | Design: retrospective database (Blue Cross Blue Shield of Michigan Cardiovascular Consortium)<br>How pts recruited: admitted to academic medical centres<br>Country: USA<br>Year: 1997 to 2004<br>Funding: Blue Cross Blue Shield of Michigan            | Effect of RBCT and other blood product on in-patient mortality in anaemic patients undergoing percutaneous coronary intervention (PCI) for myocardial infarction (MI) | Adults (>60 years) with anaemia undergoing PCI within 7 days for having a MI (n=4623). | RBCT and other blood product (n=1033)<br><br>Prescribing guidance: no formal protocol used           | No RBCT or other blood product (n=3590).  | Mortality in-hospital                                |
| Johnson 2006 (9)  | Design: retrospective database<br>How pts recruited: admitted to orthopaedic unit (District General Hospital, Peterborough)<br>Country: UK<br>Year: 1989 to 2002<br>Funding: Non industry funded                                                         | Effect of RBCT (unclear if included other blood products) on mortality in patients with hip fracture                                                                  | Adults admitted to orthopaedic unit with hip fracture (n=3625)                         | RBCT (n=1068)<br><br>Prescribing guidance: haemoglobin <8 g/dl                                       | No RBCT (n=2503)                          | Mortality at 30, 120 and 365 days #                  |
| Khorana 2008 (10) | Design: retrospective database (University Health System Consortium)<br>How pts recruited: admitted to academic medical centres<br>Country: USA<br>Year: 1995 to 2003<br>Funding: National Cancer Institute and National Heart, Lung and Blood Institute | Effect of RBCT and other blood product on thrombosis and mortality in hospitalised patients with cancer                                                               | Adults with cancer admitted to hospital (n=504208)                                     | RBCT and other blood product (n=74051); RBC only (n=58814)<br><br>Prescribing guidance: not reported | No RBCT or other blood product (n=430157) | Mortality in-hospital                                |

|                    |                                                                                                                                                                                                                                                                                     |                                                                                                                         |                                                                               |                                                                                  |                                         |                                                            |
|--------------------|-------------------------------------------------------------------------------------------------------------------------------------------------------------------------------------------------------------------------------------------------------------------------------------|-------------------------------------------------------------------------------------------------------------------------|-------------------------------------------------------------------------------|----------------------------------------------------------------------------------|-----------------------------------------|------------------------------------------------------------|
| Murphy 2007 (13)   | Design: 3 retrospective databases (PATS (Patient analysis and Tracking System), haematological and blood bank studys)<br>How pts recruited: admitted to Bristol Royal Infirmary for adult cardiac surgery<br>Country: UK<br>Year: 1996 to 2003<br>Funding: British Heart Foundation | Effect of RBCT on mortality, post operative morbidity and cost in patients undergoing cardiac surgery                   | Adults > 16 years undergoing cardiac surgery (n=8598)                         | RBCT (n=4909)<br><br>Prescribing guidance: not reported                          | No RBCT (n=3689)                        | Mortality up to 7 years post surgery (median 4.15 years) # |
| Pederson 2009 (15) | Design: retrospective database (Danish Hip Arthroplasty Registry)<br>How pts recruited: admitted from 20 orthopaedic departments<br>Country: Denmark<br>Year: 1999 to 2007<br>Funding: not reported                                                                                 | Effect of RBCT on mortality in patients undergoing total hip replacement                                                | Adults undergoing surgery for total hip replacement (n=28087)                 | RBCT (n=9063)<br><br>Prescribing guidance: not reported                          | No RBCT (n=19024)                       | Mortality at 90 days                                       |
| Rogers 2006 (16)   | Design: retrospective database (Center for Medicare and Medicaid Services)<br>How pts recruited: Medicare beneficiaries hospitalised for coronary artery bypass surgery<br>Country: USA<br>Year: 1997 to 1998<br>Funding: non industry funded                                       | Effect of RBCT on mortality in patients undergoing coronary artery bypass surgery                                       | Older adults (> 65 Years) undergoing coronary artery bypass surgery (n=9218)  | RBCT (n=6893)<br><br>Prescribing guidance: not reported                          | No RBCT (n=2325)                        | Mortality within 100 days                                  |
| Rogers 2009 (17)   | Design: retrospective database<br>How pts recruited: Medicare beneficiaries who received coronary artery bypass surgery<br>Country: USA<br>Year: 2003 to 2006<br>Funding: Michigan Foundation                                                                                       | Effect of RBCT and other blood product on infection and mortality in patients undergoing coronary artery bypass surgery | Older adults (> 65 years) undergoing coronary artery bypass surgery (n=24789) | RBCT and other blood product (n=20789)<br><br>Prescribing guidance: not reported | No RBCT or other blood product (n=4000) | Mortality in hospital and at 30 days post discharge        |

|                       |                                                                                                                                                                                                                                                                                        |                                                                                                                              |                                                                              |                                                                                              |                    |                       |
|-----------------------|----------------------------------------------------------------------------------------------------------------------------------------------------------------------------------------------------------------------------------------------------------------------------------------|------------------------------------------------------------------------------------------------------------------------------|------------------------------------------------------------------------------|----------------------------------------------------------------------------------------------|--------------------|-----------------------|
| Salehiomran 2009 (18) | Design: retrospective database<br>How pts recruited: patients admitted to Tehran Heart Centre who received coronary artery bypass surgery<br>Country: Iran<br>Year: 2002 to 2008<br>Funding: not reported                                                                              | Effect of RBCT (unclear if included other blood products) on mortality in patients undergoing coronary artery bypass surgery | Adults undergoing coronary artery bypass surgery (n=14152)                   | RBCT (n=2333)<br><br>Prescribing guidance: hematocrit <25-26%                                | No RBCT (n=11773)  | Mortality at 30 days  |
| Stone 2008 (19)       | Design: retrospective database<br>How pts recruited: admitted to paediatric trauma centre<br>Country: USA<br>Year: 1998 to 2006<br>Funding: not reported                                                                                                                               | Effect of RBCT on mortality in paediatric trauma patients                                                                    | Children with blunt or penetrating injury admitted to trauma centre (n=1639) | RBCT (n=106)<br><br>Prescribing guidance: reported no specific transfusion protocol was used | No RBCT (n=1533)   | Mortality in-hospital |
| Weinberg 2008 (24)    | Design: retrospective database<br>How pts recruited: admitted to trauma centre at University of Alabama<br>Country: USA<br>Year: 2000 to 2007<br>Funding: not reported                                                                                                                 | Effect of RBCT on mortality in trauma patients                                                                               | Less severely injured adults admitted to trauma centre (n=1624)              | RBCT (n=430)<br><br>Prescribing guidance: not reported                                       | No RBCT (n=1194)   | Mortality in hospital |
| Wu 2010 (25)          | Design: retrospective database (Department of Veteran Affairs and National Surgical Quality Improvement Program)<br>How pts recruited: admitted to one of 142 veteran hospitals and requiring major non cardiac surgery<br>Country: USA<br>Year: 1997 to 2004<br>Funding: not reported | Effect of RBCT on mortality in older adults after major non cardiac surgery                                                  | Older adults (>65 years) undergoing major non cardiac surgery (n=239286)     | RBCT(n=22515)<br><br>Prescribing guidance: not reported                                      | No RBCT (n=216771) | Mortality at 30 days  |
| Zilberberg 2008 (26)  | Design: retrospective database (Henry Ford Health System includes data from 7 hospitals in USA)<br>How pts recruited: admitted to hospital and requiring                                                                                                                               | Effect of RBCT on mortality in critically ill patients requiring prolonged ventilation                                       | Adults critically ill and requiring prolonged ventilation 96 ≥hours (n=4344) | RBCT (n=2912)<br><br>Prescribing guidance: not reported                                      | No RBCT (n=1432)   | Mortality in-hospital |

|                                                                     |                                                                                                                                                                                                                                                     |                                                                                      |                                                                              |                                                                                                                                                                                               |                                                                                                                                                                                                       |                       |
|---------------------------------------------------------------------|-----------------------------------------------------------------------------------------------------------------------------------------------------------------------------------------------------------------------------------------------------|--------------------------------------------------------------------------------------|------------------------------------------------------------------------------|-----------------------------------------------------------------------------------------------------------------------------------------------------------------------------------------------|-------------------------------------------------------------------------------------------------------------------------------------------------------------------------------------------------------|-----------------------|
|                                                                     | ventilation<br>Country: USA<br>Year: 2000 to 2005<br>Funding: industry supported                                                                                                                                                                    |                                                                                      |                                                                              |                                                                                                                                                                                               |                                                                                                                                                                                                       |                       |
| <b>Volume 'A' red blood cells versus volume 'B' red blood cells</b> |                                                                                                                                                                                                                                                     |                                                                                      |                                                                              |                                                                                                                                                                                               |                                                                                                                                                                                                       |                       |
| Bernard 2009<br>(27)                                                | Design: retrospective database<br>How pts recruited: admitted to hospital and requiring major surgery<br>Country: USA<br>Year: 2005 to 2006<br>Funding: industry supported                                                                          | Effect of RBCT and volume of blood in patients undergoing major surgery              | Adults undergoing major surgery (n=125177)                                   | Volume of RBCT (classified as: 0 units RBC, 1 unit, 2 units, 3-4 units, 5-9 units >10 units intra operative and >4 units post operative)<br><br>Prescribing guidance: no formal protocol used | Another volume of RBCT (classified as: 0 units RBC, 1 unit, 2 units, 3-4 units, 5-9 units >10 units intra operative and >4 units post operative)<br><br>Prescribing guidance: no formal protocol used | Mortality at 30 days  |
| Charles 2007<br>(28)                                                | Design: retrospective database (NTRACS trauma registry)<br>How pts recruited: admitted to Level 2 trauma centre<br>Country: USA<br>Year: 1994 to 2004<br>Funding: not reported                                                                      | Effect of RBCT and volume of blood in patients with blunt trauma injuries            | Adults >18 yrs with blunt trauma injuries admitted to trauma centre (n=8215) | Volume of RBCT (classified as: 0 units RBC, 1-2 units, 3-5 units, >6 units)<br><br>Prescribing guidance: no formal protocol used                                                              | Another volume of RBCT (classified as: 0 units RBC, 1-2 units, 3-5 units, >6 units)<br><br>Prescribing guidance: no formal protocol used                                                              | Mortality at 24 hours |
| O'Keefle 2010<br>(29)                                               | Design: retrospective database (American College of Surgeons National Quality Improvement Program)<br>How pts recruited: admitted from 173 hospitals and undergoing vascular surgery<br>Country: USA<br>Year: 2005 to 2007<br>Funding: not reported | Effect of RBCT on mortality in patients undergoing lower extremity revascularization | Adults with peripheral arterial disease (n=8799)                             | Volume of RBCT (classified as: 0 units RBC, 1 to 2 and >3 units)<br><br>Prescribing guidance: not reported                                                                                    | Another volume of RBCT (classified as: 0 units RBC, 1 to 2 and >3 units)<br><br>Prescribing guidance: not reported                                                                                    | Mortality at 30 days  |
| Ruttinger 2007<br>(30)                                              | Design: retrospective database<br>How pts recruited: admitted to surgical intensive care unit LMU University Hospital., Munich<br>Country: Germany                                                                                                  | Effect of RBCT on mortality in critically ill patients                               | Patients admitted to intensive care unit (n=3037)                            | Volume of RBCT (classified as: 1 to 2 units (n=676) RBC, 3 to 4 (n=345), 5 to 8 (n=301) and >8 units                                                                                          | Another volume of RBCT (classified as: 1 to 2 units RBC, 3 to 4, 5 to 8 and >8 units)                                                                                                                 | Mortality in-hospital |



|                                                              |                                                                                                                                                                                                                                                                            |                                                                                                                                       |                                                                                                                   |                                                                                                                                                                                                   |                                                                                                                                                                     |                                                            |
|--------------------------------------------------------------|----------------------------------------------------------------------------------------------------------------------------------------------------------------------------------------------------------------------------------------------------------------------------|---------------------------------------------------------------------------------------------------------------------------------------|-------------------------------------------------------------------------------------------------------------------|---------------------------------------------------------------------------------------------------------------------------------------------------------------------------------------------------|---------------------------------------------------------------------------------------------------------------------------------------------------------------------|------------------------------------------------------------|
|                                                              | Year: 1993 to 2005<br>Funding: not reported                                                                                                                                                                                                                                |                                                                                                                                       |                                                                                                                   | (n=471)<br><br>Prescribing guidance:<br>haemoglobin <8-9 g/dl                                                                                                                                     | Prescribing guidance:<br>haemoglobin <8-9 g/dl                                                                                                                      |                                                            |
| Weightman<br>2009 (31)                                       | Design: prospective cohort<br>How pts recruited: admitted to<br>Sir Charles Gairdner hospital<br>Country: Australia<br>Year: 1993 to 2000<br>Funding: not reported                                                                                                         | Effect of RBCT and<br>other blood product<br>on long term survival<br>in patients<br>undergoing coronary<br>artery bypass<br>grafting | Patients undergoing<br>coronary artery bypass<br>grafting (n=1841) and<br>survived longer than 60<br>days         | Volume of RBCT and<br>other blood product<br>(classified as: 0 units<br>(n=779), 1-2 units<br>(n=402), 3-6 units<br>(n=333) and > 6units<br>(n=327))<br><br>Prescribing guidance: not<br>reported | Another volume of<br>RBCT and other blood<br>product (classified as:<br>0 units, 1-2 units, 3-6<br>units and > 6units)<br><br>Prescribing guidance:<br>not reported | Mortality (mean<br>follow up 8.1<br>years)#                |
| <b>'Older' red blood cells versus 'newer' red blood cell</b> |                                                                                                                                                                                                                                                                            |                                                                                                                                       |                                                                                                                   |                                                                                                                                                                                                   |                                                                                                                                                                     |                                                            |
| Edgren 2010<br>(32)                                          | Design: retrospective database<br>How pts recruited: received<br>blood transfusion as recorded in<br>Scandinavian Donations and<br>Transfusion Study<br>Country: Sweden and Denmark<br>Year: 1995 to 2002<br>Funding: National Heart, Lung<br>and Blood Institute of NIH   | Effect of RBCT<br>duration of storage<br>on mortality                                                                                 | Adults receiving $\geq 1$ RBC<br>transfusion (n=364037)                                                           | RBCT stored for 0-9<br>days, 10-19 days, 20-29<br>days, 30-42 days<br><br>Prescribing guidance: no<br>formal protocol used                                                                        | RBCT stored for 0-9<br>days, 10-19 days, 20-<br>29 days, 30-42 days<br><br>Prescribing guidance:<br>no formal protocol<br>used                                      | Mortality $\leq 7$ days<br>and mortality 8 to<br>730 days# |
| Koch 2008 (33)                                               | Design: retrospective database<br>(Cleveland clinic blood bank and<br>cardiac registries)<br>How pts recruited: admitted to<br>Cleveland Clinic<br>Country: USA<br>Year: 1998 to 2006<br>Funding: National Institute for<br>Health Research and Joseph<br>Drown Foundation | Effect of RBCT<br>duration of storage<br>on mortality and<br>serious complication<br>in patients<br>undergoing cardiac<br>surgery     | Adults >18 years<br>undergoing coronary-<br>artery bypass grafting,<br>cardiac-valve surgery, or<br>both (n=6002) | RBCT stored for $\leq 14$<br>days (n=2872)<br><br>Prescribing guidance: no<br>formal protocol used                                                                                                | RBCT stored for >14<br>days (n=3130)<br><br>Prescribing guidance:<br>no formal protocol<br>used                                                                     | Mortality in-hospital<br>and at 1 year                     |
| Van de Watering<br>2006 (34)                                 | Design: retrospective database<br>(Leiden University Medical<br>Centre)                                                                                                                                                                                                    | Effect of RBCT<br>duration of storage<br>on mortality in                                                                              | Adults undergoing<br>cardiothoracic surgery<br>(n=2715)                                                           | RBCT stored for <18<br>days (n=942)                                                                                                                                                               | RBCT stored for >18<br>days (n=941)                                                                                                                                 | Mortality at 30<br>days#                                   |

1  
2  
3  
4  
5  
6  
7  
8  
9  
10  
11  
12  
13  
14  
15  
16  
17  
18  
19  
20  
21  
22  
23  
24  
25  
26  
27  
28  
29  
30  
31  
32  
33  
34  
35  
36  
37  
38  
39  
40  
41  
42  
43  
44  
45  
46  
47  
48  
49

|                    |                                                                                                                                                                        |                                                                                                  |                                                            |                                                                               |                                                                               |                                       |
|--------------------|------------------------------------------------------------------------------------------------------------------------------------------------------------------------|--------------------------------------------------------------------------------------------------|------------------------------------------------------------|-------------------------------------------------------------------------------|-------------------------------------------------------------------------------|---------------------------------------|
|                    | How pts recruited: admitted to cardiothoracic surgery unit<br>Country: Netherlands<br>Year: 1993 to 1999<br>Funding: none industry                                     | cardiac patients                                                                                 |                                                            | Prescribing guidance: no formal protocol used                                 | Prescribing guidance: no formal protocol used                                 |                                       |
| Weinberg 2008 (35) | Design: retrospective database<br>How pts recruited: admitted to trauma centre at University of Alabama<br>Country: USA<br>Year: 2000 to 2007<br>Funding: not reported | Effect of leukodepleted RBCT transfusion and duration of storage on mortality in trauma patients | Severely injured adults admitted to trauma centre (n=1813) | RBCT stored for <14 days<br><br>Prescribing guidance: no formal protocol used | RBCT stored for ≥14 days<br><br>Prescribing guidance: no formal protocol used | Mortality (time period not specified) |

RBCT=red blood cell transfusion; NR: not reported; #time-to-event outcome

Peer review only

## APPENDIX 3: Statistical methods and presentation of unadjusted and adjusted results of the included studies

| Study ID                                                               | Study covariates                                                                                                                                       | Comparison                                                                                                       | Unadjusted results                                                       | Adjusted results                                                                                                                              | Method of adjustment                                                                                                                                                   |
|------------------------------------------------------------------------|--------------------------------------------------------------------------------------------------------------------------------------------------------|------------------------------------------------------------------------------------------------------------------|--------------------------------------------------------------------------|-----------------------------------------------------------------------------------------------------------------------------------------------|------------------------------------------------------------------------------------------------------------------------------------------------------------------------|
| <b>Red blood cells versus no red blood cells – prospective studies</b> |                                                                                                                                                        |                                                                                                                  |                                                                          |                                                                                                                                               |                                                                                                                                                                        |
| Aronson 2008 (3)                                                       | Number covariates: 16<br>Age: Yes<br>Sex: Yes<br>Smoking: Yes<br>Co-morbidity: Yes<br>Hb level: Yes<br>Covariates pre-specified                        | RBCT versus no RBCT<br><br>Mortality at 6 months#                                                                | RBCT (n): NR<br>No RBCT (n): NR<br>Hazard ratio 4.4 (95% CI 3.2 to 5.9)  | RBCT (n): NR<br>No RBCT (n): NR<br>Hazard ratio 1.9 (95% CI 1.3 to 2.9)                                                                       | Nature of adjustment: transfusion propensity, baseline characteristics, nadir haemoglobin<br>Type of model used: logistic regression<br>Number covariates in model: 16 |
| Bochicchio 2008 (4)                                                    | Number covariates: 5<br>Age: Yes<br>Sex: Yes<br>Smoking: No<br>Co-morbidity: Yes<br>Hb level: No<br>Unclear if covariates pre-specified or data driven | RBCT and other blood product versus no RBCT or other blood products<br><br>Mortality (time period not specified) | RBCT: 147/786<br>No RBCT: 32/386<br>p<0.001<br>(Odds ratio not reported) | RBCT: 147/786<br>No RBCT: 32/386<br>Odds ratio 1.05 (95% CI 1.03 to 1.07)                                                                     | Nature of adjustment: age, ISS, admission GCS<br>Type of model used: logistic regression<br>Number covariates in model: 3                                              |
| Koch 2006 (11,12)                                                      | Number covariates: multiple<br>Age: yes<br>Sex: yes<br>Smoking: yes<br>Co-morbidity: yes<br>HB level: yes<br>Covariates were pre-specified             | RBCT versus no RBCT<br><br>Mortality in hospital                                                                 | RBCT (n): NR<br>No RBCT (n): NR<br>Odds ratio 1.78 (95% CI 1.70 to 1.87) | RBCT (n): NR<br>No RBCT (n): NR<br>Odds ratio 1.77 (1.67 to 1.87)                                                                             | Nature of adjustment: multiple covariates<br>Type of model used: logistic regression<br>Number covariate in model: multiple covariates                                 |
| Nikolsky 2009 (14)                                                     | Number covariates: 25<br>Age: yes<br>Sex: yes<br>Smoking: yes<br>Co-morbidity: yes<br>HB level: yes<br>Covariates pre-specified                        | RBCT versus no RBCT<br><br>Mortality at 30 days and 1 year#                                                      | Not reported                                                             | Mortality at 30 days<br>RBCT (n): NR<br>No RBCT (n): NR<br>Hazard ratio 4.71(95% CI 1.97 to 11.26)<br><br>Mortality at 1 year<br>RBCT (n): NR | Nature of adjustment: transfusion propensity<br>Type of model used: Cox proportional hazards model<br>Number covariate in model: 19                                    |

1  
2  
3  
4  
5  
6  
7  
8  
9  
10  
11  
12  
13  
14  
15  
16  
17  
18  
19  
20  
21  
22  
23  
24  
25  
26  
27  
28  
29  
30  
31  
32  
33  
34  
35  
36  
37  
38  
39  
40  
41  
42  
43  
44  
45  
46  
47  
48  
49

|                       |                                                                                                                                      |                                                                         |                                                                                                                              |                                                                                                                                                                                                                                                                                         |                                                                                                                                      |
|-----------------------|--------------------------------------------------------------------------------------------------------------------------------------|-------------------------------------------------------------------------|------------------------------------------------------------------------------------------------------------------------------|-----------------------------------------------------------------------------------------------------------------------------------------------------------------------------------------------------------------------------------------------------------------------------------------|--------------------------------------------------------------------------------------------------------------------------------------|
|                       |                                                                                                                                      |                                                                         |                                                                                                                              | No RBCT (n): NR<br>Hazard ratio 3.16 (95% CI 1.66 to 6.03)                                                                                                                                                                                                                              |                                                                                                                                      |
| Surgenor 2009 (20)    | Number covariates: multiple<br>Age: yes<br>Sex: yes<br>Smoking: no<br>Co-morbidity: yes<br>Hb level: yes<br>Covariates pre-specified | RBCT versus no RBCT<br><br>Mortality within 5 years#                    | RBCT (n): NR<br>No RBCT (n): NR<br>Hazard ratio 1.94 (95% CI 1.71 to 2.20)                                                   | RBCT (n): NR<br>No RBCT (n): NR<br>Hazard ratio 1.16 (95% CI 1.01 to 1.33)                                                                                                                                                                                                              | Nature of adjustment: propensity model<br>Type of model used: Cox proportion hazard model<br>Number covariates in model: 13          |
| Taylor 2006 (21)      | Number covariates: 5<br>Age: yes<br>Sex: yes<br>Smoking: no<br>Co-morbidity: yes<br>Hb level: no<br>Covariates pre-specified         | RBCT versus no RBCT<br><br>Mortality (time period not specified)        | RBCT: 98/449<br>No RBCT: 166/1636<br>p<0.001<br>(only p value reported)                                                      | POS ≤ 25%<br>RBCT: 47/147<br>No RBCT: 105/336<br>p=0.88<br><br>POS 25% ≤ 50%<br>RBCT: 17/126<br>No RBCT: 23/358<br>p=0.013<br><br>POS 50% ≤ 75%<br>RBCT: 14/94<br>No RBCT: 100/390<br>P<0.0001<br><br>POS >75%<br>RBCT: 3/39<br>No RBCT: 4/444<br>p=0.14<br><br>(only p value reported) | Nature of adjustment: mortality predication model (POS)<br>Type of model used: logistic regression<br>Number covariates in model: NR |
| Van Straten 2010 (22) | Number covariates: 16<br>Age: yes<br>Sex: yes<br>Smoking: no<br>Co-morbidity: yes<br>Hb level: no<br>Unclear if covariates pre-      | RBCT versus no RBCT<br><br>Mortality ≤ 30 days and mortality > 30 days# | Mortality ≤ 30 days<br>RBCT (n): NR<br>No RBCT (n): NR<br>Hazard ratio 1.31 (95% CI 1.27 to 1.35)<br><br>Mortality > 30 days | Mortality ≤ 30 days<br>RBCT (n): NR<br>No RBCT (n): NR<br>Hazard ratio 1.21 (95% CI 1.13 to 1.30)<br><br>Mortality > 30 days                                                                                                                                                            | Nature of adjustment: unclear<br>Type of model used: Cox proportional hazards model<br>Number covariates in model: NR                |

|                                                                          |                                                                                                                                      |                                                                  |                                                                                                                                                                                                                                                                        |                                                                                                                                                                                                                                                                                |                                                                                                                                                                                                           |
|--------------------------------------------------------------------------|--------------------------------------------------------------------------------------------------------------------------------------|------------------------------------------------------------------|------------------------------------------------------------------------------------------------------------------------------------------------------------------------------------------------------------------------------------------------------------------------|--------------------------------------------------------------------------------------------------------------------------------------------------------------------------------------------------------------------------------------------------------------------------------|-----------------------------------------------------------------------------------------------------------------------------------------------------------------------------------------------------------|
|                                                                          | specified or data driven                                                                                                             |                                                                  | Hazard ratio 1.16 (95% CI 1.13 to 1.20)                                                                                                                                                                                                                                | Hazard ratio 1.04 (95% CI 0.99 to 1.07)                                                                                                                                                                                                                                        |                                                                                                                                                                                                           |
| Vincent 2008 (23)                                                        | Number covariates: 8<br>Age: yes<br>Sex: yes<br>Smoking :no<br>Co-morbidity: yes<br>Hb level: no<br>Covariates pre-specified         | RBCT versus no RBCT<br><br>Mortality at 30 days in hospital#     | RBCT: 311/1040<br>No RBCT: 436/2107<br>p<0.001<br>(only p value reported)                                                                                                                                                                                              | RBCT: NR<br>No RBCT: NR<br>Hazard ratio 0.89 (95% CI 0.76 to 1.05) p=0.16                                                                                                                                                                                                      | Nature of adjustment: multiple covariates<br>Type of model used: Cox proportional hazards model<br>Number covariates in model: 8                                                                          |
| <b>Red blood cells versus no red blood cells – retrospective studies</b> |                                                                                                                                      |                                                                  |                                                                                                                                                                                                                                                                        |                                                                                                                                                                                                                                                                                |                                                                                                                                                                                                           |
| Engoren 2009 (5)                                                         | Number covariates: 25<br>Age: Yes<br>Sex: Yes<br>Smoking: No<br>Co-morbidity: Yes<br>Hb level: Yes<br>Covariates pre-specified       | RBCT versus no RBCT<br><br>Mortality at 30 days and 180 days#    | Mortality 30 days<br>RBCT: 101/404<br>No RBCT: 265/1809<br><br>Mortality 180 days<br>RBCT: 150/404<br>No RBCT: 414/1809<br>p<0.01<br>(Hazard ratios not reported)                                                                                                      | Mortality 30 days<br>RBCT: NR<br>No RBCT: NR<br>Hazard ratio 1.11 (95% CI 0.86 to 1.42)<br><br>Mortality 180 days<br>RBCT: NR<br>No RBCT: NR<br>Hazard ratio 1.14 (95% CI 0.83 to 1.58)                                                                                        | Nature of adjustment: multiple variables<br>Type of model used: Cox proportional hazard modelling<br>Number covariates in model: NR                                                                       |
| Engoren 2009 (6)                                                         | Number covariates: multiple<br>Age: Yes<br>Sex: Yes<br>Smoking: No<br>Co-morbidity: Yes<br>Hb level: Yes<br>Covariates pre-specified | RBCT versus no RBCT<br><br>Mortality within 30 days and >30 days | Mortality within 30 days<br>Value only:<br>RBCT: 26/993<br>No RBCT: 16/993<br>CABG and value:<br>RBCT: 69/830<br>No RBCT: 14/830<br><br>Mortality >30 days<br>Value only:<br>RBCT: 160/993<br>No RBCT: 165/993<br>CABG and value:<br>RBCT: 279/830<br>No RBCT: 113/830 | Mortality within 30 days<br>Value only: Odds ratio 1.95 (95% CI 0.97 to 3.91)<br>CABG and value: Odds ratio 2.23 (95% CI 1.12 to 4.46)<br><br>Mortality >30 days<br>Value only: Risk ratio 1.25 (95% CI 0.97 to 1.61)<br>CABG and value: Risk ratio 1.44 (95% CI 1.13 to 1.84) | Nature of adjustment: propensity score<br>Type of model used: Cox proportional hazard modelling (mortality >30 days) and logistic regression (mortality within 30 days)<br>Number covariates in model: NR |
| Garty 2009                                                               | Number covariates:                                                                                                                   | RBCT (unclear if included)                                       | Mortality in hospital                                                                                                                                                                                                                                                  | Mortality in hospital                                                                                                                                                                                                                                                          | Nature of adjustment: propensity                                                                                                                                                                          |

|                  |                                                                                                                                                           |                                                                                                      |                                                                                                                                                                                                                                                                                          |                                                                                                                                                                                                                                                                                                                                                                                                                                                                 |                                                                                                                                                                               |
|------------------|-----------------------------------------------------------------------------------------------------------------------------------------------------------|------------------------------------------------------------------------------------------------------|------------------------------------------------------------------------------------------------------------------------------------------------------------------------------------------------------------------------------------------------------------------------------------------|-----------------------------------------------------------------------------------------------------------------------------------------------------------------------------------------------------------------------------------------------------------------------------------------------------------------------------------------------------------------------------------------------------------------------------------------------------------------|-------------------------------------------------------------------------------------------------------------------------------------------------------------------------------|
| (7)              | unclear<br>Age: Yes<br>Sex: Yes<br>Smoking: Yes<br>Co-morbidity: Yes<br>Hb level: Yes<br>Unclear if covariates pre-specified or data driven               | other blood product) versus no RBCT<br><br>Mortality in hospital, 30 days, 1 year and 4 years#       | RBCT: 18/166 (10.8%)<br>No RBCT: 113/2169 (5.2%)<br><br>Mortality 30 days<br>RBCT: 18/166 (11%)<br>No RBCT: 183/2169 (8.5%)<br><br>Mortality 1 year<br>RBCT: 65/166 (39.6%)<br>No RBCT: 616/2169 (28.5%)<br><br>Mortality 4 years<br>RBCT: 114/166 (69.5%)<br>No RBCT: 1284/2169 (59.5%) | RBCT: 9/103 (8.7%)<br>No RBCT: 15/103 (14.6%)<br>Hazard ratio: 0.48 (95% CI 0.21 to 1.11)<br><br>Mortality 30 days<br>RBCT: 10/103 (9.7%)<br>No RBCT: 19/103 (18.4%)<br>Hazard ratio: 0.29 (95% CI 0.13 to 0.64)<br><br>Mortality 1 year<br>RBCT: 40/103 (38.8%)<br>No RBCT: 44/103 (42.7%)<br>Hazard ratio: 0.74 (95% CI 0.50 to 1.09)<br><br>Mortality 4 years<br>RBCT: 75/103 (72.8%)<br>No RBCT: 79/103 (76.7%)<br>Hazard ratio: 0.86 (95% CI 0.64 to 1.14) | score<br>Type of model used: Cox proportional hazard modelling (1-4 year mortality) and logistic regression (mortality up to 30 days)<br>Number covariates in model: 9        |
| Jani 2007 (8)    | Number covariates: 31<br>Age: yes<br>Sex: yes<br>Smoking: yes<br>Co-morbidity: yes<br>HB level: yes<br>Unclear if covariates pre-specified or data driven | RBCT and other blood product versus no RBCT<br><br>Mortality in hospital                             | RBCT: 150/1033<br>No RBCT: 108/3590<br>p<0.001<br>(only p value reported)                                                                                                                                                                                                                | RBCT: 76/598<br>No RBCT: 44/598<br>Odds ratio 2.02 (95% CI 1.47 to 2.79)                                                                                                                                                                                                                                                                                                                                                                                        | Nature of adjustment: transfusion propensity and co morbidities<br>Type of model used: logistic regression<br>Number covariate in model: 10                                   |
| Johnson 2006 (9) | Number covariates: 7<br>Age: yes<br>Sex: yes<br>Smoking: no<br>Co-morbidity: no<br>HB level: yes<br>Unclear if covariates pre-specified or data driven    | RBCT (unclear if included other blood product) versus no RBCT<br><br>Mortality at 30, 120, 365 days# | Mortality 30 days<br>RBCT: 95/1068<br>No RBCT: 181/2503<br>p=0.10<br><br>Mortality 120 days<br>RBCT: 247/1068<br>No RBCT: 374/2503<br>p<0.0001<br><br>Mortality 365 days                                                                                                                 | Mortality 30 days (not reported)<br><br>Mortality 120 days (not reported)<br><br>Mortality 365 days                                                                                                                                                                                                                                                                                                                                                             | Nature of adjustment: age, sex, ASA grade, preoperative haemoglobin, residential status, mobility score<br>Type of model used: Cox regression<br>Number covariate in model: 7 |

|                    |                                                                                                                                    |                                                                          |                                                                             |                                                                                                                                                                                                                                                        |                                                                                                                                                                  |
|--------------------|------------------------------------------------------------------------------------------------------------------------------------|--------------------------------------------------------------------------|-----------------------------------------------------------------------------|--------------------------------------------------------------------------------------------------------------------------------------------------------------------------------------------------------------------------------------------------------|------------------------------------------------------------------------------------------------------------------------------------------------------------------|
|                    |                                                                                                                                    |                                                                          | RBCT : 381/1068<br>No RBCT: 626/2503<br>p<0.001<br>(only p values reported) | RBCT: 381/1068<br>No RBCT: 626/2503<br>Hazard ratio 1.11 (95% CI 0.96 to 1.29)                                                                                                                                                                         |                                                                                                                                                                  |
| Khorana 2008 (10)  | Number covariates: Unclear<br>Age: yes<br>Sex: yes<br>Smoking: no<br>Co-morbidity: yes<br>HB level: no<br>Covariates pre-specified | RBCT and other blood product versus no RBCT<br><br>Mortality in hospital | RBCT (n): 11.9%<br>No RBCT (n): NR                                          | RBCT (n): NR<br>No RBCT (n): NR<br>Odds ratio 1.34 (95% 1.29 to 1.38)                                                                                                                                                                                  | Nature of adjustment: NR<br>Type of model used: multivariate logistic regression<br>Number covariate in model: NR                                                |
| Murphy 2007 (13)   | Number covariates: 21<br>Age: yes<br>Sex: yes<br>Smoking: yes<br>Co-morbidity: yes<br>HB level: yes<br>Covariates pre-specified    | RBCT versus no RBCT<br><br>Mortality up to 7 years post surgery#         | Not reported                                                                | Mortality 0 - 30 days<br>RBCT (n): NR<br>No RBCT (n): NR<br>Hazard ratio 6.69( 95% CI 3.66 to 15.1)<br><br>Mortality 31 days to 1 year<br>Hazard ratio 2.59 (95% CI 1.68 to 4.18)<br><br>Mortality > 1 year<br>Hazard ratio 1.32 (95% CI 1.08 to 1.64) | Nature of adjustment: transfusion propensity<br>Type of model used: logistic regression and Cox proportional hazards regression<br>Number covariate in model: NR |
| Pederson 2009 (15) | Number covariates: 69<br>Age: yes<br>Sex: yes<br>Smoking: no<br>Co-morbidity: yes<br>HB level: yes<br>Covariates pre-specified     | RBCT versus no RBCT<br><br>Mortality at 90 day                           | RBCT (n): NR<br>No RBCT (n): NR<br>Odds ratio 2.17 (95% CI 1.24 to 3.79)    | RBCT: 39/2254<br>No RBCT: 18/2254<br>Odds ratio 2.17 (95% CI 1.24 to 3.80)                                                                                                                                                                             | Nature of adjustment: transfusion propensity<br>Type of model used: multivariate logistic regression<br>Number covariate in model: NR                            |
| Rogers 2006 (16)   | Number covariates: 33<br>Age: yes<br>Sex: yes<br>Smoking: no<br>Co-morbidity: yes<br>HB level: unclear                             | RBCT versus no RBCT<br><br>Mortality within 100 days                     | RBCT: 648/6893<br>No RBCT: 44/2325<br>Odds ratio 6.6 (95% CI 4.4 to 9.9)    | RBCT: 648/6893<br>No RBCT: 44/2325<br>Odds ratio 5.6 (95% CI 3.7 to 8.6)                                                                                                                                                                               | Nature of adjustment: sex, age, race, co morbidity, urgency of admission<br>Type of model used: generalised linear regression<br>Number covariate in model: 5    |

|                       |                                                                                                                                                         |                                                                                            |                                                                            |                                                                                                                                                                                                                                                                                                                                           |                                                                                                                                                                               |
|-----------------------|---------------------------------------------------------------------------------------------------------------------------------------------------------|--------------------------------------------------------------------------------------------|----------------------------------------------------------------------------|-------------------------------------------------------------------------------------------------------------------------------------------------------------------------------------------------------------------------------------------------------------------------------------------------------------------------------------------|-------------------------------------------------------------------------------------------------------------------------------------------------------------------------------|
|                       | Unclear if covariates pre-specified or data driven                                                                                                      |                                                                                            |                                                                            |                                                                                                                                                                                                                                                                                                                                           |                                                                                                                                                                               |
| Rogers 2009 (17)      | Number covariates: 13<br>Age: yes<br>Sex: yes<br>Smoking: no<br>Co-morbidity: yes<br>HB level: no<br>Unclear if covariates pre-specified or data driven | RBCT and other blood product versus no RBCT<br><br>Mortality in hospital and at 30 days    | Not reported                                                               | Mortality in hospital<br>RBCT (n): NR<br>No RBCT (n): NR<br>Elective surgery: Odds ratio 4.67 (95% CI 2.38 to 9.18)<br>Urgent surgery: Odds ratio 1.82 (95% CI 1.51 to 2.20)<br><br>Mortality 30 days post discharge<br>Elective surgery: Odds ratio 2.88 (95% CI 1.38 to 5.98)<br>Urgent surgery: Odds ratio 4.65 (95% CI 1.90 to 11.39) | Nature of adjustment: propensity score, surgical volume, hospital volume<br>Type of model used: multivariate mixed effect logistic regression<br>Number covariate in model: 3 |
| Salehiomran 2009 (18) | Number covariates: 31<br>Age: yes<br>Sex: yes<br>Smoking: yes<br>Co-morbidity: yes<br>HB level: yes<br>Covariates pre-specified                         | RBCT (unclear if included other blood products) versus no RBCT<br><br>Mortality at 30 days | RBCT: 60/2333<br>No RBCT: 42/11773<br>p<0.001<br>(Odds ratio not reported) | RBCT: 60/2333<br>No RBCT: 42/11773<br>Odds ratio 3.98 (95% CI 2.44 to 6.47)                                                                                                                                                                                                                                                               | Nature of adjustment: not reported<br>Type of model used: multivariate logistic regression<br>Number covariate in model: 13                                                   |
| Stone 2008 (19)       | Number covariates: 7<br>Age: yes<br>Sex: yes<br>Smoking: N/A<br>Co-morbidity: yes<br>Hb level: no<br>Unclear if covariates pre-specified or data driven | RBCT versus no RBCT<br><br>Mortality in hospital                                           | RBCT: 31/106<br>No RBCT: 42/1533<br>Odds ratio 14.67 (95% CI not reported) | Not reported (authors said statistical model was to unreliable to provide reliable conclusions)                                                                                                                                                                                                                                           | Nature of adjustment: injury severity<br>Type of model used: logistic regression<br>Number covariate in model: NR                                                             |
| Weinberg 2008 (24)    | Number covariates: 9<br>Age: yes<br>Sex: yes<br>Smoking: no<br>Co-morbidity: no<br>Hb level: no<br>Unclear if covariates pre-specified or data driven   | RBCT versus no RBCT<br><br>Mortality in hospital                                           | RBCT (n): 4.2%<br>No RBCT (n): 2.3%<br>p=0.04                              | RBCT (n): NR<br>No RBCT (n): NR<br>Odds ratio 0.96 (95% CI 0.48 to 1.94)                                                                                                                                                                                                                                                                  | Nature of adjustment: age, gender, ISS, injury, ventilation, transfusion volume<br>Type of model used: logistic regression<br>Number of covariates in model: 5                |



|                                                                     |                                                                                                                                                                 |                                                                           |                                                                                                                                                                                                   |                                                                                                                                                                                                                                              |                                                                                                                                                                                     |
|---------------------------------------------------------------------|-----------------------------------------------------------------------------------------------------------------------------------------------------------------|---------------------------------------------------------------------------|---------------------------------------------------------------------------------------------------------------------------------------------------------------------------------------------------|----------------------------------------------------------------------------------------------------------------------------------------------------------------------------------------------------------------------------------------------|-------------------------------------------------------------------------------------------------------------------------------------------------------------------------------------|
| Wu 2010 (25)                                                        | Number covariates: multiple<br>Age: yes<br>Sex: yes<br>Smoking: yes<br>Co-morbidity: yes<br>Hb level: yes<br>Unclear if covariates pre-specified or data driven | RBCT versus no RBCT<br><br>Mortality at 30 days                           | Not reported                                                                                                                                                                                      | RBCT (n): NR<br>No RBCT (n): NR<br>Odds ratio 1.37 (95% CI 1.27 to 1.48)                                                                                                                                                                     | Nature of adjustment: mean operative time, ASA classification, rate of general anaesthesia<br>Type of model used: logistic regression<br>Number covariates in model: NR             |
| Zilberberg 2008 (26)                                                | Number covariates: multiple<br>Age: yes<br>Sex: yes<br>Smoking: no<br>Co-morbidity: yes<br>Hb level: yes<br>Covariates pre-specified                            | RBCT versus no RBCT<br><br>Mortality in hospital                          | RBCT: 938/2912<br>No RBCT: 342/1432<br>Odds ratio 1.51 (95% CI 1.31 to 1.75)                                                                                                                      | RBCT : 938/2912<br>No RBCT: 342/1432<br>Odds ratio 1.21 (95% CI 1.00 to 1.48)                                                                                                                                                                | Nature of adjustment: multiple variables<br>Type of model used: logistic regression<br>Number covariates in model: 13                                                               |
| <b>Volume 'A' red blood cells versus volume 'B' red blood cells</b> |                                                                                                                                                                 |                                                                           |                                                                                                                                                                                                   |                                                                                                                                                                                                                                              |                                                                                                                                                                                     |
| Bernard 2009 (27)                                                   | Number covariates: multiple<br>Age: Yes<br>Sex: Yes<br>Smoking: Yes<br>Co-morbidity: Yes<br>Hb level: Yes<br>Covariates pre-specified                           | Volume of RBCT versus another volume of RBCT<br><br>Mortality at 30 days  | Intra operative<br>1 unit: 136/1343<br>2 units: 194/1903<br>3-4 units: 151/977<br>5-9 units: 67/412<br>>10 units: 45/153<br><br>Post operative<br>>4 units: 153/575<br>(Odds ratios not reported) | Intra operative<br>1 unit: Odds ratio 1.32<br>2 units: Odds ratio 1.38<br>3-4 units: Odds ratio 1.97<br>5-9 units: Odds ratio 2.17<br>>10 units: Odds ratio 9.83<br><br>Post operative<br>>4 units: Odds ratio 2.65<br>(95% CI not reported) | Nature of adjustment: transfusion propensity, type of procedure, wound class, operative duration<br>Type of model used: logistic regression<br>Number covariates in model: multiple |
| Charles 2007 (28)                                                   | Number covariates: 7<br>Age: Yes<br>Sex: Yes<br>Smoking: No<br>Co-morbidity: Yes<br>Hb level: No<br>Covariates pre-specified                                    | Volume of RBCT versus another volume of RBCT<br><br>Mortality at 24 hours | 0 RBCT: 1.8%<br>1-2 units: 6.5%<br>3-5 units: 16.1%<br>≥6 units: 29.8%<br>(Odds ratios not reported)                                                                                              | 1-2 units: p=0.18<br>3-5 units: Odds ratio 3.22 p=0.002<br>≥6 units: Odds ratio 4.87 p=0.000<br>(95% CI not reported)                                                                                                                        | Nature of adjustment: age, gender, ISS score, SI<br>Type of model used: logistic regression<br>Number covariates in model: 4                                                        |

|                                                              |                                                                                                                                     |                                                                                                                                                |                                                                                |                                                                                                                                                                                                                                                                                                                                                                                                                                        |                                                                                                                                                                                                                      |
|--------------------------------------------------------------|-------------------------------------------------------------------------------------------------------------------------------------|------------------------------------------------------------------------------------------------------------------------------------------------|--------------------------------------------------------------------------------|----------------------------------------------------------------------------------------------------------------------------------------------------------------------------------------------------------------------------------------------------------------------------------------------------------------------------------------------------------------------------------------------------------------------------------------|----------------------------------------------------------------------------------------------------------------------------------------------------------------------------------------------------------------------|
| O'Keeffe 2010 (29)                                           | Number covariates: 23<br>Age: yes<br>Sex: yes<br>Smoking: unclear<br>Co-morbidity: yes<br>HB level: yes<br>Covariates pre-specified | Volume of RBCT versus another volume of RBCT<br><br>Mortality at 30 days                                                                       | Not reported                                                                   | 1-2 units: Odds ratio 1.92 (95% CI 1.36 to 2.70)<br>>3 units: Odds ratio 2.48 (95% CI 1.55 to 3.98)                                                                                                                                                                                                                                                                                                                                    | Nature of adjustment: transfusion propensity<br>Type of model used: logistic regression<br>Number covariate in model: 19                                                                                             |
| Ruttinger 2007 (30)                                          | Number covariates: 14<br>Age: yes<br>Sex: yes<br>Smoking: no<br>Co-morbidity: yes<br>HB level: yes<br>Covariates pre-specified      | Volume of RBCT versus another volume of RBCT<br><br>Mortality in hospital                                                                      | % reported in figure only (Odds ratios not reported)                           | 1-2 units: Odds ratio 0.68 (95% CI 0.35 to 1.28)<br>3-4 units: Odds ratio 1.11 (95% CI 0.52 to 2.39)<br>5-8 units: Odds ratio 1.16 (95% CI 0.60 to 2.26)<br>8 units: Odds ratio 0.74 (95% CI 0.36 to 1.51)                                                                                                                                                                                                                             | Nature of adjustment: extended analysis<br>Type of model used: logistic regression<br>Number covariate in model: NR                                                                                                  |
| Weightman 2009 (31)                                          | Number covariates: 16<br>Age: yes<br>Sex: yes<br>Smoking: no<br>Co-morbidity: yes<br>Hb level: yes<br>Covariates pre-specified      | Volume of RBCT and other blood product (classified as: 0 units, 1-2 units, 3-6 units and > 6units)<br><br>Mortality (mean follow up 8.1 years) | 0 units: 80/779<br>1-2 units: 56/402<br>3-6 units: 58/333<br>> 6 units: 72/327 | 1-2 units: Hazard ratio 1.00 (95% CI 0.70 to 1.44)<br>3-6 units: Hazard ratio 0.98 (95% CI 0.67 to 1.41)<br>> 6 units: Hazard ratio 1.25 (95% CI 0.87 to 1.79)                                                                                                                                                                                                                                                                         | Nature of adjustment: multiple measures<br>Type of model used: Cox proportional hazard model<br>Number covariates in model: 12                                                                                       |
| <b>'Older red blood cells versus 'newer' red blood cells</b> |                                                                                                                                     |                                                                                                                                                |                                                                                |                                                                                                                                                                                                                                                                                                                                                                                                                                        |                                                                                                                                                                                                                      |
| Edgren 2010 (32)                                             | Number covariates: unclear<br>Age: Yes<br>Sex: Yes<br>Smoking: No<br>Co-morbidity: Yes<br>Hb level: No<br>Covariates pre-specified  | RBCT storage for 0- days, 10-19 days, 20-29 and 30-42 days<br><br>Mortality ≤ 7 days and mortality 8 to 730 days#                              | Not reported                                                                   | Mortality 1 to 7 days<br>Stored 0- 9 days: Hazard ratio 0.96 (95% CI 0.91 to 1.00)<br>Stored 10-19 days: Hazard ratio 1.00 (95% CI not reported)<br>Stored 20-29 days: Hazard ratio 1.06 (95% CI 0.96 to 1.06)<br>Stored 30-42 days: Hazard ratio 1.05 (95% CI 0.97 to 1.12)<br><br>Mortality 8 to 730 days<br>Stored 0- 9 days: Hazard ratio 1.01 (95% CI 0.99 to 1.02)<br>Stored 10-19 days: Hazard ratio 1.00 (95% CI not reported) | Nature of adjustment: number transfusions, age, sex, blood group, calendar period, season, weekday, hospital, indication<br>Type of model used: Cox proportional hazards regression<br>Number covariates in model: 9 |

|                           |                                                                                                                                       |                                                                                                       |                                                                                                                                                |                                                                                                                                                                                                                                                           |                                                                                                                                                                                                  |
|---------------------------|---------------------------------------------------------------------------------------------------------------------------------------|-------------------------------------------------------------------------------------------------------|------------------------------------------------------------------------------------------------------------------------------------------------|-----------------------------------------------------------------------------------------------------------------------------------------------------------------------------------------------------------------------------------------------------------|--------------------------------------------------------------------------------------------------------------------------------------------------------------------------------------------------|
|                           |                                                                                                                                       |                                                                                                       |                                                                                                                                                | Stored 20-29 days: Hazard ratio 0.99 (95% CI 0.97 to 1.01)<br>Stored 30-42 days: Hazard ratio 1.05 (95% CI 1.02 to 1.08)                                                                                                                                  |                                                                                                                                                                                                  |
| Koch 2008 (33)            | Number covariates: multiple<br>Age: yes<br>Sex: yes<br>Smoking: yes<br>Co-morbidity: yes<br>Hb level: yes<br>Covariates pre-specified | RBCT stored for ≤ 14 days versus RBCT stored for > 14 days<br><br>Mortality in hospital and at 1 year | Mortality in hospital<br>Stored ≤ 14 days: 49/2872<br>Stored > 14 days: 88/3130<br>p=0.004<br>(only p value reported)                          | Mortality at 1 year<br>Stored ≤ 14 days: 7.4%<br>Stored > 14 days: 11%<br>p<0.001<br>(only p value reported)                                                                                                                                              | Nature of adjustment: transfusion propensity<br>Type of model used: logistic regression<br>Number covariate in model: NR                                                                         |
| Van de Watering 2006 (34) | Number covariates: 7<br>Age: yes<br>Sex: yes<br>Smoking: no<br>Co-morbidity: yes<br>Hb level: yes<br>Covariates pre-specified         | RBCT stored for <18 days versus RBCT stored for >18 days<br><br>Mortality at 30 days#                 | Stored <18 days (n): NR<br>Hazard ratio 1.33 (95% CI 1.04 to 1.68)<br><br>Stored > 18 days (n): NR<br>Hazard ratio: 0.85 (95% CI 0.69 to 1.05) | Stored <18 days (n): NR<br>Hazard ratio 0.93 (95% CI 0.71 to 1.23)<br><br>Stored > 18 days (n): NR<br>Hazard ratio 0.98 (95% CI 0.76 to 1.25)                                                                                                             | Nature of adjustment: number of transfusions, duration of surgery, previous CABG, number of distal anatomises, age, sex, Hb level<br>Type of model used: NR<br>Number covariates in model: 7     |
| Weinberg 2008 (35)        | Number covariates: 6<br>Age: yes<br>Sex: yes<br>Smoking: no<br>Co-morbidity: no<br>Hb level: no<br>Covariates pre-specified           | RBCT stored for <14 days versus RBCT stored for >14 days<br><br>Mortality (time period not specified) | Not reported                                                                                                                                   | Stored <14 days:<br>1-2 units: Odds ratio 1.65 (95% CI 1.01 to 2.70)<br>≥ 3 units: Odds ratio 1.70 (95% CI 0.96 to 2.99)<br><br>Stored ≥ 14 days:<br>1-2 units: Odds ratio 1.78 (95% CI 1.06 to 2.98)<br>≥ 3 units: Odds ratio 2.78 (95% CI 1.58 to 4.88) | Nature of adjustment: age, gender, ISS, type injury, number units transfused first 24 hours, length of hospital stay<br>Type of model used: logistic regression<br>Number covariates in model: 6 |

RBCT=red blood cell transfusion; NR: not reported; OR = odds ratio; RR = risk ratio; HR = hazard ratio; #time-to-event outcome

1  
2  
3  
4  
5  
6  
7  
8  
9  
10  
11  
12  
13  
14  
15  
16  
17  
18  
19  
20  
21  
22  
23  
24  
25  
26  
27  
28  
29  
30  
31  
32  
33  
34  
35  
36  
37  
38  
39  
40  
41  
42  
43  
44  
45  
46  
47  
48  
49

**APPENDIX 4: Summary of unadjusted and adjusted results of the included studies**

| Study ID                                                               | Disease area    | Comparison                                  | Mortality                 | Unadjusted results                                                                                               | Adjusted result                                                                                                   |
|------------------------------------------------------------------------|-----------------|---------------------------------------------|---------------------------|------------------------------------------------------------------------------------------------------------------|-------------------------------------------------------------------------------------------------------------------|
| <b>Red blood cells versus no red blood cells – prospective studies</b> |                 |                                             |                           |                                                                                                                  |                                                                                                                   |
| Aronson 2008 (3)                                                       | Cardiac surgery | RBCT versus no RBCT                         | 6 months                  | HR 4.4 (95% CI 3.2 to 5.9)                                                                                       | HR 1.9 (95% CI 1.3 to 2.9)                                                                                        |
| Bochicchio 2008 (4)                                                    | Trauma          | RBCT and other blood product versus no RBCT | Time period not specified | OR 2.54 (95% CI 1.70 to 3.81)*                                                                                   | OR 1.05 (95% CI 1.03 to 1.07)                                                                                     |
| Koch 2006 (11,12)                                                      | Cardiac surgery | RBCT versus no RBCT                         | In hospital               | OR 1.78 (95% CI 1.70 to 1.87)                                                                                    | OR 1.77 (1.67 to 1.87)                                                                                            |
| Nikolsky 2009 (14)                                                     | Cardiac surgery | RBCT versus no RBCT                         | 30 days and 1 year        | Not reported                                                                                                     | Mortality at 30 days<br>HR 4.71(95% CI 1.97 to 11.26)<br><br>Mortality at 1 year<br>HR 3.16 (95% CI 1.66 to 6.03) |
| Surgenor 2009 (20)                                                     | Cardiac surgery | RBCT versus no RBCT                         | ≤ 5 years                 | HR 1.94 (95% CI 1.71 to 2.20)                                                                                    | HR 1.16 (95% CI 1.01 to 1.33)                                                                                     |
| Taylor 2006 (21)                                                       | Intensive care  | RBCT versus no RBCT                         | Time period not specified | OR 2.47 (95% CI 1.88 to 3.26)*                                                                                   | POS ≤ 25% p=0.88<br>POS 25% ≤ 50% p=0.013<br>POS 50% ≤ 75% p<0.0001<br>POS >75% p=0.14                            |
| Van Straten 2010 (22)                                                  | Cardiac surgery | RBCT versus no RBCT                         | ≤ 30 days and > 30 days   | Mortality ≤ 30 days<br>HR 1.31 (95% CI 1.27 to 1.35)<br><br>Mortality > 30 days<br>HR 1.16 (95% CI 1.13 to 1.20) | Mortality ≤ 30 days<br>HR 1.21 (95% CI 1.13 to 1.30)<br><br>Mortality > 30 days<br>HR 1.04 (95% CI 0.99 to 1.07)  |
| Vincent 2008 (23)                                                      | Intensive care  | RBCT versus no RBCT                         | 30 days in hospital       | OR 1.64 (95% CI 1.38 to 1.94)*                                                                                   | HR 0.89 (95% CI 0.76 to 1.05)                                                                                     |

| Red blood cells versus no red blood cells – retrospective studies |                              |                                                      |                                          |                                                                                                                                                                                                                                                          |                                                                                                                                                                                                                                                      |
|-------------------------------------------------------------------|------------------------------|------------------------------------------------------|------------------------------------------|----------------------------------------------------------------------------------------------------------------------------------------------------------------------------------------------------------------------------------------------------------|------------------------------------------------------------------------------------------------------------------------------------------------------------------------------------------------------------------------------------------------------|
| Engoren 2009 (5)                                                  | Intensive care               | RBCT versus no RBCT                                  | 30 and 180 days                          | Mortality 30 days<br>OR 1.94 (95% CI 1.50 to 2.52)*<br><br>Mortality 180 days<br>OR 1.99 (95% CI 1.58 to 2.50)*                                                                                                                                          | Mortality 30 days<br>HR 1.11 (95% CI 0.86 to 1.42)<br><br>Mortality 180 days<br>HR 1.14 (95% CI 0.83 to 1.58)                                                                                                                                        |
| Engoren 2009 (6)                                                  | Cardiac surgery              | RBCT versus no RBCT                                  | ≤ 30 days and >30 days                   | Mortality ≤30 days<br>Valve only:<br>OR 1.65 (95% CI 0.88 to 3.08)*<br>CABG and valve:<br>OR 5.28 (95% CI 2.95 to 9.47)*<br><br>Mortality >30 days<br>Valve only:<br>RR 0.97 (95% CI 0.79 to 1.18)*<br>CABG and valve:<br>RR 2.47 (95% CI 2.03 to 3.00)* | Mortality ≤30 days<br>Valve only:<br>OR 1.95 (95% CI 0.97 to 3.91)<br>CABG and valve:<br>OR 2.23 (95% CI 1.12 to 4.46)<br><br>Mortality >30 days<br>Valve only:<br>RR 1.25 (95% CI 0.97 to 1.61)<br>CABG and valve:<br>RR 1.44 (95% CI 1.13 to 1.84) |
| Garty 2009 (7)                                                    | Cardiac surgery              | RBCT (unclear if other blood product) versus no RBCT | In hospital, 30 days, 1 year and 4 years | Mortality in hospital<br>OR 0.77 (95% CI 0.46 to 1.31)*<br><br>Mortality 30 days<br>OR 2.21 (95% CI 1.31 to 3.74)*<br><br>Mortality 1 year<br>OR 1.62 (95% CI 1.17 to 2.25)*<br><br>Mortality 4 years<br>OR 1.51 (95% CI 1.08 to 2.12)*                  | Mortality in hospital<br>HR 0.48 (95% CI 0.21 to 1.11)<br><br>Mortality 30 days<br>HR 0.29 (95% CI 0.13 to 0.64)<br><br>Mortality 1 year<br>HR 0.74 (95% CI 0.50 to 1.09)<br><br>Mortality 4 years<br>HR 0.86 (95% CI 0.64 to 1.14)                  |
| Jani 2007 (8)                                                     | Cardiac surgery              | RBCT and other blood product versus no RBCT          | In hospital                              | OR 5.48 (95% CI 4.23 to 7.09)*                                                                                                                                                                                                                           | OR 2.02 (95% CI 1.47 to 2.79)                                                                                                                                                                                                                        |
| Johnson 2006 (9)                                                  | Hip fracture and replacement | RBCT (unclear if other blood product) versus no RBCT | 30 days, 120 days, 365 days              | Mortality 30 days<br>OR 1.84 (95% CI 1.42 to 2.38)*<br><br>Mortality 120 days<br>OR 1.71 (95% CI 1.43 to 2.05)*                                                                                                                                          | Mortality 365 days<br>HR 1.11 (95% CI 0.96 to 1.29)                                                                                                                                                                                                  |

|                       |                              |                                                      |                         |                                                      |                                                                                                                                                                                                                                                                                    |
|-----------------------|------------------------------|------------------------------------------------------|-------------------------|------------------------------------------------------|------------------------------------------------------------------------------------------------------------------------------------------------------------------------------------------------------------------------------------------------------------------------------------|
|                       |                              |                                                      |                         | Mortality 365 days<br>OR 1.66 (95% CI 1.42 to 1.94)* |                                                                                                                                                                                                                                                                                    |
| Khorana 2008 (10)     | Oncology                     | RBCT and other blood product versus no RBCT          | In hospital             | Not reported                                         | OR 1.34 (95% 1.29 to 1.38)                                                                                                                                                                                                                                                         |
| Murphy 2007 (13)      | Cardiac surgery              | RBCT versus no RBCT                                  | ≤7 years                | Not reported                                         | Mortality 0 - 30 days<br>HR 6.69 (95% CI 3.66 to 15.1)<br><br>Mortality 31 days to 1 year<br>HR 2.59 (95% CI 1.68 to 4.18)<br><br>Mortality > 1 year<br>HR 1.32 (95% CI 1.08 to 1.64)                                                                                              |
| Pederson 2009 (15)    | Hip fracture and replacement | RBCT versus no RBCT                                  | 90 day                  | OR 2.17 (95% CI 1.24 to 3.79)                        | OR 2.17 (95% CI 1.24 to 3.80)                                                                                                                                                                                                                                                      |
| Rogers 2006 (16)      | Cardiac surgery              | RBCT versus no RBCT                                  | ≤100 days               | OR 6.6 (95% CI 4.4 to 9.9)                           | OR 5.6 (95% CI 3.7 to 8.6)                                                                                                                                                                                                                                                         |
| Rogers 2009 (17)      | Cardiac surgery              | RBCT and other blood product versus no RBCT          | In hospital and 30 days | Not reported                                         | Mortality in hospital<br>Elective surgery:<br>OR 4.67 (95% CI 2.38 to 9.18)<br>Urgent surgery:<br>OR 1.82 (95% CI 1.51 to 2.20)<br><br>Mortality 30 days post discharge<br>Elective surgery:<br>OR 2.88 (95% CI 1.38 to 5.98)<br>Urgent surgery:<br>OR 4.65 (95% CI 1.90 to 11.39) |
| Salehiomran 2009 (18) | Cardiac surgery              | RBCT (unclear if other blood product) versus no RBCT | 30 days                 | OR 1.55 (95% CI 1.04 to 2.30)*                       | OR 3.98 (95% CI 2.44 to 6.47)                                                                                                                                                                                                                                                      |
| Stone 2008 (19)       | Paediatric trauma            | RBCT versus no RBCT                                  | In hospital             | OR 14.67 (95% CI not reported)                       | Not reported                                                                                                                                                                                                                                                                       |
| Weinberg 2008 (24)    | Adult trauma                 | RBCT versus no RBCT                                  | In hospital             | OR 1.89 (95% CI 0.97 to 3.60)*                       | OR 0.96 (95% CI 0.48 to 1.94)                                                                                                                                                                                                                                                      |
| Wu 2010 (25)          | Intensive care               | RBCT versus no RBCT                                  | 30 days                 | Not reported                                         | OR 1.37 (95% CI 1.27 to 1.48)                                                                                                                                                                                                                                                      |

|                                                                     |                 |                                           |                         |                               |                                                                                                                                                                                                                                                                                                                       |
|---------------------------------------------------------------------|-----------------|-------------------------------------------|-------------------------|-------------------------------|-----------------------------------------------------------------------------------------------------------------------------------------------------------------------------------------------------------------------------------------------------------------------------------------------------------------------|
| Zilberberg 2008 (26)                                                | Intensive care  | RBCT versus no RBCT                       | In hospital             | OR 1.51 (95% CI 1.31 to 1.75) | OR 1.21 (95% CI 1.00 to 1.48)                                                                                                                                                                                                                                                                                         |
| <b>Volume 'A' red blood cells versus volume 'B' red blood cells</b> |                 |                                           |                         |                               |                                                                                                                                                                                                                                                                                                                       |
| Bernard 2009 (27)                                                   | Surgery         | Volume RBCT versus another volume RBCT    | 30 days                 | Not reported                  | Intra operative<br>1 unit:<br>OR 1.32(95% CI not reported)<br>2 units:<br>OR 1.38(95% CI not reported)<br>3-4 units:<br>OR 1.97(95% CI not reported)<br>5-10 units:<br>OR 2.17(95% CI not reported)<br>>10 units:<br>OR 9.83(95% CI not reported)<br><br>Post operative<br>>4 units:<br>OR 2.65 (95% CI not reported) |
| Charles 2007 (28)                                                   | Trauma          | Volume RBCT versus another volume RBCT    | 24 hours                | Not reported                  | 3-5 units:<br>OR 3.22 (95% CI not reported)<br>≥6 units:<br>OR 4.87 (95% CI not reported)                                                                                                                                                                                                                             |
| O'Keeffe 2010 (29)                                                  | Cardiac surgery | Volume RBCT versus another volume RBCT    | 30 days                 | Not reported                  | 1-2 units:<br>OR 1.92 (95% CI 1.36 to 2.70)<br>>3 units:<br>OR 2.48 (95% CI 1.55 to 3.98)                                                                                                                                                                                                                             |
| Ruttinger 2007 (30)                                                 | Intensive care  | Volume RBCT versus another volume of RBCT | In hospital             | Not reported                  | 1-2 units:<br>OR 0.68 (95% CI 0.35 to 1.28)<br>3-4 units:<br>OR 1.11 (95% CI 0.52 to 2.39)<br>5-8 units:<br>OR 1.16 (95% CI 0.60 to 2.26)<br>8 units:<br>OR 0.74 (95% CI 0.36 to 1.51)                                                                                                                                |
| Weightman                                                           | Cardiac surgery | Volume RBCT and other blood               | Mean 8.1 year follow up | Not reported                  | 1-2 units:                                                                                                                                                                                                                                                                                                            |

|                                                              |                 |                                                            |                            |                                                                                                           |                                                                                                                                                                                                                                                                                                                                                                                                                                                                                                            |
|--------------------------------------------------------------|-----------------|------------------------------------------------------------|----------------------------|-----------------------------------------------------------------------------------------------------------|------------------------------------------------------------------------------------------------------------------------------------------------------------------------------------------------------------------------------------------------------------------------------------------------------------------------------------------------------------------------------------------------------------------------------------------------------------------------------------------------------------|
| 2009 (31)                                                    |                 | product versus another volume RBCT                         |                            |                                                                                                           | HR 1.00 (95% CI 0.70 to 1.44)<br>3-6 units:<br>HR 0.98 (95% CI 0.67 to 1.41)<br>> 6 units:<br>HR 1.25 (95% CI 0.87 to 1.79)                                                                                                                                                                                                                                                                                                                                                                                |
| <b>'Older red blood cells versus 'newer' red blood cells</b> |                 |                                                            |                            |                                                                                                           |                                                                                                                                                                                                                                                                                                                                                                                                                                                                                                            |
| Edgren 2010 (32)                                             | Not specified   | RBCT stored for 0- days, 10-19 days, 20-29 and 30-42 days  | ≤ 7 days and 8 to 730 days | Not reported                                                                                              | Mortality 1 to 7 days<br>Stored 0- 9 days:<br>HR 0.96 (95% CI 0.91 to 1.00)<br>Stored 10-19 days:<br>HR 1.00 (95% CI not reported)<br>Stored 20-29 days:<br>HR 1.06 (95% CI 0.96 to 1.06)<br>Stored 30-42 days:<br>HR 1.05 (95% CI 0.97 to 1.12)<br><br>Mortality 8 to 730 days<br>Stored 0- 9 days:<br>HR 1.01 (95% CI 0.99 to 1.02)<br>Stored 10-19 days:<br>HR 1.00 (95% CI not reported)<br>Stored 20-29 days:<br>HR 0.99 (95% CI 0.97 to 1.01)<br>Stored 30-42 days:<br>HR 1.05 (95% CI 1.02 to 1.08) |
| Koch 2008 (33)                                               | Cardiac surgery | RBCT stored for ≤ 14 days versus RBCT stored for > 14 days | In hospital and 1 year     | Mortality in hospital<br>OR 0.60 (95% CI 0.42 to 0.85)*                                                   | Mortality at 1 year<br>p<0.001                                                                                                                                                                                                                                                                                                                                                                                                                                                                             |
| Van de Watering 2006 (34)                                    | Cardiac surgery | RBCT stored for <18 days versus RBCT stored for >18 days   | 30 days                    | Stored <18 days<br>HR 1.33 (95% CI 1.04 to 1.68)<br><br>Stored > 18 days<br>HR 0.85 (95% CI 0.69 to 1.05) | Stored <18 days<br>HR 0.93 (95% CI 0.71 to 1.23)<br><br>Stored > 18 days<br>HR 0.98 (95% CI 0.76 to 1.25)                                                                                                                                                                                                                                                                                                                                                                                                  |
| Weinberg 2008 (35)                                           | Trauma          | RBCT stored for <14 days versus RBCT stored for >14 days   | Time period not specified  | Not reported                                                                                              | Stored <14 days<br>1-2 units:<br>OR 1.65 (95% CI 1.01 to 2.70)                                                                                                                                                                                                                                                                                                                                                                                                                                             |



1  
2  
3  
4  
5  
6  
7  
8  
9  
10  
11  
12  
13  
14  
15  
16  
17  
18  
19  
20  
21  
22  
23  
24  
25  
26  
27  
28  
29  
30  
31  
32  
33  
34  
35  
36  
37  
38  
39  
40  
41  
42  
43  
44  
45  
46  
47  
48  
49

|  |  |  |  |  |                                                                 |
|--|--|--|--|--|-----------------------------------------------------------------|
|  |  |  |  |  | ≥ 3 units:<br>OR 1.70 (95% CI 0.96 to 2.99)                     |
|  |  |  |  |  | Stored ≥ 14 days<br>1-2 units:<br>OR 1.78 (95% CI 1.06 to 2.98) |
|  |  |  |  |  | ≥ 3 units:<br>OR 2.78 (95% CI 1.58 to 4.88)                     |

RBCT=red blood cell transfusion; \*calculated from raw data; OR = odds ratio; RR = risk ratio; HR = hazard ratio

For peer review only

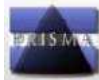

# PRISMA 2009 Checklist

| Section/topic                      | #  | Checklist item                                                                                                                                                                                                                                                                                              | Reported on page # |
|------------------------------------|----|-------------------------------------------------------------------------------------------------------------------------------------------------------------------------------------------------------------------------------------------------------------------------------------------------------------|--------------------|
| <b>TITLE</b>                       |    |                                                                                                                                                                                                                                                                                                             |                    |
| Title                              | 1  | Identify the report as a systematic review, meta-analysis, or both.                                                                                                                                                                                                                                         | 1                  |
| <b>ABSTRACT</b>                    |    |                                                                                                                                                                                                                                                                                                             |                    |
| Structured summary                 | 2  | Provide a structured summary including, as applicable: background; objectives; data sources; study eligibility criteria, participants, and interventions; study appraisal and synthesis methods; results; limitations; conclusions and implications of key findings; systematic review registration number. | 2                  |
| <b>INTRODUCTION</b>                |    |                                                                                                                                                                                                                                                                                                             |                    |
| Rationale                          | 3  | Describe the rationale for the review in the context of what is already known.                                                                                                                                                                                                                              | 4                  |
| Objectives                         | 4  | Provide an explicit statement of questions being addressed with reference to participants, interventions, comparisons, outcomes, and study design (PICOS).                                                                                                                                                  | 5                  |
| <b>METHODS</b>                     |    |                                                                                                                                                                                                                                                                                                             |                    |
| Protocol and registration          | 5  | Indicate if a review protocol exists, if and where it can be accessed (e.g., Web address), and, if available, provide registration information including registration number.                                                                                                                               | N/A                |
| Eligibility criteria               | 6  | Specify study characteristics (e.g., PICOS, length of follow-up) and report characteristics (e.g., years considered, language, publication status) used as criteria for eligibility, giving rationale.                                                                                                      | 5                  |
| Information sources                | 7  | Describe all information sources (e.g., databases with dates of coverage, contact with study authors to identify additional studies) in the search and date last searched.                                                                                                                                  | 6                  |
| Search                             | 8  | Present full electronic search strategy for at least one database, including any limits used, such that it could be repeated.                                                                                                                                                                               | Appendix 1         |
| Study selection                    | 9  | State the process for selecting studies (i.e., screening, eligibility, included in systematic review, and, if applicable, included in the meta-analysis).                                                                                                                                                   | 6                  |
| Data collection process            | 10 | Describe method of data extraction from reports (e.g., piloted forms, independently, in duplicate) and any processes for obtaining and confirming data from investigators.                                                                                                                                  | 6                  |
| Data items                         | 11 | List and define all variables for which data were sought (e.g., PICOS, funding sources) and any assumptions and simplifications made.                                                                                                                                                                       | 6-7                |
| Risk of bias in individual studies | 12 | Describe methods used for assessing risk of bias of individual studies (including specification of whether this was done at the study or outcome level), and how this information is to be used in any data synthesis.                                                                                      | 7-8                |
| Summary measures                   | 13 | State the principal summary measures (e.g., risk ratio, difference in means).                                                                                                                                                                                                                               | 8                  |
| Synthesis of results               | 14 | Describe the methods of handling data and combining results of studies, if done, including measures of consistency (e.g., $I^2$ for each meta-analysis)                                                                                                                                                     | 8                  |

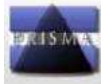

# PRISMA 2009 Checklist

Page 1 of 2

| Section/topic                 | #  | Checklist item                                                                                                                                                                                           | Reported on page # |
|-------------------------------|----|----------------------------------------------------------------------------------------------------------------------------------------------------------------------------------------------------------|--------------------|
| Risk of bias across studies   | 15 | Specify any assessment of risk of bias that may affect the cumulative evidence (e.g., publication bias, selective reporting within studies).                                                             | 8                  |
| Additional analyses           | 16 | Describe methods of additional analyses (e.g., sensitivity or subgroup analyses, meta-regression), if done, indicating which were pre-specified.                                                         | 8                  |
| <b>RESULTS</b>                |    |                                                                                                                                                                                                          |                    |
| Study selection               | 17 | Give numbers of studies screened, assessed for eligibility, and included in the review, with reasons for exclusions at each stage, ideally with a flow diagram.                                          | Figure 1           |
| Study characteristics         | 18 | For each study, present characteristics for which data were extracted (e.g., study size, PICOS, follow-up period) and provide the citations.                                                             | Appendix 2         |
| Risk of bias within studies   | 19 | Present data on risk of bias of each study and, if available, any outcome level assessment (see item 12).                                                                                                | 14 & table 4       |
| Results of individual studies | 20 | For all outcomes considered (benefits or harms), present, for each study: (a) simple summary data for each intervention group (b) effect estimates and confidence intervals, ideally with a forest plot. | 8-14 & figure 2    |
| Synthesis of results          | 21 | Present results of each meta-analysis done, including confidence intervals and measures of consistency.                                                                                                  | Figure 2           |
| Risk of bias across studies   | 22 | Present results of any assessment of risk of bias across studies (see Item 15).                                                                                                                          | 8-14 & table 4     |
| Additional analysis           | 23 | Give results of additional analyses, if done (e.g., sensitivity or subgroup analyses, meta-regression [see Item 16]).                                                                                    | N/A                |
| <b>DISCUSSION</b>             |    |                                                                                                                                                                                                          |                    |
| Summary of evidence           | 24 | Summarize the main findings including the strength of evidence for each main outcome; consider their relevance to key groups (e.g., healthcare providers, users, and policy makers).                     | 15-16              |
| Limitations                   | 25 | Discuss limitations at study and outcome level (e.g., risk of bias), and at review-level (e.g., incomplete retrieval of identified research, reporting bias).                                            | 16-17              |
| Conclusions                   | 26 | Provide a general interpretation of the results in the context of other evidence, and implications for future research.                                                                                  | 17-18              |
| <b>FUNDING</b>                |    |                                                                                                                                                                                                          |                    |
| Funding                       | 27 | Describe sources of funding for the systematic review and other support (e.g., supply of data); role of funders for the systematic review.                                                               | 19                 |

From: Moher D, Liberati A, Tetzlaff J, Altman DG, The PRISMA Group (2009). Preferred Reporting Items for Systematic Reviews and Meta-Analyses: The PRISMA Statement. PLoS Med 6(6): e1000097. doi:10.1371/journal.pmed1000097

For peer review only - <http://bmjopen.bmj.com/site/about/guidelines.xhtml>  
For more information, visit: [www.prisma-statement.org](http://www.prisma-statement.org).

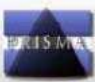

# PRISMA 2009 Checklist

- 1
- 2
- 3
- 4
- 5
- 6
- 7
- 8
- 9
- 10
- 11
- 12
- 13
- 14
- 15
- 16
- 17
- 18
- 19
- 20
- 21
- 22
- 23
- 24
- 25
- 26
- 27
- 28
- 29
- 30
- 31
- 32
- 33
- 34
- 35
- 36
- 37
- 38
- 39
- 40
- 41
- 42
- 43
- 44
- 45
- 46
- 47
- 48
- 49

For peer review only



**A systematic review of the effect of red blood cell transfusion on mortality: evidence from large scale observational studies published between 2006 and 2010**

|                                 |                                                                                                                                                                                                                                                                                                                                                                                                                                                |
|---------------------------------|------------------------------------------------------------------------------------------------------------------------------------------------------------------------------------------------------------------------------------------------------------------------------------------------------------------------------------------------------------------------------------------------------------------------------------------------|
| Journal:                        | <i>BMJ Open</i>                                                                                                                                                                                                                                                                                                                                                                                                                                |
| Manuscript ID:                  | bmjopen-2012-002154.R1                                                                                                                                                                                                                                                                                                                                                                                                                         |
| Article Type:                   | Research                                                                                                                                                                                                                                                                                                                                                                                                                                       |
| Date Submitted by the Author:   | 11-Mar-2013                                                                                                                                                                                                                                                                                                                                                                                                                                    |
| Complete List of Authors:       | Hopewell, Sally; University of Oxford, Centre for Statistics in Medicine<br>Omar, Omar; University of Oxford, Centre for Statistics in Medicine<br>Yu, Ly-Mee; University of Oxford, Centre for Statistics in Medicine<br>Hyde, Chris; University of Exeter, Peninsula College of Medicine & Dentistry<br>Doree, Carolyn; John Radcliffe Hospital, NHS Blood and Transplant<br>Murphy, Mike; John Radcliffe Hospital, NHS Blood and Transplant |
| <b>Primary Subject Heading</b>: | Evidence based practice                                                                                                                                                                                                                                                                                                                                                                                                                        |
| Secondary Subject Heading:      | Haematology (incl blood transfusion)                                                                                                                                                                                                                                                                                                                                                                                                           |
| Keywords:                       | EPIDEMIOLOGY, Blood bank & transfusion medicine < HAEMATOLOGY, INTENSIVE & CRITICAL CARE                                                                                                                                                                                                                                                                                                                                                       |
|                                 |                                                                                                                                                                                                                                                                                                                                                                                                                                                |

SCHOLARONE™  
Manuscripts

1  
2  
3  
4  
5  
6  
7  
8 **A systematic review of the effect of red blood cell transfusion on**  
9  
10 **mortality: evidence from large scale observational studies published**  
11  
12 **between 2006 and 2010**  
13  
14  
15  
16  
17  
18  
19

20 Sally Hopewell<sup>1,2</sup>, Omar Omar<sup>2</sup>, Chris Hyde<sup>3</sup>, Ly-Mee Yu<sup>2</sup>, Carolyn Doree<sup>1</sup>, Mike F. Murphy<sup>1</sup>  
21  
22  
23

- 24  
25 1. Systematic Review Initiative, NHS Blood and Transplant, Department of  
26 Haematology, Oxford University Hospitals and University of Oxford, UK.  
27  
28 2. Centre for Statistics in Medicine, University of Oxford, Oxford, UK  
29  
30 3. PenTAG, Peninsula College of Medicine and Dentistry, Exeter, UK  
31  
32  
33  
34

35 Correspondence to:

36  
37 Dr Sally Hopewell, Centre for Statistics in Medicine, University of Oxford, Wolfson College,  
38 Linton Road, Oxford, OX2 6UD, UK. Tel: +44 1865 284400; Fax: +44 1865 284424; Email:  
39 [sally.hopewell@csm.ox.ac.uk](mailto:sally.hopewell@csm.ox.ac.uk)  
40  
41  
42  
43

44 **Keywords**

45  
46 Systematic review, observational studies, transfusion, mortality.  
47

48 Word count 4324  
49  
50  
51  
52  
53  
54  
55  
56  
57  
58  
59  
60

**ABSTRACT**

**Objective:** To carry out a systematic review of recently published large scale observational studies assessing the effect of red blood cell transfusion (RBCT) on mortality , with particular emphasis on the statistical methods used to adjust for confounding. Given the limited number of randomized trials of the efficacy of RBCT, clinicians often use evidence from observational studies. However, confounding factors, for example individuals receiving blood generally being sicker than those who do not, makes their interpretation challenging.

**Design:** Systematic review.

**Information sources:** We searched MEDLINE and EMBASE for studies published from 1 January 2006 to 31 December 2010.

**Eligibility criteria for included studies:** We included prospective cohort, case control studies or retrospective analyses of databases or disease registers where the effect of risk factors for mortality or survival was examined. Studies must have included more than 1000 participants receiving RBCT for any cause. We assessed the effects of RBCT versus no RBCT and different volumes and age of RBCT.

**Results:** Thirty two studies were included in the review; 23 assessed the effects of RBCT versus no RBCT; five assessed different volumes and four older versus newer RBCT. There was considerable variability in the patient populations, study designs and level of statistical adjustment. Overall, most studies showed a higher rate of mortality when comparing patients who received RBCT with those who did not, even when these rates were adjusted for confounding; the majority of these increases were statistically significant. The same pattern was observed in studies where protection from bias was likely to be greater, such as prospective studies.

**Conclusion:** Recent observational studies do show a consistent adverse effect of RBCT on mortality. Whether this is a true effect remains uncertain as it is possible that even the best conducted adjustments cannot completely eliminate the impact of confounding.

1  
2  
3  
4  
5  
6  
7  
8  
9  
10  
11  
12  
13  
14  
15  
16  
17  
18  
19  
20  
21  
22  
23  
24  
25  
26  
27  
28  
29  
30  
31  
32  
33  
34  
35  
36  
37  
38  
39  
40  
41  
42  
43  
44  
45  
46  
47  
48  
49  
50  
51  
52  
53  
54  
55  
56  
57  
58  
59  
60

For peer review only



**ARTICLE SUMMARY****Article focus**

- Given the limited number of randomized trials of the efficacy of red blood cell transfusion (RBCT), clinicians often use evidence from observational studies.
- Confounding factors, for example individuals receiving blood generally being sicker than those who do not, can make their interpretation challenging.
- Our objective was to systematically review large observational studies (n>1000 patients) published in the last five years assessing the effect of RBCT on mortality, with particular emphasis on the statistical methods used to adjust for confounding.

**Key messages**

- We identified considerable variability in the patient populations, study designs and level of statistical adjustment.
- Most studies showed higher mortality rates when comparing patients who received RBCT with those who did not, even when adjusting for confounding. We identified similar patterns in studies where protection from bias was likely to be greatest.

**Strengths and limitations of this study**

- Overall, observational studies do show a consistent adverse effect of RBCT on mortality.
- However, even the best conducted adjustments for confounding cannot completely eliminate its impact, particularly when investigating the effect of RBCT on mortality.

## Introduction

Randomized controlled trials are considered the gold standard with which to evaluate the efficacy of a particular health care intervention. In 2005, Blajchman (1) published a study that explored the impact that ten landmark randomized controlled trials have had on the practice of transfusion medicine. The use of randomized trials to evaluate transfusion medicine has only been established since the 1980s (1). Given the limited number of high quality randomized trials of the efficacy of blood transfusion and the challenges of conducting new trials, clinicians often rely on evidence from observational studies. In a randomized trial patients are allocated to comparison groups at random, so the level of disease is likely to be similar in each group and differences in disease severity unlikely to be the explanation for any differences in outcome seen. In an observational study, the groups of patients being compared are not likely to be comparable and the differences in prognostic factors may of themselves lead to difference in outcome. The impact of such “confounding” can be reduced by adjustment in the statistical analysis, but the success of this is dependent on the technique used, complete identification of the factors which might influence outcome and their accurate measurement in the patients in the study (2). As all the factors influencing outcome may never be known, adjustment is unlikely to ever completely account for the confounding occurring in observational studies. The unknown inter-dependence of multiple factors is also a major challenge.

There is increasing implementation of restrictive policies for transfusion, and evidence of reduction in blood use in several countries such as the United Kingdom (UK) and the United States of America (USA) with no evidence of poorer clinical outcomes(3;4). However, there remains considerable variation between hospitals in blood reduction in the UK (5) and elsewhere (6) suggesting that overall blood usage could be further reduced without compromising patient safety. Observational studies may have influenced these changes in transfusion practice along with evidence from randomized controlled trials, national

1  
2  
3 guidelines, and process driven initiatives, but the impact that the contribution of data from  
4  
5 observational studies has made to the practice of transfusion medicine has not been  
6  
7 systematically explored. The aims of this systematic review were therefore to identify  
8  
9 recently published (2006 to 2010), large scale observational studies assessing the effects of  
10  
11 red blood cell transfusion (RBCT) on mortality. In particular we aimed to critique the  
12  
13 statistical methods, and the assumptions made in the analyses of the observational data,  
14  
15 and to consider the validity of these data as an evidence base for the practice of transfusion  
16  
17 medicine and to inform future research in this field.  
18  
19

## 20 21 22 **Methods**

### 23 24 **Criteria for selecting studies**

#### 25 26 Type of participants

27  
28 We included both adults and children receiving RBCT for any cause. We also included studies  
29  
30 which stated that patients received red blood cells and other blood products. When  
31  
32 reported by the primary studies we assessed the effects of RBCT separately from other  
33  
34 blood products.  
35  
36

#### 37 38 39 Type of intervention and comparator

40  
41 We included the following risk factors:

- 42  
43 • RBCT versus no RBCT
- 44  
45 • Volume 'A' of RBCT versus volume 'B' of RBCT (as defined by the primary studies)
- 46  
47 • 'Older' RBCT versus 'newer' RBCT (as defined by the primary studies)
- 48  
49

#### 50 51 52 Type of outcome measure

53  
54 Our primary outcome measure was death, mortality or survival measured at any time point.  
55  
56  
57  
58  
59  
60

### Type of studies

We included prospective cohort, case control studies or retrospective analyses of databases or disease registers where the effect of the above risk factors on death, mortality or survival is examined. Studies must have included more than 1000 participants. This was a pragmatic limit designed to focus attention on studies most likely to have had an impact and least likely to have been affected by chance.

### **Search strategy**

We carried out a comprehensive search (21 January 2011) of MEDLINE and EMBASE for studies published from 1 January 2006 to 31 December 2010 using the strategies in Appendix 1. Again we chose to use a pragmatic approach and limited our search to studies published in the last five years. We also excluded conference abstracts unless they had subsequently been published as full articles.

### **Data collection and analysis**

One review author (CD) initially screened all search results for relevance against the eligibility criteria and discarded all those that were clearly irrelevant. Thereafter, another author (SH) independently screened all remaining hits. We retrieved full text articles for all those references where we are unable to decide on eligibility based on the title and abstract alone. All full text articles were independently screened by two review authors (SH, MM) to ensure that they met the eligibility criteria.

### **Data extraction and management**

Two review authors (SH, OO) independently extracted data from all included studies. Any disagreements were resolved by discussion or by consulting a third author if there was still uncertainty. We extracted data on the following study characteristics: the study design, how

1  
2  
3 patients were recruited, the country where the study was conducted, the source of funding,  
4  
5 the type of participants, their age, disease area, setting, the type of intervention /  
6  
7 comparator and nature of the exposure, the number of participants in each group, whether  
8  
9 any formal prescribing guidance was reported, the type of outcome measure (i.e. mortality)  
10  
11 and the time point at which it was measured.  
12  
13

14  
15  
16 We also extracted information on the statistical methods used to adjust for differences  
17  
18 between study groups, in particular the number of study covariates measured, whether  
19  
20 important covariates relating to red cell transfusion were assessed (i.e. age, sex, co-  
21  
22 morbidity, hemoglobin) and whether these were incorporated into the analysis, whether the  
23  
24 choice of covariates were pre-specified or data driven and the statistical model used for the  
25  
26 statistical adjustment. We also assessed the effects of smoking as a study covariate in  
27  
28 relation to blood transfusion and its effect on mortality. In terms of the study results we  
29  
30 extracted data on the presentation of both the unadjusted and adjusted result for the effect  
31  
32 of red cell transfusion on mortality as reported by each study. If not reported by the primary  
33  
34 study we calculated (where there were sufficient data) the odds ratio for the effect of blood  
35  
36 transfusion on mortality for unadjusted analyses using STATA (version 11). We assessed, for  
37  
38 the unadjusted and adjusted result, whether the study reported summary statistics for each  
39  
40 comparison group, the treatment effect, confidence interval, p value and whether the result  
41  
42 was statistically significant. If a study reported more than one adjusted analysis we selected  
43  
44 in order of preference (i) the main adjusted analysis mentioned in the abstract, (ii) the main  
45  
46 adjusted analysis mentioned in the conclusions, (iii) the main adjusted analysis mentioned in  
47  
48 the results section. If mortality was assessed for more than one time point (i.e. at 30 days  
49  
50 and 1 year) then we used the shorter time point in our analysis.  
51  
52  
53  
54  
55

#### 56 57 **Assessment of methodological quality** 58 59 60

1  
2  
3 We also assessed whether studies met important methodological criteria for the reporting  
4 of observational studies (2): whether the samples were representative of those to whom the  
5 results might be generalised, whether important covariates in relation to RBCT and mortality  
6 (e.g. sex, age, smoking, co-morbidity, hemoglobin level) were measured and incorporated  
7 into the analysis, whether the method of dealing with confounding between patient groups  
8 was adequate, whether a statistician was listed as an author of the study and whether the  
9 data were collected prospectively following an agreed study design. We included smoking as  
10 a covariate as, while not directly correlated with transfusion, it is considered important  
11 when assessing mortality.  
12  
13  
14  
15  
16  
17  
18  
19  
20  
21  
22  
23  
24

#### 25 **Method of analysis**

26 We have presented the results separately for the three different types of comparisons.  
27 Within each, due to the varied nature of the clinical conditions, study designs and level of  
28 statistical adjustment, we decided a priori not to combine the results of individual studies in  
29 a meta-analysis and instead present the results of the individual studies descriptively in the  
30 text, tables and figures.  
31  
32  
33  
34  
35  
36  
37  
38  
39

#### 40 **Results**

41 Searches of MEDLINE and EMBASE identified 4318 possible records. 4272 did not meet the  
42 eligibility criteria for this study. Full articles were retrieved for 45 studies; 13 further studies  
43 were excluded as they did not fulfil our eligibility criteria (see Appendix 2 for list of excluded  
44 studies). Thirty two studies were included in the review; 23 (7-30) studies assessed the  
45 effects of RBCT versus no RBCT, five studies (31-35) assessed different volumes of RBCT and  
46 four (36-39) assessed giving older versus newer RBCT (see Figure 1).  
47  
48  
49  
50  
51  
52  
53  
54  
55  
56

#### 57 **Red blood cell transfusion versus no red blood cell transfusion**

1  
2  
3 Twenty three studies (7-30) assessed the effects of RBCT versus no RBCT on mortality. Four  
4  
5 of these studies (8;12;14;21) included both red cell transfusion and other blood products  
6  
7 (e.g. platelets, plasma, cryoprecipitate); for one study, data were available separately for  
8  
9 RBCT and mortality (14). For three studies it was unclear if other blood products were  
10  
11 transfused along with red blood cells (11;13;22).  
12  
13

#### 14 15 16 *Study characteristics (Table 1)*

17  
18 Eight studies were prospective cohort studies following up a planned group of patients  
19  
20 (7;8;15;16;18;24-27), the other 15 studies assessed data from a retrospective patient  
21  
22 registry or database. Fourteen studies were conducted in the USA, two in the UK, two in  
23  
24 Israel and the remainder in Belgium, the Netherlands, Iran and Denmark; one study was  
25  
26 conducted in multiple countries. The time period assessed was between 1989 and 2008.  
27  
28 Twelve of the studies (7;9;11;12;15-18;20-22;24;26) specifically looked at adults undergoing  
29  
30 cardiac surgery, five were in patients in the intensive care unit (10;25;27;29;30), two were in  
31  
32 adults trauma patients (8;28), two were in patients following hip fracture/replacement  
33  
34 (13;19) one was in oncology patients (14) and the other in pediatric trauma patients (23).  
35  
36 Three of the studies (12;20;21) specifically looked at the effects of RBCT in older adults (e.g.  
37  
38 > 60 years). The size of the studies varied from 1,624 participants to 504,208 participants  
39  
40 with an overall median sample size of 4344 (IQR 2085 to 11963); median 1068 (IQR 430 to  
41  
42 5812) for patients undergoing RBCT compared to median 2325 (IQR 1636 to 6151) for  
43  
44 patient with no RBCT. The time period at which mortality was assessed also varied across  
45  
46 studies from in-hospital to mortality at seven years; the most common time point being  
47  
48 mortality at or within 30 days. Several studies reported mortality for more than one time  
49  
50 period. Only seven of the 23 studies provided any mention of guidelines for the prescription  
51  
52 of RBCT; two studies said no formal protocol was used (8;23), two studies stated a  
53  
54 hemoglobin of <8g/dl (10;13), one study stated a hematocrit of less than 25-26% (22) and  
55  
56  
57  
58  
59  
60

1  
2  
3 two studies said prescription was at the discretion of the patient care team (24;25). For full  
4  
5 details of the characteristics of the included studies see Appendix 3.  
6  
7

8  
9  
10 *Statistical methods (Table 2)*

11 All 23 studies provided information on the statistical methods used to adjust for differences  
12  
13 in the baseline characteristics of patients who received RBCT and those who did not.  
14  
15 However, the amount of detail and appropriateness of the method used varied across  
16  
17 studies. In 13 studies (7;9;10;14-19;22;24;25;27;30) the choices of covariates measured  
18  
19 were reported as pre-specified and not data driven, but this was unclear for the remaining  
20  
21 10 studies. The number of covariates measured and incorporated in the analysis also varied  
22  
23 across studies with half the studies reported to assess more than 20 different covariates.  
24  
25 Despite the high number of covariates assessed in these studies, not all measured covariates  
26  
27 which appeared to be of specific importance in relation to RBCT. All of the 23 studies did  
28  
29 report measuring the age and sex of the patients and 21 reported measuring patient co-  
30  
31 morbidity. Overall, only eight (7;11;12;15-18;22;29) studies measured and incorporated the  
32  
33 covariates age, sex, smoking, co-morbidity and haemoglobin level into the adjusted analysis..  
34  
35 Fourteen of the 23 studies reported using logistic regression (i.e. mortality was reported as a  
36  
37 binary outcome) as the method of adjusting for differences in the baseline characteristics  
38  
39 between the two patients groups; six studies reported using Cox proportional hazard (i.e.  
40  
41 mortality was reported as a time to event outcome) and three studies reporting using both  
42  
43 methods; in these three studies mortality was assessed for more than one time period. Nine  
44  
45 studies (7;12;17-19;21;27;29) reported using propensity scores prior to adjusting for  
46  
47 confounders, however, sometimes this matching was only using a much smaller subgroup of  
48  
49 patients. For full details of the statistical methods see Appendix 4.  
50  
51  
52  
53  
54

55  
56  
57 *Presentation of adjusted and unadjusted results (Table 3)*  
58  
59  
60



1  
2  
3 There were marked differences in the presentation and reporting of the unadjusted and  
4  
5 adjusted results when comparing the effects of RBCT versus no RBCT on mortality. Seven of  
6  
7 the 23 studies reported a summary statistic for each group for both the unadjusted and  
8  
9 adjusted analysis. Five studies reported a summary statistics for only the unadjusted analysis  
10  
11 and one study for the adjusted analysis only; no summary statistic comparing the effects of  
12  
13 RBCT versus no RBCT on mortality was reported in the remained 10 studies. Eight studies  
14  
15 reported the treatment effect (e.g. odds ratio, risk ratio, hazard ratio) and the corresponding  
16  
17 confident interval (six studies) for both the unadjusted and adjusted analysis (7;15;16;18-  
18  
19 20;24;26;30), whereas 12 studies reported the treatment effect and confident interval (10  
20  
21 studies) for adjusted analysis only and one study for the unadjusted analysis only. Where  
22  
23 possible we calculated the odds ratio for the effect of RBCT on mortality for unadjusted  
24  
25 analyses if it was not reported in the published article.  
26  
27  
28  
29  
30

31  
32 Seventeen of the 23 studies reported a statistically significant result for the unadjusted  
33  
34 analysis, and 15 for the adjusted analysis (Figure 2), when comparing the effect of RBCT  
35  
36 versus no RBCT on mortality, with more deaths occurring in patients receiving transfusion.  
37  
38 This effect was statistically non-significant in seven studies based on the result of the  
39  
40 adjusted analysis. Prospective studies were more likely to show a statistically significant  
41  
42 effect for blood transfusion on mortality compared to retrospective studies for both the  
43  
44 unadjusted and adjusted analysis. For full details see Appendix 5.  
45  
46  
47

#### 48 **Volume 'A' red blood versus volume 'B' red blood cells**

49  
50 Five studies (31-35) assessed the effect of different volumes of RBCT on mortality. One of  
51  
52 these studies (35) included both RBCT and other blood products.  
53  
54  
55

56  
57 *Study characteristics (Table 1)*  
58  
59  
60

1  
2  
3 One study assessed a prospective cohort and followed up a planned group of patients (35),  
4  
5 the other four studies assessed data from a retrospective patient registry or database. Two  
6  
7 of the studies (33;35) specifically looked at adults undergoing cardiac surgery, one was in  
8  
9 trauma patients (32), one was in patients undergoing major surgery (31) and one in patients  
10  
11 in the intensive care unit (34). The size of the studies varied from 1,841 participants to  
12  
13 125,177 participants, with an overall median sample size of 8215 (IQR 3037 to 8799). The  
14  
15 volume of RBCT varied considerably across studies from 1-2 units to more than eight units.  
16  
17 The time period at which mortality was assessed also varied across studies from in-hospital  
18  
19 to mortality at eight years. Three of the five studies provided any mention of guidelines for  
20  
21 the prescription of red blood cells, however only one gave any specific requirement stating a  
22  
23 hemoglobin of <8g/dl (34) (See Appendix 3).  
24  
25  
26  
27  
28

#### 29 *Statistical methods (Table 2)*

30  
31 All five studies provided information on the statistical methods used to adjust for differences  
32  
33 in the baseline characteristics of patients who received different volumes of red blood  
34  
35 transfusion, however, as with the studies of RBCT versus no RBCT, the amount of detail and  
36  
37 appropriateness of the method used varied across studies. In all five studies (31-35) the  
38  
39 choices of covariates measured were reported as pre-specified. The number of covariates  
40  
41 measured and incorporated in the analysis varied across studies with two the studies  
42  
43 reported to assess more than 20 different covariates. Once again, despite the high number  
44  
45 of covariates assessed in these studies, not all measured covariates seem to be of specific  
46  
47 importance in relation to RBCT. All five studies reported measuring age and sex and patient  
48  
49 co-morbidity, however, one (31) measured and incorporated the covariates age, sex,  
50  
51 smoking, co-morbidity and hemoglobin level into the adjusted analysis.  
52  
53  
54  
55  
56

#### 57 *Presentation of adjusted and unadjusted results (Table 3)*

1  
2  
3 As with the studies of RBCT versus no RBCT, there were marked difference in the  
4 presentation and reporting of the unadjusted and adjusted results when comparing the  
5 effects of different volumes of RBCT on mortality. Two studies reported a statistically  
6 significant result for the adjusted analysis with more deaths occurring in patients receiving  
7 larger volumes of RBCT. This effect was statistically non significant in two studies based on  
8 the result for adjusted analysis and was not reported for the remaining one study. No  
9 studies reported on the statistical significance of the result of the unadjusted analysis (See  
10 Appendix 4 and 5).  
11  
12  
13  
14  
15  
16  
17  
18  
19

### 20 21 22 **'Older' red blood cells versus 'newer' red blood cells**

23  
24 Four (36-39) studies assessed the effects of age of RBCT on mortality, one of which  
25 specifically looked at leukodepleted RBCT (39).  
26  
27  
28  
29  
30

#### 31 *Study characteristics (Table 1)*

32  
33 All four studies assessed data from a retrospective patient registry or database. Two of the  
34 studies (37;38) specifically looked at adults undergoing cardiac surgery, one was in trauma  
35 patients (39), while the other did not mention a specific patient group. The size of the  
36 studies varied from 1,813 participants to 364,037 participants, with an overall median  
37 sample size of 4358 (IQR 2264 to 185019). The period of time in which the blood was stored  
38 varied considerably across studies. Two studies (37;39) assessed RBCT stored for less than 14  
39 days compared to those stored for more than 14 days, one study (38) compared blood  
40 stored for less than 18 days and with blood stored for more than 18 days and one study (36)  
41 looked at multiple storage periods ranging from 1 to 42 days. None of the studies provided  
42 any mention of guidelines for the prescription of red blood cells (See Appendix 2).  
43  
44  
45  
46  
47  
48  
49  
50  
51  
52  
53  
54

#### 55 56 57 *Statistical methods (Table 2)*

1  
2  
3 All four studies provided information on the statistical methods used to adjust for  
4 differences in the baseline characteristics of patients who received RBCT stored for different  
5 time periods, however, once again the amount of detail and appropriateness of the method  
6 used varied across studies. The number of covariates measured and incorporated in the  
7 analysis also varied across studies. All of the four studies reported measuring the age and  
8 sex of the participants. Only two studies reported measuring patient hemoglobin levels and  
9 three studies reported assessing patient co-morbidities. Only one (37) of the four studies  
10 measured and incorporated the covariates age, sex, smoking, co-morbidity and haemoglobin  
11 level into the adjusted analysis.  
12  
13  
14  
15  
16  
17  
18  
19  
20  
21  
22  
23

#### 24 *Presentation of adjusted and unadjusted results (Table 3)*

25  
26 As with the studies of RBCT versus no RBCT and of volume 'A' red blood cells versus volume  
27 'B' RBCT, there were marked differences in the presentation and reporting of the unadjusted  
28 and adjusted results when comparing the effects of RBCT stored for different time periods  
29 on mortality. Two studies reported a statistically significant result for the unadjusted  
30 analysis and one study reported a statistically significant result for the adjusted analysis. In  
31 two of these three studies there were more deaths occurring in patients receiving older  
32 blood and in one study there were more deaths in patients receiving newer blood. This  
33 effect was statistically non significant in three studies based on the result for adjusted  
34 analysis (See Appendix 4 and 5).  
35  
36  
37  
38  
39  
40  
41  
42  
43  
44  
45  
46  
47

#### 48 **Assessment of methodological quality (Table 4)**

49  
50 Overall the assessment of methodological quality varied across studies and by study group  
51 with only 10 of the 32 included studies assessing a prospective cohort following up a  
52 planned group of patients over time, the remaining two-third of the studies assessed data  
53 from a retrospective patient registry or database. In most studies the sample of patients  
54  
55  
56  
57  
58  
59  
60

1  
2  
3 included in the study was considered representative of those to whom the results might be  
4  
5 generalised. Four studies (12;20;21;29) specifically focussed on older adults (>60 years) and  
6  
7 one study (23) on children, so the findings from these studies should only be interpreted in  
8  
9 relation to these specific patient groups. The baseline characteristics of patients who  
10  
11 received RBCT compared to those patients who did not receive RBCT (or patients who  
12  
13 received different volumes or age of blood) were often very different and so we wanted to  
14  
15 assess whether studies had adjusted for these differences when carrying out their statistical  
16  
17 analysis. Only 10 studies measured and incorporated in the analysis covariates which we  
18  
19 deemed of specific importance in relation to RBCT (i.e. age, sex, smoking, co-morbidity and  
20  
21 haemoglobin level), thus we deemed the method of dealing with confounding between  
22  
23 patient groups as adequate in only 31% of studies. Critically however, when we restricted  
24  
25 our analysis of results to studies with adequate methods, the pattern of an increase in  
26  
27 mortality associated with RBCT remained unchanged.  
28  
29  
30  
31  
32

## 33 Discussion

### 34 *Summary of main findings*

35  
36 We identified 32 observational studies of more than 1000 participants published between  
37  
38 2006 and 2010 assessing the effect of RBCT on mortality. Twenty three studies compared  
39  
40 RBCT versus no RBCT, five compared different volumes and four compared different storage  
41  
42 times. Overall there was considerable variability in the characteristics of the observational  
43  
44 studies. However, the majority, of studies were retrospective designs assessing patients  
45  
46 from an existing patient register or database.  
47  
48  
49  
50  
51

52  
53 We also identified considerable variability in the statistical methods used to adjust for  
54  
55 differences in the baseline characteristics of patients who received RBCT and those who did  
56  
57 not. It was often unclear if the choice of covariates measured and used in the adjusted  
58  
59  
60

1  
2  
3 analyses were pre-specified at the start of the study or were driven by the underlying data.  
4  
5 Perhaps most importantly, around half of the 32 studies did not measure and adjust for  
6  
7 covariates which we deemed of specific importance to blood transfusion..  
8  
9

10  
11 Overall, more studies found a higher rate of mortality in patients receiving RBCT compared  
12  
13 with those who did not, and this effect was seen in both the adjusted and unadjusted  
14  
15 results. In general, where measured equivalently within the same study, the unadjusted  
16  
17 estimate of risk was greater than the adjusted risk, emphasising that adverse prognostic  
18  
19 factors are more common in patients receiving RBCT and that adjusting for them leads to a  
20  
21 smaller estimate of risk. Considering the adjusted risks, although the size of the effect was  
22  
23 not consistent across all studies, the direction of the effect was. Most studies suggest an  
24  
25 increased risk of mortality associated with RBCT. Further, those studies which were designed  
26  
27 prospectively and which used better methods of adjusting for differences in the baseline  
28  
29 characteristics between groups were more likely to show an increase in the risk of mortality  
30  
31 compared to studies which were based on retrospective registries or databases, although,  
32  
33 again the size of the effect was not consistent across all studies. However, it is important to  
34  
35 remember that even with the best methods of adjustment it cannot completely eliminate  
36  
37 the impact of confounding (2), as the sicker the patients (thus an increased risk of mortality)  
38  
39 the more likely they are to have received RBCT.  
40  
41  
42  
43  
44  
45

#### 46 *Comparison with other studies*

47

48 We are aware of one other systematic review of observational studies looking at the effects  
49  
50 of RBCT on mortality, which focussed specifically on critically ill adults in intensive care units  
51  
52 and adult trauma and surgical patients (40). This systematic review by Marik and colleagues  
53  
54 included more studies (n=45) than our review as it did not restrict its inclusion criteria to  
55  
56 studies with >1000 patients; the median number of patients analysed was 687. They also  
57  
58  
59  
60

1  
2  
3 found that RBCT was associated with an increased risk of mortality based on a meta-analysis  
4  
5 of 12 studies (odds ratio 1.7; 95% CI 1.4 to 1.9). However there was considerable  
6  
7 heterogeneity in the meta-analysis, suggesting that it might not have been appropriate to  
8  
9 combine the results of the individual studies and supports our decision not to conduct a  
10  
11 meta-analysis.  
12

13  
14  
15 In an overview of evidence from randomized controlled trials Wilkinson and colleagues (41)  
16  
17 identified 142 trials in RBCT. The majority compared the effects of leucoreduced RBCT or  
18  
19 different transfusion triggers (n=71). However, they did identify 12 trials comparing the  
20  
21 effects of RBCT versus no transfusion, seven looking at different volumes of RBCT and 11  
22  
23 different ages of red blood cells. The size of the trials was very small (median 30 to 40  
24  
25 patients) and the overview did not specifically examine the effect of RBCT on mortality.  
26  
27 Currently, we are aware of at least 14 ongoing or recently completed randomized controlled  
28  
29 trials examining the effects of the age of RBCT on clinical outcomes including the ARIPI (Age  
30  
31 of Red blood cells In Premature Infants) (42) ABLE, (Age of Blood Evaluation trial in the  
32  
33 resuscitation of critically ill patients) (43), RECESS (REd CELL Storage duration Study) (44) and  
34  
35 INFORM (Effects of transfusing fresh versus standard-issue red cells on in-hospital mortality)  
36  
37 trials, for which mortality or survival is a specified outcome measure.  
38  
39  
40  
41  
42  
43

#### 44 *Limitations*

45  
46 Our study has several limitations. Firstly, we only included studies published in the last five  
47  
48 years and which included more than 1,000 patients. This was because we took a pragmatic  
49  
50 approach as we hypothesised that more recent studies were more likely to use better  
51  
52 statistical methods and also that studies with a larger sample size were more likely to show a  
53  
54 truer effect of the intervention (45) . Thus we aimed to provide a “snap shot” of current  
55  
56 practice rather provide a comprehensive review of all available evidence. It is possible  
57  
58  
59  
60

1  
2  
3 therefore that the overall effect seen here might be different in older studies and/or in  
4 those carried out in smaller numbers of patients. Secondly, we decided not to combine the  
5 results of individual studies because of the variability in clinical settings and study methods,  
6 and instead presented the results of individual studies descriptively in the text and in tables  
7 and figures. More formal statistical analysis might have given a more precise indication of  
8 the overall effect of red cell transfusion on mortality, but would have ignored the significant  
9 amount of clinical and methodological heterogeneity between studies which we identified a  
10 priori and which was very apparent in the analysis done by Marik and colleagues (40).  
11 However, in the absence of a more formal statistical analysis we have inevitably had to rely  
12 on a vote-counting approach which also has great dangers, particularly the assumption that  
13 each included study has equal weight. Our main protection against this is the very  
14 pronounced nature of the pattern we have observed and the fact that we have limited our  
15 conclusions to the direction of effect.  
16  
17  
18  
19  
20  
21  
22  
23  
24  
25  
26  
27  
28  
29  
30  
31  
32

33 Finally, we limited our inclusion criteria to published articles and excluded unpublished  
34 studies or those published only as conference abstracts; thus our study could be subject to  
35 publication bias , as studies which did not show a significant effect of red cell transfusion on  
36 mortality might be less likely to be published in full (46). Outcome reporting bias may also be  
37 a problem, although difficult to combat, in the case where a risk has been measured at  
38 different time points but only those time points which are “positive” are reported. However,  
39 in the case of both publication and outcome reporting bias, the extreme nature of the  
40 pattern makes it relatively implausible that there are sufficient unpublished studies or time  
41 points to reverse it.  
42  
43  
44  
45  
46  
47  
48  
49  
50  
51  
52  
53  
54

55 *Implications for clinical practice*  
56  
57  
58  
59  
60



1  
2  
3 In recent years, many developed countries including the UK, USA and Australia have  
4 developed national initiatives for better blood transfusion practice, sometimes called  
5 'patient blood management' (4;5). These include the development of guidelines on blood  
6 usage promoting restrictive transfusion strategies and initiatives for using alternatives to  
7 transfusion (e.g. cell salvage techniques; improvements in the education and training of  
8 clinical staff prescribing blood; the provision of mechanisms for reviewing blood use with  
9 feedback of data to clinicians). National data on blood usage in the USA suggests an  
10 estimated decline of 3% over each of the last two years (2009-2010) (4), and similar data are  
11 available in the UK where the demand for red cell units, which steadily increased during the  
12 1990s, has decreased by about 20% in the last 10 years. However, there remains  
13 considerable variation between hospitals in blood reduction, and national audits of blood  
14 components in the UK and elsewhere suggest that overall blood usage could be further  
15 reduced without compromising patient safety (3).

16  
17  
18  
19  
20  
21  
22  
23  
24  
25  
26  
27  
28  
29  
30  
31  
32  
33 It is difficult to assess how observational studies may have influenced these changes in  
34 transfusion practice in comparison to evidence from randomized controlled trials, national  
35 guidelines, and process driven initiatives. The most likely answer is that they have all played  
36 a role in changing practice. Randomized controlled trials have found that 'restrictive'  
37 transfusion strategies are associated with similar or improved clinical outcomes compared to  
38 'liberal' transfusion strategies (47). Many national guidelines have adopted restrictive  
39 transfusion strategies (47), while needing to make assumptions about the generalisability of  
40 the findings of randomized controlled trials in specific clinical groups of patients. There have  
41 been many smaller observational studies of process initiatives to reduce transfusion that  
42 also indicate reductions in the use of blood without any significant impact on clinical  
43 outcomes (48-50).

### Conclusion

The findings from this systematic review of recent large scale observational studies show considerable variability in the patient populations and study methods when comparing the effects of RBCT on mortality. Overall, observational studies do show a consistent adverse effect of RBCT on mortality. Although it seems unlikely that this can be entirely explained by selective sampling or a predominance of poorer quality observational studies, it remains possible that even the best conducted adjustments cannot completely eliminate the impact of confounding. ...

**Author contributions:** SH and OO were involved in the design, implementation, and analysis of the study and in writing the final manuscript. CH, MM and LY were involved in the design and analysis of the study and in writing the final manuscript.

**Financial disclosures:** None reported.

**Funding/support:** This study was funded by NHS Blood and Transplant, Research and Development, UK.

**Additional contributions:** We are grateful to Susan Brunskill for her helpful comments on this manuscript.

### References

- (1) Blajchman MA. Landmark studies that have changed the practice of transfusion medicine. *Transfusion* 2005 September;45(9):1523-30.
- (2) Deeks JJ, Dinnes J, D'Amico R, Sowden AJ, Sakarovitch C, Song F, Petticrew M, Altman DG. Evaluating non-randomised intervention studies. *Health Technol Assess* 2003;7(27):iii-173.
- (3) Murphy MF, Stanworth SJ, Yazer M. Transfusion practice and safety: current status and possibilities for improvement. *Vox Sang* 2011 January;100(1):46-59.
- (4) Goodnough LT, Shander A. Patient blood management. *Anesthesiology* 2012 June;116(6):1367-76.

- 1  
2  
3 (5) NHS blood transfusion and transplant / Royal College of Physicians national  
4 comparative audit of blood transfusion programme. [http://hospital](http://hospital.blood.co.uk/safe_use/clinical_audit/national_comparative/index.asp)  
5 [blood.co.uk/safe\\_use/clinical\\_audit/national\\_comparative/index](http://hospital.blood.co.uk/safe_use/clinical_audit/national_comparative/index.asp)  
6 [asp](http://hospital.blood.co.uk/safe_use/clinical_audit/national_comparative/index.asp) [accessed 5 March  
7 2013] 2013.
- 8  
9 (6) Bennett-Guerrero E, Zhao Y, O'Brien SM, Ferguson TB, Jr., Peterson ED, Gammie JS,  
10 Song HK. Variation in use of blood transfusion in coronary artery bypass graft  
11 surgery. *JAMA* 2010 October 13;304(14):1568-75.
- 12  
13 (7) Aronson D, Dann EJ, Bonstein L, Blich M, Kapeliovich M, Beyar R, Markiewicz W,  
14 Hammerman H. Impact of red blood cell transfusion on clinical outcomes in patients  
15 with acute myocardial infarction. *Am J Cardiol* 2008 July 15;102(2):115-9.
- 16  
17 (8) Bochicchio GV, Napolitano L, Joshi M, Bochicchio K, Meyer W, Scalea TM. Outcome  
18 analysis of blood product transfusion in trauma patients: a prospective, risk-adjusted  
19 study. *World J Surg* 2008 October;32(10):2185-9.
- 20  
21 (9) Engoren M, Habib RH, Hadaway J, Zacharias A, Schwann TA, Riordan CJ, Durham SJ,  
22 Shah A. The effect on long-term survival of erythrocyte transfusion given for cardiac  
23 valve operations. *Ann Thorac Surg* 2009 July;88(1):95-100, 100.
- 24  
25 (10) Engoren M, Arslanian-Engoren C. Long-term survival in the intensive care unit after  
26 erythrocyte blood transfusion. *Am J Crit Care* 2009 March;18(2):124-31.
- 27  
28 (11) Garty M, Cohen E, Zuchenko A, Behar S, Boyko V, Iakobishvili Z, Mittelman M, Battler  
29 A, Shotan A, Gottlieb S, Caspi A, Hasdai D. Blood transfusion for acute  
30 decompensated heart failure--friend or foe? *Am Heart J* 2009 October;158(4):653-8.
- 31  
32 (12) Jani SM, Smith DE, Share D, Kline-Rogers E, Khanal S, O'Donnell MJ, Gardin J,  
33 Moscucci M. Blood transfusion and in-hospital outcomes in anemic patients with  
34 myocardial infarction undergoing percutaneous coronary intervention. *Clin Cardiol*  
35 2007 October;30(10 Suppl 2):II49-II56.
- 36  
37 (13) Johnston P, Wynn-Jones H, Chakravarty D, Boyle A, Parker MJ. Is perioperative blood  
38 transfusion a risk factor for mortality or infection after hip fracture? *J Orthop*  
39 *Trauma* 2006 November;20(10):675-9.
- 40  
41 (14) Khorana AA, Francis CW, Blumberg N, Culakova E, Refaai MA, Lyman GH. Blood  
42 transfusions, thrombosis, and mortality in hospitalized patients with cancer. *Arch*  
43 *Intern Med* 2008 November 24;168(21):2377-81.
- 44  
45 (15) Koch CG, Li L, Duncan AI, Mihaljevic T, Cosgrove DM, Loop FD, Starr NJ, Blackstone  
46 EH. Morbidity and mortality risk associated with red blood cell and blood-  
47 component transfusion in isolated coronary artery bypass grafting. *Crit Care Med*  
48 2006 June;34(6):1608-16.
- 49  
50 (16) Koch CG, Li L, Duncan AI, Mihaljevic T, Loop FD, Starr NJ, Blackstone EH. Transfusion  
51 in coronary artery bypass grafting is associated with reduced long-term survival. *Ann*  
52 *Thorac Surg* 2006 May;81(5):1650-7.
- 53  
54 (17) Murphy GJ, Reeves BC, Rogers CA, Rizvi SI, Culliford L, Angelini GD. Increased  
55 mortality, postoperative morbidity, and cost after red blood cell transfusion in  
56 patients having cardiac surgery. *Circulation* 2007 November 27;116(22):2544-52.
- 57  
58  
59  
60

- 1  
2  
3 (18) Nikolsky E, Mehran R, Sadeghi HM, Grines CL, Cox DA, Garcia E, Tchong JE, Griffin JJ,  
4 Guagliumi G, Stuckey T, Turco M, Fahy M, Lansky AJ, Stone GW. Prognostic impact of  
5 blood transfusion after primary angioplasty for acute myocardial infarction: analysis  
6 from the CADILLAC (Controlled Abciximab and Device Investigation to Lower Late  
7 Angioplasty Complications) Trial. *JACC Cardiovasc Interv* 2009 July;2(7):624-32.  
8  
9 (19) Pedersen AB, Mehnert F, Overgaard S, Johnsen SP. Allogeneic blood transfusion and  
10 prognosis following total hip replacement: a population-based follow up study. *BMC*  
11 *Musculoskelet Disord* 2009;10:167.  
12  
13 (20) Rogers MA, Blumberg N, Saint SK, Kim C, Nallamotheu BK, Langa KM. Allogeneic blood  
14 transfusions explain increased mortality in women after coronary artery bypass graft  
15 surgery. *Am Heart J* 2006 December;152(6):1028-34.  
16  
17 (21) Rogers MA, Blumberg N, Saint S, Langa KM, Nallamotheu BK. Hospital variation in  
18 transfusion and infection after cardiac surgery: a cohort study. *BMC Med* 2009;7:37.  
19  
20 (22) Salehiomran A, Ahmadi H, Karimi A, Tazik M, Dowlatshahi S, Fathollahi M.S., Abbasi  
21 S.H. Transfusion associated in-hospital mortality and morbidity in isolated coronary  
22 artery bypass graft surgery. *Central European Journal of Medicine* 2009;4(3):286-92.  
23  
24 (23) Stone TJ, Riesenman PJ, Charles AG. Red blood cell transfusion within the first 24  
25 hours of admission is associated with increased mortality in the pediatric trauma  
26 population: a retrospective cohort study. *J Trauma Manag Outcomes* 2008;2(1):9.  
27  
28 (24) Surgenor SD, Kramer RS, Olmstead EM, Ross CS, Sellke FW, Likosky DS, Marrin CA,  
29 Helm RE, Jr., Leavitt BJ, Morton JR, Charlesworth DC, Clough RA, Hernandez F,  
30 Frumiento C, Benak A, DioData C, O'Connor GT. The association of perioperative red  
31 blood cell transfusions and decreased long-term survival after cardiac surgery.  
32 *Anesth Analg* 2009 June;108(6):1741-6.  
33  
34 (25) Taylor RW, O'Brien J, Trottier SJ, Manganaro L, Cytron M, Lesko MF, Arnzen K,  
35 Cappadoro C, Fu M, Plisco MS, Sadaka FG, Veremakis C. Red blood cell transfusions  
36 and nosocomial infections in critically ill patients. *Crit Care Med* 2006  
37 September;34(9):2302-8.  
38  
39 (26) van Straten AH, Bekker MW, Soliman Hamad MA, van Zundert AA, Martens EJ,  
40 Schonberger JP, de Wolf AM. Transfusion of red blood cells: the impact on short-  
41 term and long-term survival after coronary artery bypass grafting, a ten-year follow-  
42 up. *Interact Cardiovasc Thorac Surg* 2010 January;10(1):37-42.  
43  
44 (27) Vincent JL, Sakr Y, Sprung C, Harboe S, Damas P. Are blood transfusions associated  
45 with greater mortality rates? Results of the Sepsis Occurrence in Acutely Ill Patients  
46 study. *Anesthesiology* 2008 January;108(1):31-9.  
47  
48 (28) Weinberg JA, McGwin G, Jr., Marques MB, Cherry SA, III, Reiff DA, Kerby JD, Rue LW,  
49 III. Transfusions in the less severely injured: does age of transfused blood affect  
50 outcomes? *J Trauma* 2008 October;65(4):794-8.  
51  
52 (29) Wu WC, Smith TS, Henderson WG, Eaton CB, Poses RM, Uttley G, Mor V, Sharma SC,  
53 Vezeridis M, Khuri SF, Friedmann PD. Operative blood loss, blood transfusion, and  
54 30-day mortality in older patients after major noncardiac surgery. *Ann Surg* 2010  
55 July;252(1):11-7.  
56  
57  
58  
59  
60

- 1  
2  
3 (30) Zilberberg MD, Stern LS, Wiederkehr DP, Doyle JJ, Shorr AF. Anemia, transfusions  
4 and hospital outcomes among critically ill patients on prolonged acute mechanical  
5 ventilation: a retrospective cohort study. *Crit Care* 2008;12(2):R60.  
6  
7 (31) Bernard AC, Davenport DL, Chang PK, Vaughan TB, Zwischenberger JB.  
8 Intraoperative transfusion of 1 U to 2 U packed red blood cells is associated with  
9 increased 30-day mortality, surgical-site infection, pneumonia, and sepsis in general  
10 surgery patients. *J Am Coll Surg* 2009 May;208(5):931-7, 937.  
11  
12 (32) Charles A, Shaikh AA, Walters M, Huehl S, Pomerantz R. Blood transfusion is an  
13 independent predictor of mortality after blunt trauma. *Am Surg* 2007  
14 January;73(1):1-5.  
15  
16 (33) O'Keeffe SD, Davenport DL, Minion DJ, Sorial EE, Endean ED, Xenos ES. Blood  
17 transfusion is associated with increased morbidity and mortality after lower  
18 extremity revascularization. *J Vasc Surg* 2010 March;51(3):616-21, 621.  
19  
20 (34) Ruttinger D, Wolf H, Kuchenhoff H, Jauch KW, Hartl WH. Red cell transfusion: an  
21 essential factor for patient prognosis in surgical critical illness? *Shock* 2007  
22 August;28(2):165-71.  
23  
24 (35) Weightman WM, Gibbs NM, Sheminant MR, Newman MA, Grey DE. Moderate  
25 exposure to allogeneic blood products is not associated with reduced long-term  
26 survival after surgery for coronary artery disease. *Anesthesiology* 2009  
27 August;111(2):327-33.  
28  
29 (36) Edgren G, Kamper-Jorgensen M, Eloranta S, Rostgaard K, Custer B, Ullum H, Murphy  
30 EL, Busch MP, Reilly M, Melbye M, Hjalgrim H, Nyren O. Duration of red blood cell  
31 storage and survival of transfused patients (CME). *Transfusion* 2010  
32 June;50(6):1185-95.  
33  
34 (37) Koch CG, Li L, Sessler DI, Figueroa P, Hoeltge GA, Mihaljevic T, Blackstone EH.  
35 Duration of red-cell storage and complications after cardiac surgery. *N Engl J Med*  
36 2008 March 20;358(12):1229-39.  
37  
38 (38) van de Watering L, Lorinser J, Versteegh M, Westendorp R, Brand A. Effects of  
39 storage time of red blood cell transfusions on the prognosis of coronary artery  
40 bypass graft patients. *Transfusion* 2006 October;46(10):1712-8.  
41  
42 (39) Weinberg JA, McGwin G, Jr., Griffin RL, Huynh VQ, Cherry SA, III, Marques MB, Reiff  
43 DA, Kerby JD, Rue LW, III. Age of transfused blood: an independent predictor of  
44 mortality despite universal leukoreduction. *J Trauma* 2008 August;65(2):279-82.  
45  
46 (40) Marik PE, Corwin HL. Efficacy of red blood cell transfusion in the critically ill: a  
47 systematic review of the literature. *Crit Care Med* 2008 September;36(9):2667-74.  
48  
49 (41) Wilkinson KL, Brunskill SJ, Doree C, Hopewell S, Stanworth S, Murphy MF, Hyde C.  
50 The clinical effects of red blood cell transfusions: an overview of the randomized  
51 controlled trials evidence base. *Transfus Med Rev* 2011 April;25(2):145-55.  
52  
53 (42) Fergusson DA, Hebert P, Hogan DL, LeBel L, Rouvinez-Bouali N, Smyth JA, Sankaran  
54 K, Tinmouth A, Blajchman MA, Kovacs L, Lachance C, Lee S, Walker CR, Hutton B,  
55 Ducharme R, Balchin K, Ramsay T, Ford JC, Kakadekar A, Ramesh K, Shapiro S. Effect  
56  
57  
58  
59  
60

1  
2  
3 of fresh red blood cell transfusions on clinical outcomes in premature, very low-  
4 birth-weight infants: the ARIPI randomized trial. *JAMA* 2012 October  
5 10;308(14):1443-51.  
6

- 7 (43) Lacroix J, Hebert P, Fergusson D, Tinmouth A, Blajchman MA, Callum J, Cook D,  
8 Marshall JC, McIntyre L, Turgeon AF. The Age of Blood Evaluation (ABLE) randomized  
9 controlled trial: study design. *Transfus Med Rev* 2011 July;25(3):197-205.  
10  
11 (44) Steiner ME, Assmann SF, Levy JH, Marshall J, Pulkrabek S, Sloan SR, Triulzi D, Stowell  
12 CP. Addressing the question of the effect of RBC storage on clinical outcomes: the  
13 Red Cell Storage Duration Study (RECESS) (Section 7). *Transfus Apher Sci* 2010  
14 August;43(1):107-16.  
15  
16 (45) Dechartres A, Boutron I, Trinquart L, Charles P, Ravaud P. Single-center trials show  
17 larger treatment effects than multicenter trials: evidence from a meta-epidemiologic  
18 study. *Ann Intern Med* 2011 July 5;155(1):39-51.  
19  
20 (46) Scherer RW, Langenberg P, von EE. Full publication of results initially presented in  
21 abstracts. *Cochrane Database Syst Rev* 2007;(2):MR000005.  
22  
23 (47) Goodnough LT, Levy JH, Murphy MF. Current concepts in transfusion. *Lancet*  
24 2013;[in press].  
25  
26 (48) Kotze A, Carter LA, Scally AJ. Effect of a patient blood management programme on  
27 preoperative anaemia, transfusion rate, and outcome after primary hip or knee  
28 arthroplasty: a quality improvement cycle. *Br J Anaesth* 2012 June;108(6):943-52.  
29  
30 (49) Freedman J, Luke K, Escobar M, Vernich L, Chiavetta JA. Experience of a network of  
31 transfusion coordinators for blood conservation (Ontario Transfusion Coordinators  
32 [ONTraC]). *Transfusion* 2008 February;48(2):237-50.  
33  
34 (50) Helm RE, Rosengart TK, Gomez M, Klemperer JD, DeBois WJ, Velasco F, Gold JP,  
35 Altorki NK, Lang S, Thomas S, Isom OW, Krieger KH. Comprehensive multimodality  
36 blood conservation: 100 consecutive CABG operations without transfusion. *Ann*  
37 *Thorac Surg* 1998 January;65(1):125-36.  
38  
39  
40  
41  
42  
43  
44  
45  
46  
47  
48  
49  
50  
51  
52  
53  
54  
55  
56  
57  
58  
59  
60

Figure 1: Flow diagram of study inclusion (1 January 2006 to 31 December 2010)

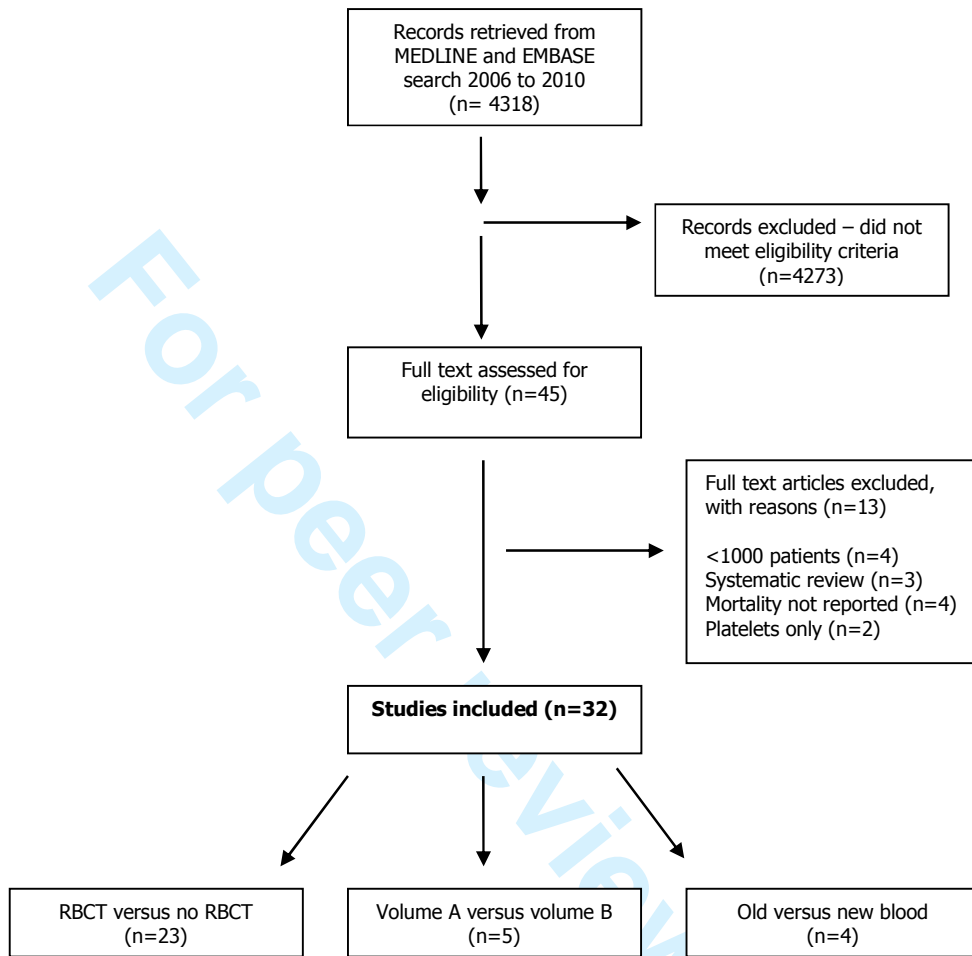

1  
2  
3  
4  
5  
6  
7  
8  
9  
10  
11  
12  
13  
14  
15  
16  
17  
18  
19  
20  
21  
22  
23  
24  
25  
26  
27  
28  
29  
30  
31  
32  
33  
34  
35  
36  
37  
38  
39  
40  
41  
42  
43  
44  
45  
46  
47  
48  
49  
50  
51  
52  
53  
54  
55  
56  
57  
58  
59  
60

1  
2  
3  
4  
5  
6  
7  
8  
9  
10  
11  
12  
13  
14  
15  
16  
17  
18  
19  
20  
21  
22  
23  
24  
25  
26  
27  
28  
29  
30  
31  
32  
33  
34  
35  
36  
37  
38  
39  
40  
41  
42  
43  
44  
45  
46  
47  
48  
49

Figure 2: Effect of red blood cell transfusion versus no red blood cell transfusion on mortality (adjusted results)

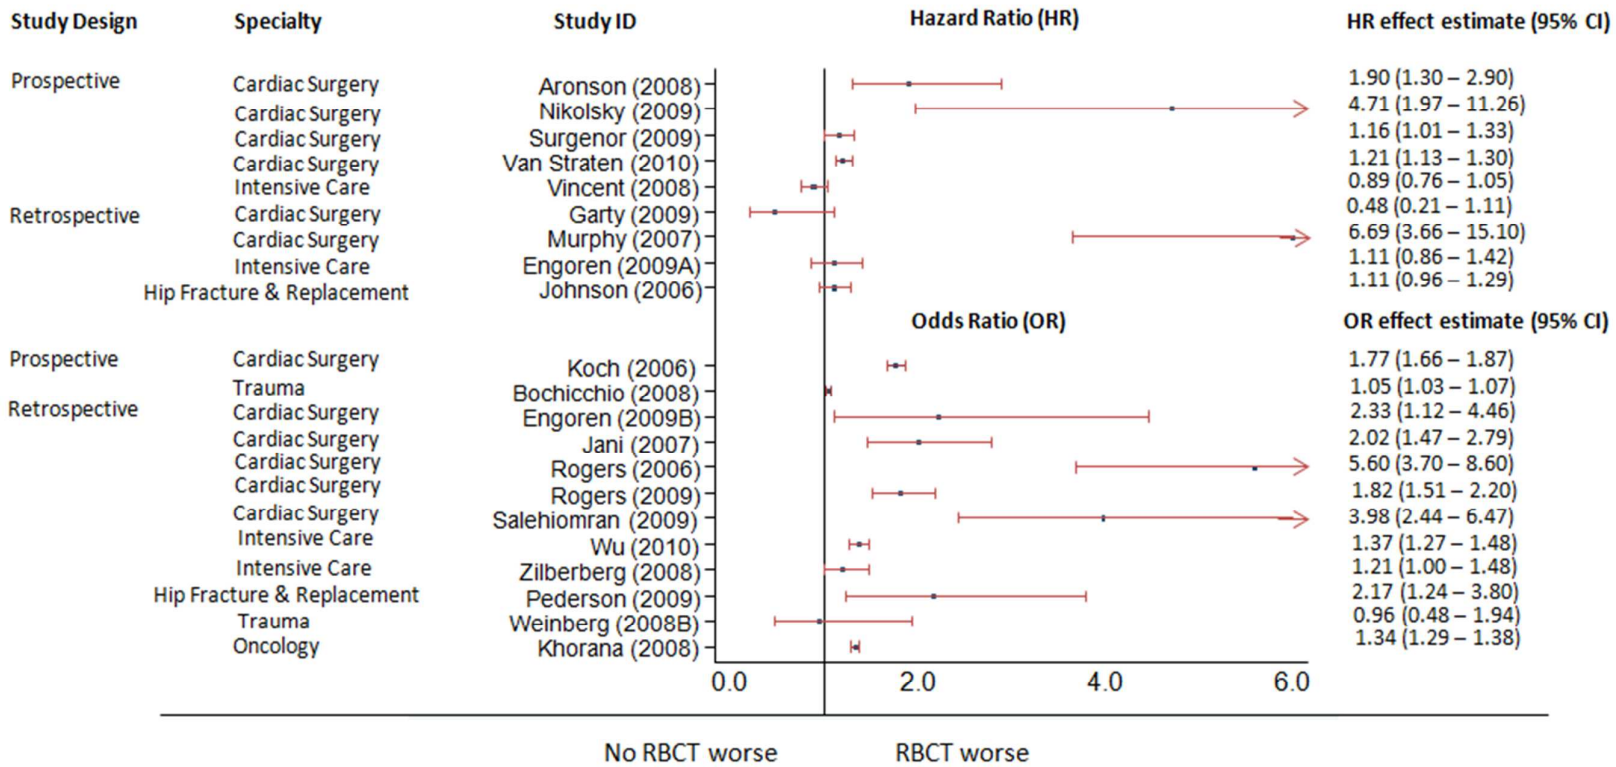



**Table 1: Summary of characteristics of included studies**

| Type of comparison               | RBC vs. no RBC<br>(n=23) | Volume 'A' vs. Volume<br>'B'(n=5) | Old RBC vs. new RBC<br>(n=4) |
|----------------------------------|--------------------------|-----------------------------------|------------------------------|
| <b>Design</b>                    |                          |                                   |                              |
| Prospective                      | 8 (35%)                  | 1 (20%)                           |                              |
| Retrospective                    | 15 (65%)                 | 4 (80%)                           | 4 (100%)                     |
| <b>Country</b>                   |                          |                                   |                              |
| Australia                        |                          | 1 (20%)                           |                              |
| Belgium                          | 1 (4%)                   |                                   |                              |
| Denmark                          | 1 (4%)                   |                                   |                              |
| Germany                          |                          | 1 (20%)                           |                              |
| Iran                             | 1 (4%)                   |                                   |                              |
| Israel                           | 2 (9%)                   |                                   |                              |
| Netherlands                      | 1 (4%)                   |                                   | 1 (25%)                      |
| Sweden                           |                          |                                   | 1 (25%)                      |
| USA                              | 14 (61%)                 | 3 (60%)                           | 2 (50%)                      |
| UK                               | 2 (9%)                   |                                   |                              |
| (multiple sites)                 | 1 (4%)                   |                                   |                              |
| <b>Time period assessed</b>      |                          |                                   |                              |
|                                  | 1989-2008                | 1993-2007                         | 1993-2007                    |
| <b>Sample size (median, IQR)</b> |                          |                                   |                              |
| All patients                     | 4344 (IQR 2085-11963)    | 8215 (IQR 3037-8799)              | 4358 (2264-185019)           |
| RBC transfusion                  | 1068 (IQR 430-5812)      |                                   |                              |
| No RBC transfusion               | 2325 (IQR 1636-6151)     |                                   |                              |
| <b>Disease area</b>              |                          |                                   |                              |
| Cardiac surgery                  | 12 (52%)                 | 2 (40%)                           | 2 (50%)                      |
| Hip fracture/replacement         | 2 (9%)                   |                                   |                              |
| Intensive care                   | 5 (22%)                  | 1 (20%)                           |                              |
| Oncology                         | 1 (4%)                   |                                   |                              |
| Surgery                          |                          | 1 (20%)                           |                              |
| Trauma adults                    | 2 (9%)                   | 1 (20%)                           | 1 (25%)                      |
| Trauma paediatrics               | 1 (4%)                   |                                   |                              |
| Not reported                     |                          |                                   | 1 (25%)                      |
| <b>Prescribing guidance</b>      |                          |                                   |                              |
| Reported                         | 7 (30%)                  | 3 (60%)                           |                              |
| Not reported                     | 16 (70%)                 | 2 (40%)                           | 4 (100%)                     |
| <b>Mortality assessed*</b>       |                          |                                   |                              |
| In hospital                      | 8                        | 2                                 | 2                            |
| 30 days                          | 10                       | 2                                 | 1                            |
| 3 months                         | 3                        |                                   |                              |
| 6 months                         | 3                        |                                   |                              |
| >1 year                          | 4                        | 1                                 | 2                            |
| Time period not specified        | 2                        |                                   | 1                            |

\*studies reported mortality for >1 time point based on binary only and / or time-to-event outcome

Table 2: Method of adjusted analysis

| Type of comparison                              | RBCT vs. no RBCT<br>(n=23) | Volume 'A' vs. Volume 'B'<br>(n=5) | Old RBC vs. new RBC<br>(n=4) |
|-------------------------------------------------|----------------------------|------------------------------------|------------------------------|
| Choice of covariates                            |                            |                                    |                              |
| Pre-specified                                   | 13 (57%)                   | 5 (100%)                           | 4 (100%)                     |
| Post hoc                                        |                            |                                    |                              |
| Unclear                                         | 10 (43%)                   |                                    |                              |
| No. of covariates measured                      |                            |                                    |                              |
| 1-5                                             | 2 (9%)                     |                                    |                              |
| 6-10                                            | 4 (17%)                    | 1 (20%)                            | 2 (50%)                      |
| 11-20                                           | 3 (13%)                    | 2 (40%)                            |                              |
| >20                                             | 12 (52%)                   | 2 (40%)                            | 1 (25%)                      |
| Unclear                                         | 2 (9%)                     |                                    | 1 (25%)                      |
| Important covariates assessed                   |                            |                                    |                              |
| Age                                             | 23 (100%)                  | 5 (100%)                           | 4 (100%)                     |
| Sex                                             | 23 (100%)                  | 5 (100%)                           | 4 (100%)                     |
| Smoking                                         | 8 (35%)                    | 1 (20%)                            | 1 (25%)                      |
| Co-morbidity                                    | 21 (91%)                   | 5 (100%)                           | 3 (75%)                      |
| Hb level                                        | 14 (61%)                   | 4 (80%)                            | 2 (50%)                      |
| Important covariates incorporated into analysis |                            |                                    |                              |
| Yes                                             | 8 (35%)                    | 1 (20%)                            | 1 (25%)                      |
| No                                              | 15 (65%)                   | 4 (80%)                            | 3 (75%)                      |
| Method of adjustment                            |                            |                                    |                              |
| Cox proportional hazard                         | 6 (26%)                    | 1 (20%)                            | 1 (25%)                      |
| Logistic regression                             | 14 (61%)                   | 4 (80%)                            | 2 (50%)                      |
| Both *                                          | 3 (13%)                    |                                    |                              |
| Not reported                                    |                            |                                    | 1 (25%)                      |

\*studies reported >1 method of adjustment when mortality was assessed for >1 time point

**Table 3: Presentation of results for unadjusted and adjusted analysis (mortality)**

| Type of comparison                      | RBCT vs. no RBCT<br>(n=23) | Volume 'A' vs. Volume 'B'<br>(n=5) | Old RBC vs. new RBC<br>(n=4) |
|-----------------------------------------|----------------------------|------------------------------------|------------------------------|
| Summary statistic for each group        |                            |                                    |                              |
| Unadjusted only                         | 5 (22%)                    | 2 (40%)                            |                              |
| Adjusted only                           | 1 (4%)                     |                                    |                              |
| Both                                    | 7 (30%)                    |                                    | 1 (25%)                      |
| Not reported                            | 10 (44%)                   | 3 (60%)                            | 3 (75%)                      |
| Treatment effect                        |                            |                                    |                              |
| Unadjusted only                         | 1 (4%)                     |                                    |                              |
| Adjusted only                           | 12 (52%)                   | 5 (100%)                           | 2 (50%)                      |
| Both                                    | 8 (35%)                    |                                    | 1 (25%)                      |
| Not reported                            | 2 (9%)                     |                                    | 1 (25%)                      |
| Confidence interval of treatment effect |                            |                                    |                              |
| Unadjusted only                         |                            |                                    |                              |
| Adjusted only                           | 10 (43%)                   | 3 (60%)                            | 2 (50%)                      |
| Both                                    | 8 (35%)                    |                                    | 1 (25%)                      |
| Not reported                            | 5 (22%)                    | 2 (40%)                            | 1 (25%)                      |
| P-value for treatment effect            |                            |                                    |                              |
| Unadjusted only                         | 7 (30%)                    |                                    |                              |
| Adjusted only                           |                            | 1 (20%)                            |                              |
| Both                                    | 1 (4%)                     |                                    | 1 (25%)                      |
| Not reported                            | 15 (66%)                   | 4 (80%)                            | 3 (75%)                      |
| Unadjusted analysis*                    |                            |                                    |                              |
| Statistically significant               | 17 (74%)                   |                                    | 2 (50%)                      |
| Statistically non-significant           | 1 (4%)                     |                                    |                              |
| Not reported                            | 5 (22%)                    | 5 (100%)                           | 2 (50%)                      |
| Adjusted analysis*                      |                            |                                    |                              |
| Statistically significant               | 15 (65%)                   | 2 (40%)                            | 1 (25%)                      |
| Statistically non-significant           | 7 (31%)                    | 2 (40%)                            | 3 (75%)                      |
| Not reported                            | 1 (4%)                     | 1 (20%)                            |                              |

\*mortality outcome – if >1 time point analysed the time point with the non-significant result was recorded

Table 4: Assessment of methodological quality of the included studies

| Study ID                  | Data collected prospectively | Sample representative | Important covariates measured | Important covariates incorporated into analysis | Method of dealing with confounding adequate* |
|---------------------------|------------------------------|-----------------------|-------------------------------|-------------------------------------------------|----------------------------------------------|
| Aronson 2008 (3)          | Yes                          | Unclear               | Yes                           | Yes                                             | Yes                                          |
| Bernard 2009 (27)         | No                           | Yes                   | Yes                           | Yes                                             | Yes                                          |
| Bochicchio 2008 (4)       | Yes                          | Yes                   | No                            | No                                              | No                                           |
| Charles 2007 (28)         | No                           | Yes                   | No                            | No                                              | No                                           |
| Edgren 2010 (32)          | No                           | Yes                   | No                            | No                                              | No                                           |
| Engoren 2009 (5)          | No                           | Yes                   | No                            | No                                              | No                                           |
| Engoren 2009 (6)          | No                           | Yes                   | No                            | No                                              | No                                           |
| Garty 2009 (7)            | No                           | Yes                   | Yes                           | Yes                                             | Yes                                          |
| Jani 2007 (8)             | No                           | No (>60 years)        | Yes                           | Yes                                             | Yes                                          |
| Johnson 2006 (9)          | No                           | Unclear               | No                            | No                                              | No                                           |
| Khorana 2008 (10)         | No                           | Yes                   | No                            | No                                              | No                                           |
| Koch 2006 (11,12)         | Yes                          | Yes                   | Yes                           | Yes                                             | Yes                                          |
| Koch 2008 (33)            | No                           | Yes                   | Yes                           | Yes                                             | Yes                                          |
| Murphy 2007 (13)          | No                           | Yes                   | Yes                           | Yes                                             | Yes                                          |
| Nikolsky 2009 (14)        | Yes                          | Yes                   | Yes                           | Yes                                             | Yes                                          |
| O'Keefe 2010 (29)         | Yes                          | Yes                   | No                            | No                                              | No                                           |
| Pederson 2009 (15)        | No                           | Yes                   | No                            | No                                              | No                                           |
| Rogers 2006 (16)          | No                           | No (>65 years)        | No                            | No                                              | No                                           |
| Rogers 2009 (17)          | No                           | No (> 65 years)       | No                            | No                                              | No                                           |
| Ruttinger 2007 (30)       | No                           | Yes                   | No                            | No                                              | No                                           |
| Salehiomran 2009 (18)     | No                           | Yes                   | Yes                           | Yes                                             | Yes                                          |
| Stone 2008 (19)           | No                           | No (< 16 years))      | No                            | No                                              | No                                           |
| Surgenor 2009 (20)        | Yes                          | Yes                   | No                            | No                                              | No                                           |
| Taylor 2006 (21)          | Yes                          | Yes                   | No                            | No                                              | No                                           |
| van de Watering 2006 (34) | No                           | Yes                   | No                            | No                                              | No                                           |
| van Straten 2010 (22)     | Yes                          | Yes                   | No                            | No                                              | No                                           |
| Vincent 2008 (23)         | Yes                          | Yes                   | No                            | No                                              | No                                           |
| Weightman 2009 (31)       | Yes                          | Yes                   | No                            | No                                              | No                                           |
| Weinburg 2008 (24)        | No                           | Yes                   | No                            | No                                              | No                                           |
| Weinburg 2008 (35)        | No                           | Yes                   | No                            | No                                              | No                                           |

|                         |    |                    |     |     |     |
|-------------------------|----|--------------------|-----|-----|-----|
|                         |    |                    |     |     |     |
| Wu 2010 (25)            | No | No<br>(> 65 years) | Yes | Yes | Yes |
| Zilberberg 2008<br>(26) | No | Yes                | No  | No  | No  |

\*The method of dealing with confounding was deemed adequate if important covariates were measured and adjusted for in the analysis.

For peer review only

1  
2  
3  
4  
5  
6  
7  
8 **Time to act on evidence from recent A systematic review of the effect**  
9  
10 **of red blood cell transfusion on mortality: evidence from large scale**  
11 **observational studies published between 2006 and 2010 of the clinical**  
12 **outcomes efficacy of red blood cell transfusions? Insights from a**  
13 **systematic review**  
14  
15  
16  
17  
18  
19  
20  
21  
22  
23  
24  
25

26 Sally Hopewell<sup>1,2</sup>, Omar Omar<sup>2</sup>, Chris Hyde<sup>3</sup>, Ly-Mee Yu<sup>2</sup>, Carolyn Doree<sup>1</sup>, Mike F. Murphy<sup>1</sup>  
27  
28  
29

- 30  
31  
32  
33  
34  
35  
36  
37  
38  
39  
40
1. Systematic Review Initiative, NHS Blood and Transplant, Department of Haematology, Oxford University Hospitals and University of Oxford, UK.
  2. Centre for Statistics in Medicine, University of Oxford, Oxford, UK
  3. PenTAG, Peninsula College of Medicine and Dentistry, Exeter, UK

41 Correspondence to:

42  
43 Dr Sally Hopewell, Centre for Statistics in Medicine, University of Oxford, Wolfson College,  
44 Linton Road, Oxford, OX2 6UD, UK. Tel: +44 1865 284400; Fax: +44 1865 284424; Email:

45  
46 [sally.hopewell@csm.ox.ac.uk](mailto:sally.hopewell@csm.ox.ac.uk)  
47

48  
49 **Keywords**

50 Systematic review, observational studies, transfusion, mortality.  
51

52  
53 Word count 4324  
54  
55  
56  
57  
58  
59  
60

## ABSTRACT

**Objective:** To carry out a systematic review of recently published large scale observational studies assessing the effect of red blood cell transfusion (RBCT) on mortality the efficacy clinical outcomes of red blood cell transfusion (RBCT), with particular emphasis on the statistical methods used to adjust for confounding. Given the limited number of randomized trials of the efficacy of RBCT, clinicians often use evidence from observational studies. However, confounding factors, for example individuals receiving blood generally being sicker than those who do not, makes their interpretation challenging.

**Design:** Systematic review.

**Information sources:** We searched MEDLINE and EMBASE for studies published from 1 January 2006 to 31 December 2010.

**Eligibility criteria for included studies:** We included prospective cohort, case control studies or retrospective analyses of databases or disease registers where the effect of risk factors for mortality or survival was examined. Studies must have included more than 1000 participants receiving RBCT for any cause. We assessed the effects of RBCT versus no RBCT and different volumes and age of RBCT.

**Results:** Thirty two studies were included in the review; 23 assessed the effects of RBCT versus no RBCT; five assessed different volumes and four older versus newer RBCT. There was considerable variability in the patient populations, study designs and level of statistical adjustment. Overall, most studies showed a higher rate of mortality when comparing patients who received RBCT with those who did not, even when these rates were adjusted for confounding; the majority of these increases were statistically significant. The same pattern was observed in studies where protection from bias was likely to be greater, such as prospective studies.

**Conclusion:** Recent observational studies do show a consistent adverse effect of RBCT on mortality. Whether this is a true effect remains uncertain as it is possible that even the best

1  
2  
3  
4  
5  
6  
7  
8  
9  
10  
11  
12  
13  
14  
15  
16  
17  
18  
19  
20  
21  
22  
23  
24  
25  
26  
27  
28  
29  
30  
31  
32  
33  
34  
35  
36  
37  
38  
39  
40  
41  
42  
43  
44  
45  
46  
47  
48  
49  
50  
51  
52  
53  
54  
55  
56  
57  
58  
59  
60

~~conducted adjustments cannot completely eliminate the impact of confounding, and should be addressed by conducting further well designed and powered clinical studies, and where possible well designed and powered randomized controlled trials.~~

For peer review only



## ARTICLE SUMMARY

## Article focus

- Given the limited number of randomized trials of the efficacy of red blood cell transfusion (RBCT), clinicians often use evidence from observational studies.
- Confounding factors, for example individuals receiving blood generally being sicker than those who do not, can make their interpretation challenging.
- Our objective was to systematically review ~~recent~~ large observational studies (n>1000 patients) published in the last five years ~~-assessing~~ the ~~effect~~ efficacy of RBCT on mortality, with particular emphasis on the statistical methods used to adjust for confounding.

## Key messages

- We identified considerable variability in the patient populations, study designs and level of statistical adjustment.
- Most studies showed higher mortality rates when comparing patients who received RBCT with those who did not, even when adjusting for confounding. We identified similar patterns in studies where protection from bias was likely to be greatest.

## Strengths and limitations of this study

- Overall, observational studies do show a consistent adverse effect of RBCT on mortality.
- However, even the best conducted adjustments for confounding cannot completely eliminate its impact, particularly when investigating the effect of RBCT on mortality.

## Introduction

Randomized controlled trials are considered the gold standard with which to evaluate the efficacy of a particular health care intervention. In 2005, Blajchman (1) published a study that explored the impact that ten landmark randomized controlled trials have had on the practice of transfusion medicine. The use of randomized trials to evaluate transfusion medicine has only been established since the 1980s (1). Given the limited number of high quality randomized trials of the efficacy of blood transfusion and the challenges of conducting new trials, clinicians often rely on evidence from observational studies. In a randomized trial patients are allocated to comparison groups at random, so the level of disease is likely to be similar in each group and differences in disease severity unlikely to be the explanation for any differences in outcome seen. In an observational study, ~~whether a treatment is received or not is likely to be heavily influenced by perceived need by the treating doctor and this will be particularly true where the outcomes of transfused patients are being compared with those not transfused. In this case~~ the groups of patients being compared are not likely to be comparable and the differences in prognostic factors may of themselves lead to difference in outcome. The impact of such "confounding" can be reduced by adjustment in the statistical analysis, but the success of this is dependent on the technique used, complete identification of the factors which might influence outcome and their accurate measurement in the patients in the study (2). As all the factors influencing outcome may never be known, adjustment is unlikely to ever completely account for the confounding occurring in observational studies. The unknown inter-dependence of multiple factors is also a major challenge.

~~The impact that the contribution of data from observational studies has made to the practice of transfusion medicine has not been systematically explored. There is increasing implementation of restrictive policies for transfusion, and evidence of reduction in blood use~~

1  
2  
3 in several countries such as the United Kingdom (UK) and the United States of America (USA)  
4 with no evidence of poorer clinical outcomes(3;4). However, there remains considerable  
5 variation between hospitals in blood reduction in the UK (5) and elsewhere (6) suggesting  
6 that overall blood usage could be further reduced without compromising patient safety.  
7  
8 However, Observational studies may have influenced these changes in transfusion practice  
9 along with evidence from randomized controlled trials, national guidelines, and process  
10 driven initiatives, but the impact that the contribution of data from observational studies  
11 has made to the practice of transfusion medicine has not been systematically explored.  
12 given their publication in major journals, their impact on clinicians may be greater than is  
13 appropriate for the types of studies and the limitations associated with their design. The  
14 aims of this systematic review were therefore to identify recently published (2006 to 2010),  
15 large scale observational studies assessing the effectsiveness of red blood cell transfusion  
16 (RBCT) on mortality. In particular ,we aimed to critique them with particular emphasis on the  
17 statistical methods, and the assumptions made in the analyses of the observational data,  
18 and to consider the validity of these data as an evidence base for the practice of transfusion  
19 medicine and to inform future research in this field.

## Methods

### Criteria for selecting studies

#### Type of participants

We included both adults and children receiving RBCT for any cause. We also included studies which stated that patients received red blood cells and other blood products. When reported by the primary studies we assessed the effects of RBCT separately from other blood products.

#### Type of intervention and comparator

We included the following risk factors:

- RBCT versus no RBCT
- Volume 'A' of RBCT versus volume 'B' of RBCT (as defined by the primary studies)
- 'Older' RBCT versus 'newer' RBCT (as defined by the primary studies)

#### Type of outcome measure

Our primary outcome measure was death, mortality or survival measured at any time point.

#### Type of studies

We included prospective cohort, case control studies or retrospective analyses of databases or disease registers where the effect of the above risk factors on death, mortality or survival is examined. Studies must have included more than 1000 participants. This was a pragmatic limit designed to focus attention on studies most likely to have had an impact and least likely to have been affected by chance.

#### **Search strategy**

We carried out a comprehensive search ([21 January 2011](#)) of MEDLINE and EMBASE for studies published from 1 January 2006 to 31 December 2010 using the strategies in Appendix 1. [Again we chose to use a pragmatic approach and limited our search to studies published in the last five years.](#) We [also](#) excluded conference abstracts unless they had subsequently been published as full articles.

#### **Data collection and analysis**

One review author (CD) initially screened all search results for relevance against the eligibility criteria and discarded all those that were clearly irrelevant. Thereafter, another author (SH) independently screened all remaining hits. We retrieved full text articles for all

1  
2  
3 those references where we are unable to decide on eligibility based on the title and abstract  
4  
5 alone. All full text articles were independently screened by two review authors (SH, MM) to  
6  
7 ensure that they met the eligibility criteria.  
8  
9

### 10 11 **Data extraction and management**

12  
13 Two review authors (SH, OO) independently extracted data from all included studies. Any  
14  
15 disagreements were resolved by discussion or by consulting a third author if there was still  
16  
17 uncertainty. We extracted data on the following study characteristics: the study design, how  
18  
19 patients were recruited, the country where the study was conducted, the source of funding,  
20  
21 the type of participants, their age, disease area, setting, the type of intervention /  
22  
23 comparator and nature of the exposure, the number of participants in each group, whether  
24  
25 any formal prescribing guidance was reported, the type of outcome measure (i.e. mortality)  
26  
27 and the time point at which it was measured.  
28  
29

30  
31  
32  
33 We also extracted information on the statistical methods used to adjust for differences  
34  
35 between study groups, in particular the number of study covariates measured, whether  
36  
37 important covariates relating to red cell transfusion were assessed (i.e. age, sex, co-  
38  
39 morbidity, hemoglobin) and whether these were incorporated into the analysis, whether the  
40  
41 choice of covariates were pre-specified or data driven and the statistical model used for the  
42  
43 statistical adjustment. We also assessed the effects of smoking as a study covariate in  
44  
45 relation to blood transfusion and its effect on mortality. In terms of the study results we  
46  
47 extracted data on the presentation of both the unadjusted and adjusted result for the effect  
48  
49 of red cell transfusion on mortality as reported by each study. If not reported by the primary  
50  
51 study we calculated (where there were sufficient data) the odds ratio for the effect of blood  
52  
53 transfusion on mortality for unadjusted analyses using STATA (version 11). We assessed, for  
54  
55 the unadjusted and adjusted result, whether the study reported summary statistics for each  
56  
57  
58  
59  
60

1  
2  
3 comparison group, the treatment effect, confidence interval, p value and whether the result  
4  
5 was statistically significant. If a study reported more than one adjusted analysis we selected  
6  
7 in order of preference (i) the main adjusted analysis mentioned in the abstract, (ii) the main  
8  
9 adjusted analysis mentioned in the conclusions, (iii) the main adjusted analysis mentioned in  
10  
11 the results section. If mortality was assessed for more than one time point (i.e. at 30 days  
12  
13 and 1 year) then we used the shorter time point in our analysis.  
14  
15

### 16 17 18 **Assessment of methodological quality**

19  
20 We also assessed whether studies met important methodological criteria for the reporting  
21  
22 of observational studies<sup>(2)</sup>: whether the samples were representative of those to whom the  
23  
24 results might be generalised, whether important covariates in relation to RBCT and mortality  
25  
26 (e.g. sex, age, smoking, co-morbidity, hemoglobin level) were measured and incorporated  
27  
28 into the analysis, whether the method of dealing with confounding between patient groups  
29  
30 was adequate, whether a statistician was listed as an author of the study and whether the  
31  
32 data were collected prospectively following an agreed study design. We included smoking as  
33  
34 a covariate as, while not directly correlated with transfusion, it is considered important  
35  
36 when assessing mortality.  
37  
38  
39  
40  
41

### 42 **Method of analysis**

43  
44 We have presented the results separately for the three different types of comparisons.  
45  
46 Within each, due to the varied nature of the clinical conditions, study designs and level of  
47  
48 statistical adjustment, we decided a priori not to combine the results of individual studies in  
49  
50 a meta-analysis and instead present the results of the individual studies descriptively in the  
51  
52 text, tables and figures.  
53  
54

### 55 56 57 **Results**

1  
2  
3 Searches of MEDLINE and EMBASE identified 4318 possible records. 4272 did not meet the  
4 eligibility criteria for this study. Full articles were retrieved for 45 studies; 13 further studies  
5 were excluded as they did not fulfil our eligibility criteria (see [Appendix 2 for list of excluded](#)  
6 [studiesFigure 1](#)). Thirty two studies were included in the review; 23 (7-30) studies assessed  
7 the effects of RBCT versus no RBCT, five studies (31-35) assessed different volumes of RBCT  
8 and four (36-39) assessed giving older versus newer RBCT: [\(see Figure 1\)](#).  
9  
10  
11  
12  
13  
14  
15  
16  
17

### 18 **Red blood cell transfusion versus no red blood cell transfusion**

19  
20 Twenty three studies (7-30) assessed the effects of RBCT versus no RBCT on mortality. Four  
21 of these studies (8;12;14;21) included both red cell transfusion and other blood products  
22 (e.g. platelets, plasma, cryoprecipitate); for one study, data were available separately for  
23 RBCT and mortality (14). For three studies it was unclear if other blood products were  
24 transfused along with red blood cells (11;13;22).  
25  
26  
27  
28  
29  
30  
31  
32

#### 33 *Study characteristics (Table 1)*

34  
35 Eight studies were prospective cohort studies following up a planned group of patients  
36 (7;8;15;16;18;24-27), the other 15 studies assessed data from a retrospective patient  
37 registry or database. Fourteen studies were conducted in the USA, two in the UK, two in  
38 Israel and the remainder in Belgium, the Netherlands, Iran and Denmark; one study was  
39 conducted in multiple countries. The time period assessed was between 1989 and 2008.  
40  
41 Twelve of the studies (7;9;11;12;15-18;20-22;24;26) specifically looked at adults undergoing  
42 cardiac surgery, five were in patients in the intensive care unit (10;25;27;29;30), two were in  
43 adults trauma patients (8;28), two were in patients following hip fracture/replacement  
44 (13;19) one was in oncology patients (14) and the other in pediatric trauma patients (23).  
45  
46 Three of the studies (12;20;21) specifically looked at the effects of RBCT in older adults (e.g.  
47 > 60 years). The size of the studies varied from 1,624 participants to 504,208 participants  
48  
49  
50  
51  
52  
53  
54  
55  
56  
57  
58  
59  
60

1  
2  
3 with an overall median sample size of 4344 (IQR 2085 to 11963); median 1068 (IQR 430 to  
4  
5 5812) for patients undergoing RBCT compared to median 2325 (IQR 1636 to 6151) for  
6  
7 patient with no RBCT. The time period at which mortality was assessed also varied across  
8  
9 studies from in-hospital to mortality at seven years; the most common time point being  
10  
11 mortality at or within 30 days. Several studies reported mortality for more than one time  
12  
13 period. Only seven of the 23 studies provided any mention of guidelines for the prescription  
14  
15 of RBCT; two studies said no formal protocol was used (8;23), two studies stated a  
16  
17 hemoglobin of <8g/dl (10;13), one study stated a hematocrit of less than 25-26% (22) and  
18  
19 two studies said prescription was at the discretion of the patient care team (24;25). For full  
20  
21 details of the characteristics of the included studies see Appendix [32](#).

#### 22 23 24 25 26 27 *Statistical methods (Table 2)*

28  
29 All 23 studies provided information on the statistical methods used to adjust for differences  
30  
31 in the baseline characteristics of patients who received RBCT and those who did not.  
32  
33 However, the amount of detail and appropriateness of the method used varied across  
34  
35 studies. In 13 studies (7;9;10;14-19;22;24;25;27;30) the choices of covariates measured  
36  
37 were reported as pre-specified and not data driven, but this was unclear for the remaining  
38  
39 10 studies. The number of covariates measured and incorporated in the analysis also varied  
40  
41 across studies with half the studies reported to assess more than 20 different covariates.  
42  
43 Despite the high number of covariates assessed in these studies, not all measured covariates  
44  
45 which appeared to be of specific importance in relation to RBCT. All of the 23 studies did  
46  
47 report measuring the age and sex of the patients and 21 reported measuring patient co-  
48  
49 morbidity. Overall, only eight (7;11;12;15-18;22;29) studies measured and incorporated the  
50  
51 covariates age, sex, smoking, co-morbidity and haemoglobin level into the adjusted analysis..  
52  
53 Fourteen of the 23 studies reported using logistic regression (i.e. mortality was reported as a  
54  
55 binary outcome) as the method of adjusting for differences in the baseline characteristics  
56  
57  
58  
59  
60



1  
2  
3 between the two patients groups; six studies reported using Cox proportional hazard (i.e.  
4 mortality was reported as a time to event outcome) and three studies reporting using both  
5 methods; in these three studies mortality was assessed for more than one time period. Nine  
6 studies (7;12;17-19;21;27;29) reported using propensity scores prior to adjusting for  
7 confounders, however, sometimes this matching was only using a much smaller subgroup of  
8 patients. For full details of the statistical methods see Appendix 43.  
9  
10  
11  
12  
13  
14  
15  
16  
17

### 18 *Presentation of adjusted and unadjusted results (Table 3)*

19  
20 There were marked differences in the presentation and reporting of the unadjusted and  
21 adjusted results when comparing the effects of RBCT versus no RBCT on mortality. Seven of  
22 the 23 studies reported a summary statistic for each group for both the unadjusted and  
23 adjusted analysis. Five studies reported a summary statistics for only the unadjusted analysis  
24 and one study for the adjusted analysis only; no summary statistic comparing the effects of  
25 RBCT versus no RBCT on mortality was reported in the remained 10 studies. Eight studies  
26 reported the treatment effect (e.g. odds ratio, risk ratio, hazard ratio) and the corresponding  
27 confident interval (six studies) for both the unadjusted and adjusted analysis (7;15;16;18-  
28 20;24;26;30), whereas 12 studies reported the treatment effect and confident interval (10  
29 studies) for adjusted analysis only and one study for the unadjusted analysis only. Where  
30 possible we calculated the odds ratio for the effect of RBCT on mortality for unadjusted  
31 analyses if it was not reported in the published article.  
32  
33  
34  
35  
36  
37  
38  
39  
40  
41  
42  
43  
44  
45  
46  
47

48 Seventeen of the 23 studies reported a statistically significant result for the unadjusted  
49 analysis, and 15 for the adjusted analysis (Figure 2), when comparing the effect of RBCT  
50 versus no RBCT on mortality, with more deaths occurring in patients receiving transfusion.  
51 This effect was statistically non-significant in seven studies based on the result of the  
52 adjusted analysis. Prospective studies were more likely to show a statistically significant  
53  
54  
55  
56  
57  
58  
59  
60

1  
2  
3 effect for blood transfusion on mortality compared to retrospective studies for both the  
4  
5 unadjusted and adjusted analysis. For full details see Appendix [54](#).  
6  
7

### 8 9 **Volume 'A' red blood versus volume 'B' red blood cells**

10  
11 Five studies (31-35) assessed the effect of different volumes of RBCT on mortality. One of  
12  
13 these studies (35) included both RBCT and other blood products.  
14  
15

#### 16 17 *Study characteristics (Table 1)*

18  
19 One study assessed a prospective cohort and followed up a planned group of patients (35),  
20  
21 the other four studies assessed data from a retrospective patient registry or database. Two  
22  
23 of the studies (33;35) specifically looked at adults undergoing cardiac surgery, one was in  
24  
25 trauma patients (32), one was in patients undergoing major surgery (31) and one in patients  
26  
27 in the intensive care unit (34). The size of the studies varied from 1,841 participants to  
28  
29 125,177 participants, with an overall median sample size of 8215 (IQR 3037 to 8799). The  
30  
31 volume of RBCT varied considerably across studies from 1-2 units to more than eight units.  
32  
33 The time period at which mortality was assessed also varied across studies from in-hospital  
34  
35 to mortality at eight years. Three of the five studies provided any mention of guidelines for  
36  
37 the prescription of red blood cells, however only one gave any specific requirement stating a  
38  
39 hemoglobin of <8g/dl (34) (See Appendix [32](#)).  
40  
41  
42  
43  
44  
45

#### 46 47 *Statistical methods (Table 2)*

48  
49 All five studies provided information on the statistical methods used to adjust for differences  
50  
51 in the baseline characteristics of patients who received different volumes of red blood  
52  
53 transfusion, however, as with the studies of RBCT versus no RBCT, the amount of detail and  
54  
55 appropriateness of the method used varied across studies. In all five studies (31-35) the  
56  
57 choices of covariates measured were reported as pre-specified. The number of covariates  
58  
59  
60

1  
2  
3 measured and incorporated in the analysis varied across studies with two the studies  
4 reported to assess more than 20 different covariates. Once again, despite the high number  
5 of covariates assessed in these studies, not all measured covariates seem to be of specific  
6 importance in relation to RBCT. All five studies reported measuring age and sex and patient  
7 co-morbidity, however, one (31) measured and incorporated the covariates age, sex,  
8 smoking, co-morbidity and hemoglobin level into the adjusted analysis.  
9  
10  
11  
12  
13  
14  
15  
16  
17

### 18 *Presentation of adjusted and unadjusted results (Table 3)*

19  
20 As with the studies of RBCT versus no RBCT, there were marked difference in the  
21 presentation and reporting of the unadjusted and adjusted results when comparing the  
22 effects of different volumes of RBCT on mortality. Two studies reported a statistically  
23 significant result for the adjusted analysis with more deaths occurring in patients receiving  
24 larger volumes of RBCT. This effect was statistically non significant in two studies based on  
25 the result for adjusted analysis and was not reported for the remaining one study. No  
26 studies reported on the statistical significance of the result of the unadjusted analysis (See  
27 Appendix [43](#) and [54](#)).  
28  
29  
30  
31  
32  
33  
34  
35  
36  
37  
38  
39

### 40 **'Older' red blood cells versus 'newer' red blood cells**

41 Four (36-39) studies assessed the effects of age of RBCT on mortality, one of which  
42 specifically looked at leukodepleted RBCT (39).  
43  
44  
45  
46  
47

### 48 *Study characteristics (Table 1)*

49  
50 All four studies assessed data from a retrospective patient registry or database. Two of the  
51 studies (37;38) specifically looked at adults undergoing cardiac surgery, one was in trauma  
52 patients (39), while the other did not mention a specific patient group. The size of the  
53 studies varied from 1,813 participants to 364,037 participants, with an overall median  
54  
55  
56  
57  
58  
59  
60

1  
2  
3 sample size of 4358 (IQR 2264 to 185019). The period of time in which the blood was stored  
4  
5 varied considerably across studies. Two studies (37;39) assessed RBCT stored for less than 14  
6  
7 days compared to those stored for more than 14 days, one study (38) compared blood  
8  
9 stored for less than 18 days and with blood stored for more than 18 days and one study (36)  
10  
11 looked at multiple storage periods ranging from 1 to 42 days. None of the studies provided  
12  
13 any mention of guidelines for the prescription of red blood cells (See Appendix 2).  
14  
15

#### 16 17 18 *Statistical methods (Table 2)*

19  
20 All four studies provided information on the statistical methods used to adjust for  
21  
22 differences in the baseline characteristics of patients who received RBCT stored for different  
23  
24 time periods, however, once again the amount of detail and appropriateness of the method  
25  
26 used varied across studies. The number of covariates measured and incorporated in the  
27  
28 analysis also varied across studies. All of the four studies reported measuring the age and  
29  
30 sex of the participants. Only ~~one study reported measuring smoking status,~~ two studies  
31  
32 reported measuring patient hemoglobin levels and three studies reported assessing patient  
33  
34 co-morbidities. Only one (37) of the four studies measured and incorporated the covariates  
35  
36 age, sex, smoking, co-morbidity and haemoglobin level into the adjusted analysis.  
37  
38  
39

#### 40 41 42 *Presentation of adjusted and unadjusted results (Table 3)*

43  
44 As with the studies of RBCT versus no RBCT and of volume 'A' red blood cells versus volume  
45  
46 'B' RBCT, there were marked differences in the presentation and reporting of the unadjusted  
47  
48 and adjusted results when comparing the effects of RBCT stored for different time periods  
49  
50 on mortality. Two studies reported a statistically significant result for the unadjusted  
51  
52 analysis and one study reported a statistically significant result for the adjusted analysis. In  
53  
54 two of these three studies there were more deaths occurring in patients receiving older  
55  
56 blood and in one study there were more deaths in patients receiving newer blood. This  
57  
58  
59  
60

1  
2  
3 effect was statistically non significant in three studies based on the result for adjusted  
4  
5 analysis (See Appendix [43](#) and [54](#)).  
6  
7

#### 8 9 **Assessment of methodological quality (Table 4)**

10  
11 Overall the assessment of methodological quality varied across studies and by study group  
12  
13 with only 10 of the 32 included studies assessing a prospective cohort following up a  
14  
15 planned group of patients over time, the remaining two-third of the studies assessed data  
16  
17 from a retrospective patient registry or database. In most studies the sample of patients  
18  
19 included in the study was considered representative of those to whom the results might be  
20  
21 generalised. Four studies (12;20;21;29) specifically focussed on older adults (>60 years) and  
22  
23 one study (23) on children, so the findings from these studies should only be interpreted in  
24  
25 relation to these specific patient groups. The baseline characteristics of patients who  
26  
27 received RBCT compared to those patients who did not receive RBCT (or patients who  
28  
29 received different volumes or age of blood) were often very different and so we wanted to  
30  
31 assess whether studies had adjusted for these differences when carrying out their statistical  
32  
33 analysis. Only 10 studies measured and incorporated in the analysis covariates which we  
34  
35 deemed of specific importance in relation to RBCT (i.e. age, sex, smoking, co-morbidity and  
36  
37 haemoglobin level), thus we deemed the method of dealing with confounding between  
38  
39 patient groups as adequate in only 31% of studies. Critically however, when we restricted  
40  
41 our analysis of results to studies with adequate methods, the pattern of an increase in  
42  
43 mortality associated with RBCT remained unchanged.  
44  
45  
46  
47  
48  
49

#### 50 **Discussion**

##### 51 *Summary of main findings*

52  
53 We identified 32 observational studies of more than 1000 participants published between  
54  
55 2006 and 2010 assessing the effect of RBCT on mortality. Twenty three studies compared  
56  
57  
58  
59  
60

1  
2  
3 RBCT versus no RBCT, five compared different volumes and four compared different storage  
4  
5 times. Overall there was considerable variability in the characteristics of the observational  
6  
7 studies. However, the majority, of studies were retrospective designs assessing patients  
8  
9 from an existing patient register or database.  
10

11  
12  
13  
14 We also identified considerable variability in the statistical methods used to adjust for  
15  
16 differences in the baseline characteristics of patients who received RBCT and those who did  
17  
18 not. It was often unclear if the choice of covariates measured and used in the adjusted  
19  
20 analyses were pre-specified at the start of the study or were driven by the underlying data.  
21  
22 Perhaps most importantly, around half of the 32 studies did not measure and adjust for  
23  
24 covariates which we deemed of specific importance to blood transfusion. ~~for example,~~  
25  
26 ~~patient hemoglobin levels, age, sex and existing co-morbidities. Less than a third of studies~~  
27  
28 ~~assessed smoking which, while not directly correlated with transfusion, is an important~~  
29  
30 ~~covariate when assessing mortality.~~  
31  
32  
33  
34

35  
36 Overall, more studies found a higher rate of mortality in patients receiving RBCT compared  
37  
38 with those who did not, and this effect was seen in both the adjusted and unadjusted  
39  
40 results. In general, where measured equivalently within the same study, the unadjusted  
41  
42 estimate of risk was greater than the adjusted risk, emphasising that adverse prognostic  
43  
44 factors are more common in patients receiving RBCT and that adjusting for them leads to a  
45  
46 smaller estimate of risk. Considering the adjusted risks, although the size of the effect was  
47  
48 not consistent across all studies, the direction of the effect was. Most studies suggest an  
49  
50 increased risk of mortality associated with RBCT. Further, those studies which were designed  
51  
52 prospectively and which used better methods of adjusting for differences in the baseline  
53  
54 characteristics between groups were more likely to show an increase in the risk of mortality  
55  
56 compared to studies which were based on retrospective registries or databases, although,  
57  
58  
59  
60

1  
2  
3 again the size of the effect was not consistent across all studies. However, it is important to  
4  
5 remember that even with the best methods of adjustment it cannot completely eliminate  
6  
7 the impact of confounding (2), as the sicker the patients (thus an increased risk of mortality)  
8  
9 the more likely they are to have received RBCT.  
10

#### 11 12 13 14 *Comparison with other studies*

15  
16 We are aware of one other systematic review of observational studies looking at the effects  
17  
18 of RBCT on mortality, which focussed specifically on critically ill adults in intensive care units  
19  
20 and adult trauma and surgical patients (40). This systematic review by Marik and colleagues  
21  
22 included more studies (n=45) than our review as it did not restrict its inclusion criteria to  
23  
24 studies with >1000 patients; the median number of patients analysed was 687. They also  
25  
26 found that RBCT was associated with an increased risk of mortality based on a meta-analysis  
27  
28 of 12 studies (odds ratio 1.7; 95% CI 1.4 to 1.9). However there was considerable  
29  
30 heterogeneity in the meta-analysis, suggesting that it might not have been appropriate to  
31  
32 combine the results of the individual studies and supports our decision not to conduct a  
33  
34 meta-analysis.  
35  
36  
37  
38  
39

40 In an overview of evidence from randomized controlled trials Wilkinson and colleagues (41)  
41  
42 identified 142 trials in RBCT. The majority compared the effects of leucoreduced RBCT or  
43  
44 different transfusion triggers (n=71). However, they did identify 12 trials comparing the  
45  
46 effects of RBCT versus no transfusion, seven looking at different volumes of RBCT and 11  
47  
48 different ages of red blood cells. The size of the trials was very small (median 30 to 40  
49  
50 patients) and the overview did not specifically examine the effect of RBCT on mortality.  
51  
52 Currently, we are aware of at least 14 ongoing or recently completed randomized controlled  
53  
54 trials examining the effects of the age of RBCT on clinical outcomes including the ARIPI (Age  
55  
56 of Red blood cells In Premature Infants) (42) ABLE, (Age of Blood Evaluation trial in the  
57  
58 of Red blood cells In Premature Infants) (42) ABLE, (Age of Blood Evaluation trial in the  
59  
60

1  
2  
3 resuscitation of critically ill patients) (43), RECESS (REd CELL Storage duration Study) (44) and  
4  
5 INFORM (Effects of transfusing fresh versus standard-issue red cells on in-hospital mortality)  
6  
7 trials, for which mortality or survival is a specified outcome measure.  
8  
9

### 10 11 *Limitations*

12  
13 Our study has several limitations. Firstly, we only included studies published in the last five  
14  
15 years and which included more than 1,000 patients. This was because we took a pragmatic  
16  
17 approach as we hypothesised that more recent studies were more likely to use better  
18  
19 statistical methods and also hypothesised that studies with a larger sample size we are more  
20  
21 likely to show a truer effect of the intervention (45) ~~and that more recent studies are more~~  
22  
23 ~~likely to use better statistical methods.~~ Thus we aimed to provide a “snap shot” of current  
24  
25 practice rather provide a comprehensive review of all available evidence. It is possible  
26  
27 therefore that the overall effect seen here might be different in older studies and/or in  
28  
29 those carried out in smaller numbers of patients. Secondly, we decided not to combine the  
30  
31 results of individual studies because of the variability in clinical settings and study methods,  
32  
33 and instead presented the results of individual studies descriptively in the text and in tables  
34  
35 and figures. More formal statistical analysis might have given a more precise indication of  
36  
37 the overall effect of red cell transfusion on mortality, but would have ignored the significant  
38  
39 amount of clinical and methodological heterogeneity between studies which we identified a  
40  
41 priori and which was very apparent in the analysis done by Marik and colleagues (40).  
42  
43 However, in the absence of a more formal statistical analysis we have inevitably had to rely  
44  
45 on a vote-counting approach which also has great dangers, particularly the assumption that  
46  
47 each included study has equal weight. Our main protection against this is the very  
48  
49 pronounced nature of the pattern we have observed and the fact that we have limited our  
50  
51 conclusions to the direction of effect.  
52  
53  
54  
55  
56  
57  
58  
59  
60



1  
2  
3 Finally, we limited our inclusion criteria to published articles and excluded unpublished  
4 studies or those published only as conference abstracts; thus our study could be subject to  
5 publication bias, as studies which did not show a significant effect of red cell transfusion on  
6 mortality might be less likely to be published in full (46). Outcome reporting bias may also be  
7 a problem, although difficult to combat, in the case where a risk has been measured at  
8 different time points but only those time points which are “positive” are reported. However,  
9 in the case of both publication and outcome reporting bias, the extreme nature of the  
10 pattern makes it relatively implausible that there are sufficient unpublished studies or time  
11 points to reverse it.  
12  
13  
14  
15  
16  
17  
18  
19  
20  
21

#### [Implications for clinical practice](#)

22  
23  
24 [In recent years, many developed countries including the UK, USA and Australia have](#)  
25 [developed national initiatives for better blood transfusion practice, sometimes called](#)  
26 [‘patient blood management’ \(4;5\). These include the development of guidelines on blood](#)  
27 [usage promoting restrictive transfusion strategies and initiatives for using alternatives to](#)  
28 [transfusion \(e.g. cell salvage techniques; improvements in the education and training of](#)  
29 [clinical staff prescribing blood; the provision of mechanisms for reviewing blood use with](#)  
30 [feedback of data to clinicians\). National data on blood usage in the USA suggests an](#)  
31 [estimated decline of 3% over each of the last two years \(2009-2010\) \(4\), and similar data are](#)  
32 [available in the UK where the demand for red cell units, which steadily increased during the](#)  
33 [1990s, has decreased by about 20% in the last 10 years. However, there remains](#)  
34 [considerable variation between hospitals in blood reduction, and national audits of blood](#)  
35 [components in the UK and elsewhere suggest that overall blood usage could be further](#)  
36 [reduced without compromising patient safety \(3\).](#)  
37  
38  
39  
40  
41  
42  
43  
44  
45  
46  
47  
48  
49  
50  
51  
52  
53  
54  
55  
56  
57  
58  
59  
60

1  
2  
3 It is difficult to assess how observational studies may have influenced these changes in  
4 transfusion practice in comparison to evidence from randomized controlled trials, national  
5 guidelines, and process driven initiatives. The most likely answer is that they have all played  
6 a role in changing practice. Randomized controlled trials have found that 'restrictive'  
7 transfusion strategies are associated with similar or improved clinical outcomes compared to  
8 'liberal' transfusion strategies (47). Many national guidelines have adopted restrictive  
9 transfusion strategies (47), while needing to make assumptions about the generalisability of  
10 the findings of randomized controlled trials in specific clinical groups of patients. There have  
11 been many smaller observational studies of process initiatives to reduce transfusion that  
12 also indicate reductions in the use of blood without any significant impact on clinical  
13 outcomes (48-50).  
14  
15  
16  
17  
18  
19  
20  
21  
22  
23  
24  
25  
26  
27  
28

### 29 *Conclusion*

30  
31 The findings from this systematic review of recent large scale observational studies show  
32 considerable variability in the patient populations and study methods when comparing the  
33 effects of RBCT on mortality. Overall, observational studies do show a consistent adverse  
34 effect of RBCT on mortality. Although it seems unlikely that this can be entirely explained by  
35 selective sampling or a predominance of poorer quality observational studies, it remains  
36 possible that even the best conducted adjustments cannot completely eliminate the impact  
37 of confounding, particularly when investigating the effect of RBCT. We therefore believe  
38 that this can only be resolved through well designed and adequately powered randomized  
39 controlled trials. Before these can be conducted, the importance of the research question  
40 and the uncertainty of the current evidence need to be accepted. This requires clearer and  
41 more widespread presentation and understanding of the existing research evidence, to  
42 which we believe this study is a significant contribution.  
43  
44  
45  
46  
47  
48  
49  
50  
51  
52  
53  
54  
55  
56  
57  
58  
59  
60

1  
2  
3  
4  
5 **Author contributions:** SH and OO were involved in the design, implementation, and analysis  
6  
7 of the study and in writing the final manuscript. CH, MM and LY were involved in the design  
8  
9 and analysis of the study and in writing the final manuscript.  
10

11 **Financial disclosures:** None reported.  
12

13 **Funding/support:** This study was funded by NHS Blood and Transplant, Research and  
14  
15 Development, UK.  
16

17 **Additional contributions:** We are grateful to Susan Brunskill for her helpful comments on  
18  
19 this manuscript.  
20  
21  
22  
23  
24

#### 25 References

- 26  
27 (1) Blajchman MA. Landmark studies that have changed the practice of transfusion  
28 medicine. *Transfusion* 2005 September;45(9):1523-30.  
29  
30 (2) Deeks JJ, Dinnes J, D'Amico R, Sowden AJ, Sakarovitch C, Song F, Petticrew M,  
31 Altman DG. Evaluating non-randomised intervention studies. *Health Technol Assess*  
32 2003;7(27):iii-173.  
33  
34 (3) Murphy MF, Stanworth SJ, Yazer M. Transfusion practice and safety: current status  
35 and possibilities for improvement. *Vox Sang* 2011 January;100(1):46-59.  
36  
37 (4) Goodnough LT, Shander A. Patient blood management. *Anesthesiology* 2012  
38 June;116(6):1367-76.  
39  
40 (5) NHS blood transfusion and transplant / Royal College of Physicians national  
41 comparative audit of blood transfusion programme. [http://hospital](http://hospital.blood.co.uk/safe_use/clinical_audit/national_comparative/index.asp)  
42 [blood co](http://hospital.blood.co.uk/safe_use/clinical_audit/national_comparative/index.asp)  
43 [uk/safe\\_use/clinical\\_audit/national\\_comparative/index](http://hospital.blood.co.uk/safe_use/clinical_audit/national_comparative/index.asp) asp [accessed 5 March  
44 2013] 2013.  
45  
46 (6) Bennett-Guerrero E, Zhao Y, O'Brien SM, Ferguson TB, Jr., Peterson ED, Gammie JS,  
47 Song HK. Variation in use of blood transfusion in coronary artery bypass graft  
48 surgery. *JAMA* 2010 October 13;304(14):1568-75.  
49  
50 (7) Aronson D, Dann EJ, Bonstein L, Blich M, Kapeliovich M, Beyar R, Markiewicz W,  
51 Hammerman H. Impact of red blood cell transfusion on clinical outcomes in patients  
52 with acute myocardial infarction. *Am J Cardiol* 2008 July 15;102(2):115-9.  
53  
54 (8) Bochicchio GV, Napolitano L, Joshi M, Bochicchio K, Meyer W, Scalea TM. Outcome  
55 analysis of blood product transfusion in trauma patients: a prospective, risk-adjusted  
56 study. *World J Surg* 2008 October;32(10):2185-9.  
57  
58  
59  
60

- 1
- 2
- 3 (9) Engoren M, Habib RH, Hadaway J, Zacharias A, Schwann TA, Riordan CJ, Durham SJ,  
4 Shah A. The effect on long-term survival of erythrocyte transfusion given for cardiac  
5 valve operations. *Ann Thorac Surg* 2009 July;88(1):95-100, 100.
- 6
- 7 (10) Engoren M, Arslanian-Engoren C. Long-term survival in the intensive care unit after  
8 erythrocyte blood transfusion. *Am J Crit Care* 2009 March;18(2):124-31.
- 9
- 10 (11) Garty M, Cohen E, Zuchenko A, Behar S, Boyko V, Iakobishvili Z, Mittelman M, Battler  
11 A, Shotan A, Gottlieb S, Caspi A, Hasdai D. Blood transfusion for acute  
12 decompensated heart failure--friend or foe? *Am Heart J* 2009 October;158(4):653-8.
- 13
- 14 (12) Jani SM, Smith DE, Share D, Kline-Rogers E, Khanal S, O'Donnell MJ, Gardin J,  
15 Moscucci M. Blood transfusion and in-hospital outcomes in anemic patients with  
16 myocardial infarction undergoing percutaneous coronary intervention. *Clin Cardiol*  
17 2007 October;30(10 Suppl 2):II49-II56.
- 18
- 19 (13) Johnston P, Wynn-Jones H, Chakravarty D, Boyle A, Parker MJ. Is perioperative blood  
20 transfusion a risk factor for mortality or infection after hip fracture? *J Orthop*  
21 *Trauma* 2006 November;20(10):675-9.
- 22
- 23 (14) Khorana AA, Francis CW, Blumberg N, Culakova E, Refaai MA, Lyman GH. Blood  
24 transfusions, thrombosis, and mortality in hospitalized patients with cancer. *Arch*  
25 *Intern Med* 2008 November 24;168(21):2377-81.
- 26
- 27 (15) Koch CG, Li L, Duncan AI, Mihaljevic T, Cosgrove DM, Loop FD, Starr NJ, Blackstone  
28 EH. Morbidity and mortality risk associated with red blood cell and blood-  
29 component transfusion in isolated coronary artery bypass grafting. *Crit Care Med*  
30 2006 June;34(6):1608-16.
- 31
- 32 (16) Koch CG, Li L, Duncan AI, Mihaljevic T, Loop FD, Starr NJ, Blackstone EH. Transfusion  
33 in coronary artery bypass grafting is associated with reduced long-term survival. *Ann*  
34 *Thorac Surg* 2006 May;81(5):1650-7.
- 35
- 36 (17) Murphy GJ, Reeves BC, Rogers CA, Rizvi SI, Culliford L, Angelini GD. Increased  
37 mortality, postoperative morbidity, and cost after red blood cell transfusion in  
38 patients having cardiac surgery. *Circulation* 2007 November 27;116(22):2544-52.
- 39
- 40 (18) Nikolsky E, Mehran R, Sadeghi HM, Grines CL, Cox DA, Garcia E, Tcheng JE, Griffin JJ,  
41 Guagliumi G, Stuckey T, Turco M, Fahy M, Lansky AJ, Stone GW. Prognostic impact of  
42 blood transfusion after primary angioplasty for acute myocardial infarction: analysis  
43 from the CADILLAC (Controlled Abciximab and Device Investigation to Lower Late  
44 Angioplasty Complications) Trial. *JACC Cardiovasc Interv* 2009 July;2(7):624-32.
- 45
- 46 (19) Pedersen AB, Mehnert F, Overgaard S, Johnsen SP. Allogeneic blood transfusion and  
47 prognosis following total hip replacement: a population-based follow up study. *BMC*  
48 *Musculoskelet Disord* 2009;10:167.
- 49
- 50 (20) Rogers MA, Blumberg N, Saint SK, Kim C, Nallamotheu BK, Langa KM. Allogeneic blood  
51 transfusions explain increased mortality in women after coronary artery bypass graft  
52 surgery. *Am Heart J* 2006 December;152(6):1028-34.
- 53
- 54 (21) Rogers MA, Blumberg N, Saint S, Langa KM, Nallamotheu BK. Hospital variation in  
55 transfusion and infection after cardiac surgery: a cohort study. *BMC Med* 2009;7:37.
- 56
- 57
- 58
- 59
- 60

- 1  
2  
3 (22) Salehiomran A, Ahmadi H, Karimi A, Tazik M, Dowlatshahi S, Fathollahi M.S., Abbasi  
4 S.H. Transfusion associated in-hospital mortality and morbidity in isolated coronary  
5 artery bypass graft surgery. *Central European Journal of Medicine* 2009;4(3):286-92.  
6  
7 (23) Stone TJ, Riesenman PJ, Charles AG. Red blood cell transfusion within the first 24  
8 hours of admission is associated with increased mortality in the pediatric trauma  
9 population: a retrospective cohort study. *J Trauma Manag Outcomes* 2008;2(1):9.  
10  
11 (24) Surgenor SD, Kramer RS, Olmstead EM, Ross CS, Sellke FW, Likosky DS, Marrin CA,  
12 Helm RE, Jr., Leavitt BJ, Morton JR, Charlesworth DC, Clough RA, Hernandez F,  
13 Frumiento C, Benak A, DioData C, O'Connor GT. The association of perioperative red  
14 blood cell transfusions and decreased long-term survival after cardiac surgery.  
15 *Anesth Analg* 2009 June;108(6):1741-6.  
16  
17 (25) Taylor RW, O'Brien J, Trottier SJ, Manganaro L, Cytron M, Lesko MF, Arnzen K,  
18 Cappadoro C, Fu M, Plisco MS, Sadaka FG, Veremakis C. Red blood cell transfusions  
19 and nosocomial infections in critically ill patients. *Crit Care Med* 2006  
20 September;34(9):2302-8.  
21  
22 (26) van Straten AH, Bekker MW, Soliman Hamad MA, van Zundert AA, Martens EJ,  
23 Schonberger JP, de Wolf AM. Transfusion of red blood cells: the impact on short-  
24 term and long-term survival after coronary artery bypass grafting, a ten-year follow-  
25 up. *Interact Cardiovasc Thorac Surg* 2010 January;10(1):37-42.  
26  
27 (27) Vincent JL, Sakr Y, Sprung C, Harboe S, Damas P. Are blood transfusions associated  
28 with greater mortality rates? Results of the Sepsis Occurrence in Acutely Ill Patients  
29 study. *Anesthesiology* 2008 January;108(1):31-9.  
30  
31 (28) Weinberg JA, McGwin G, Jr., Marques MB, Cherry SA, III, Reiff DA, Kerby JD, Rue LW,  
32 III. Transfusions in the less severely injured: does age of transfused blood affect  
33 outcomes? *J Trauma* 2008 October;65(4):794-8.  
34  
35 (29) Wu WC, Smith TS, Henderson WG, Eaton CB, Poses RM, Uttley G, Mor V, Sharma SC,  
36 Vezeridis M, Khuri SF, Friedmann PD. Operative blood loss, blood transfusion, and  
37 30-day mortality in older patients after major noncardiac surgery. *Ann Surg* 2010  
38 July;252(1):11-7.  
39  
40 (30) Zilberberg MD, Stern LS, Wiederkehr DP, Doyle JJ, Shorr AF. Anemia, transfusions  
41 and hospital outcomes among critically ill patients on prolonged acute mechanical  
42 ventilation: a retrospective cohort study. *Crit Care* 2008;12(2):R60.  
43  
44 (31) Bernard AC, Davenport DL, Chang PK, Vaughan TB, Zwischenberger JB.  
45 Intraoperative transfusion of 1 U to 2 U packed red blood cells is associated with  
46 increased 30-day mortality, surgical-site infection, pneumonia, and sepsis in general  
47 surgery patients. *J Am Coll Surg* 2009 May;208(5):931-7, 937.  
48  
49 (32) Charles A, Shaikh AA, Walters M, Huehl S, Pomerantz R. Blood transfusion is an  
50 independent predictor of mortality after blunt trauma. *Am Surg* 2007  
51 January;73(1):1-5.  
52  
53 (33) O'Keefe SD, Davenport DL, Minion DJ, Sorial EE, Endean ED, Xenos ES. Blood  
54 transfusion is associated with increased morbidity and mortality after lower  
55 extremity revascularization. *J Vasc Surg* 2010 March;51(3):616-21, 621.  
56  
57  
58  
59  
60

- 1  
2  
3 (34) Ruttinger D, Wolf H, Kuchenhoff H, Jauch KW, Hartl WH. Red cell transfusion: an  
4 essential factor for patient prognosis in surgical critical illness? *Shock* 2007  
5 August;28(2):165-71.  
6  
7 (35) Weightman WM, Gibbs NM, Sheminant MR, Newman MA, Grey DE. Moderate  
8 exposure to allogeneic blood products is not associated with reduced long-term  
9 survival after surgery for coronary artery disease. *Anesthesiology* 2009  
10 August;111(2):327-33.  
11  
12 (36) Edgren G, Kamper-Jorgensen M, Eloranta S, Rostgaard K, Custer B, Ullum H, Murphy  
13 EL, Busch MP, Reilly M, Melbye M, Hjalgrim H, Nyren O. Duration of red blood cell  
14 storage and survival of transfused patients (CME). *Transfusion* 2010  
15 June;50(6):1185-95.  
16  
17 (37) Koch CG, Li L, Sessler DI, Figueroa P, Hoeltge GA, Mihaljevic T, Blackstone EH.  
18 Duration of red-cell storage and complications after cardiac surgery. *N Engl J Med*  
19 2008 March 20;358(12):1229-39.  
20  
21 (38) van de Watering L, Lorinser J, Versteegh M, Westendorp R, Brand A. Effects of  
22 storage time of red blood cell transfusions on the prognosis of coronary artery  
23 bypass graft patients. *Transfusion* 2006 October;46(10):1712-8.  
24  
25 (39) Weinberg JA, McGwin G, Jr., Griffin RL, Huynh VQ, Cherry SA, III, Marques MB, Reiff  
26 DA, Kerby JD, Rue LW, III. Age of transfused blood: an independent predictor of  
27 mortality despite universal leukoreduction. *J Trauma* 2008 August;65(2):279-82.  
28  
29 (40) Marik PE, Corwin HL. Efficacy of red blood cell transfusion in the critically ill: a  
30 systematic review of the literature. *Crit Care Med* 2008 September;36(9):2667-74.  
31  
32 (41) Wilkinson KL, Brunskill SJ, Doree C, Hopewell S, Stanworth S, Murphy MF, Hyde C.  
33 The clinical effects of red blood cell transfusions: an overview of the randomized  
34 controlled trials evidence base. *Transfus Med Rev* 2011 April;25(2):145-55.  
35  
36 (42) Fergusson DA, Hebert P, Hogan DL, LeBel L, Rouvinez-Bouali N, Smyth JA, Sankaran  
37 K, Tinmouth A, Blajchman MA, Kovacs L, Lachance C, Lee S, Walker CR, Hutton B,  
38 Ducharme R, Balchin K, Ramsay T, Ford JC, Kakadekar A, Ramesh K, Shapiro S. Effect  
39 of fresh red blood cell transfusions on clinical outcomes in premature, very low-  
40 birth-weight infants: the ARIPI randomized trial. *JAMA* 2012 October  
41 10;308(14):1443-51.  
42  
43 (43) Lacroix J, Hebert P, Fergusson D, Tinmouth A, Blajchman MA, Callum J, Cook D,  
44 Marshall JC, McIntyre L, Turgeon AF. The Age of Blood Evaluation (ABLE) randomized  
45 controlled trial: study design. *Transfus Med Rev* 2011 July;25(3):197-205.  
46  
47 (44) Steiner ME, Assmann SF, Levy JH, Marshall J, Pulkrabek S, Sloan SR, Triulzi D, Stowell  
48 CP. Addressing the question of the effect of RBC storage on clinical outcomes: the  
49 Red Cell Storage Duration Study (RECESS) (Section 7). *Transfus Apher Sci* 2010  
50 August;43(1):107-16.  
51  
52 (45) Dechartres A, Boutron I, Trinquart L, Charles P, Ravaud P. Single-center trials show  
53 larger treatment effects than multicenter trials: evidence from a meta-epidemiologic  
54 study. *Ann Intern Med* 2011 July 5;155(1):39-51.  
55  
56  
57  
58  
59  
60

- 1  
2  
3 (46) Scherer RW, Langenberg P, von EE. Full publication of results initially presented in  
4 abstracts. *Cochrane Database Syst Rev* 2007;(2):MR000005.  
5  
6 (47) Goodnough LT, Levy JH, Murphy MF. Current concepts in transfusion. *Lancet*  
7 2013;[in press].  
8  
9 (48) Kotze A, Carter LA, Scally AJ. Effect of a patient blood management programme on  
10 preoperative anaemia, transfusion rate, and outcome after primary hip or knee  
11 arthroplasty: a quality improvement cycle. *Br J Anaesth* 2012 June;108(6):943-52.  
12  
13 (49) Freedman J, Luke K, Escobar M, Vernich L, Chiavetta JA. Experience of a network of  
14 transfusion coordinators for blood conservation (Ontario Transfusion Coordinators  
15 [ONTraC]). *Transfusion* 2008 February;48(2):237-50.  
16  
17 (50) Helm RE, Rosengart TK, Gomez M, Klemperer JD, DeBois WJ, Velasco F, Gold JP,  
18 Altorki NK, Lang S, Thomas S, Isom OW, Krieger KH. Comprehensive multimodality  
19 blood conservation: 100 consecutive CABG operations without transfusion. *Ann*  
20 *Thorac Surg* 1998 January;65(1):125-36.  
21  
22  
23  
24  
25  
26  
27  
28  
29  
30  
31  
32  
33  
34  
35  
36  
37  
38  
39  
40  
41  
42  
43  
44  
45  
46  
47  
48  
49  
50  
51  
52  
53  
54  
55  
56  
57  
58  
59  
60

Figure 1: Flow diagram of study inclusion (1 January 2006 to 31 December 2010)

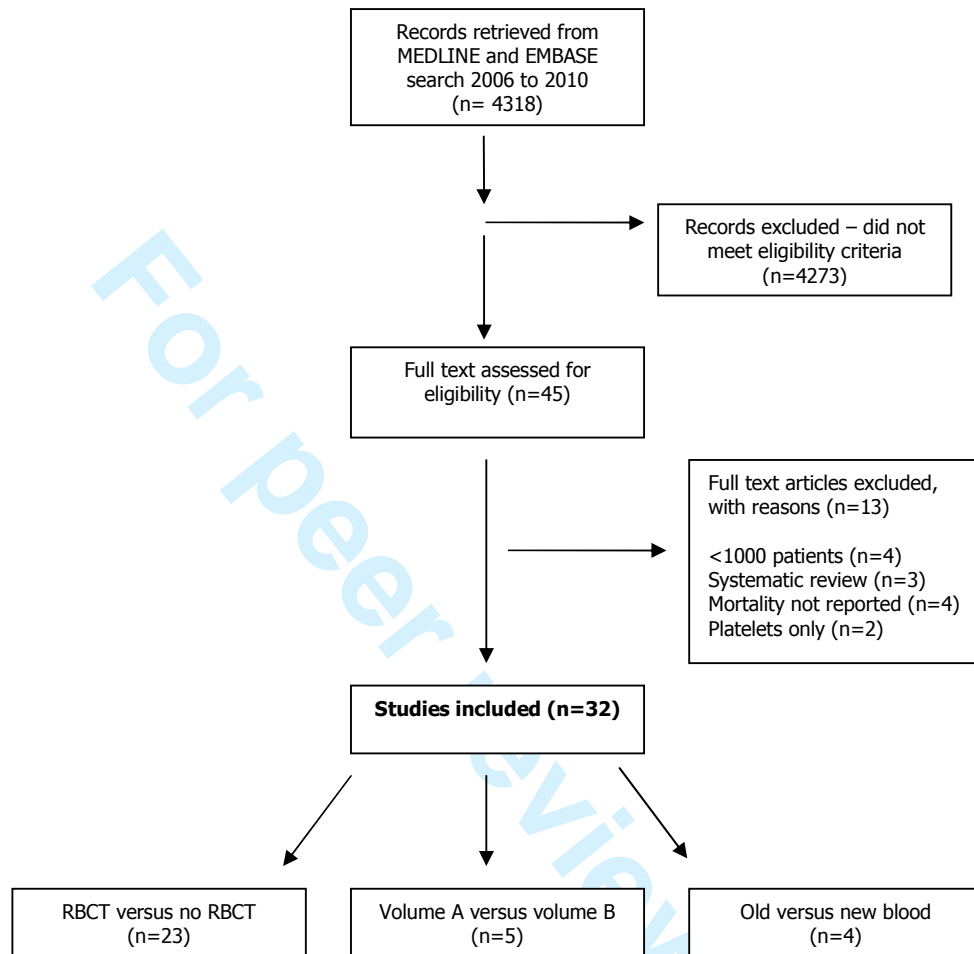



Figure 2: Effect of red blood cell transfusion versus no red blood cell transfusion on mortality (adjusted results)

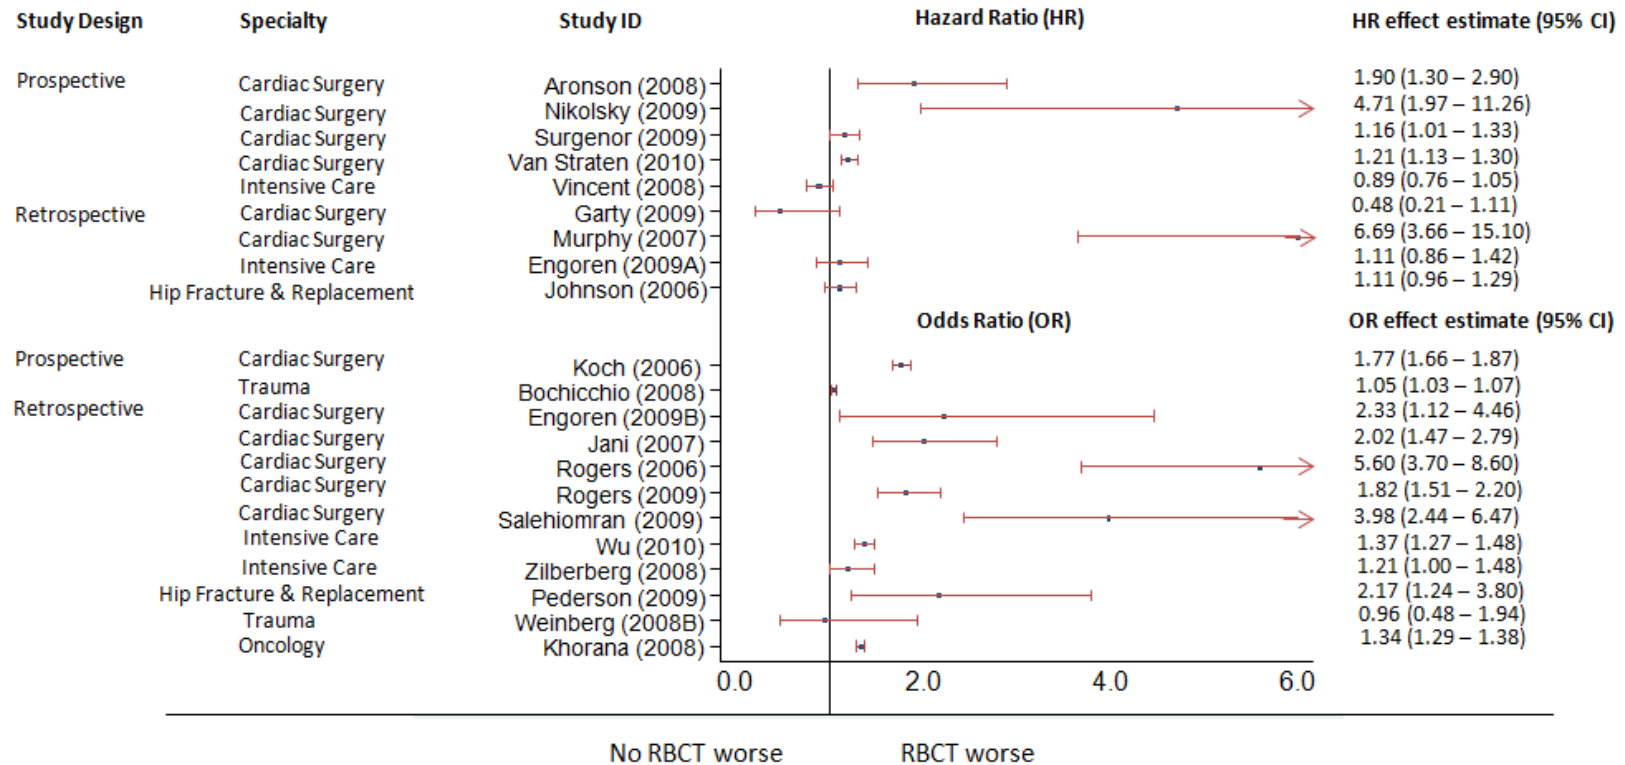

**Table 1: Summary of characteristics of included studies**

| Type of comparison               | RBC vs. no RBC<br>(n=23) | Volume 'A' vs. Volume<br>'B'(n=5) | Old RBC vs. new RBC<br>(n=4) |
|----------------------------------|--------------------------|-----------------------------------|------------------------------|
| <b>Design</b>                    |                          |                                   |                              |
| Prospective                      | 8 (35%)                  | 1 (20%)                           |                              |
| Retrospective                    | 15 (65%)                 | 4 (80%)                           | 4 (100%)                     |
| <b>Country</b>                   |                          |                                   |                              |
| Australia                        |                          | 1 (20%)                           |                              |
| Belgium                          | 1 (4%)                   |                                   |                              |
| Denmark                          | 1 (4%)                   |                                   |                              |
| Germany                          |                          | 1 (20%)                           |                              |
| Iran                             | 1 (4%)                   |                                   |                              |
| Israel                           | 2 (9%)                   |                                   |                              |
| Netherlands                      | 1 (4%)                   |                                   | 1 (25%)                      |
| Sweden                           |                          |                                   | 1 (25%)                      |
| USA                              | 14 (61%)                 | 3 (60%)                           | 2 (50%)                      |
| UK<br>(multiple sites)           | 2 (9%)<br>1 (4%)         |                                   |                              |
| <b>Time period assessed</b>      |                          |                                   |                              |
|                                  | 1989-2008                | 1993-2007                         | 1993-2007                    |
| <b>Sample size (median, IQR)</b> |                          |                                   |                              |
| All patients                     | 4344 (IQR 2085-11963)    | 8215 (IQR 3037-8799)              | 4358 (2264-185019)           |
| RBC transfusion                  | 1068 (IQR 430-5812)      |                                   |                              |
| No RBC transfusion               | 2325 (IQR 1636-6151)     |                                   |                              |
| <b>Disease area</b>              |                          |                                   |                              |
| Cardiac surgery                  | 12 (52%)                 | 2 (40%)                           | 2 (50%)                      |
| Hip fracture/replacement         | 2 (9%)                   |                                   |                              |
| Intensive care                   | 5 (22%)                  | 1 (20%)                           |                              |
| Oncology                         | 1 (4%)                   |                                   |                              |
| Surgery                          |                          | 1 (20%)                           |                              |
| Trauma adults                    | 2 (9%)                   | 1 (20%)                           | 1 (25%)                      |
| Trauma paediatrics               | 1 (4%)                   |                                   |                              |
| Not reported                     |                          |                                   | 1 (25%)                      |
| <b>Prescribing guidance</b>      |                          |                                   |                              |
| Reported                         | 7 (30%)                  | 3 (60%)                           |                              |
| Not reported                     | 16 (70%)                 | 2 (40%)                           | 4 (100%)                     |
| <b>Mortality assessed*</b>       |                          |                                   |                              |
| In hospital                      | 8                        | 2                                 | 2                            |
| 30 days                          | 10                       | 2                                 | 1                            |
| 3 months                         | 3                        |                                   |                              |
| 6 months                         | 3                        |                                   |                              |
| >1 year                          | 4                        | 1                                 | 2                            |
| Time period not specified        | 2                        |                                   | 1                            |

\*studies reported mortality for >1 time point based on binary only and / or time-to-event outcome

Table 2: Method of adjusted analysis

| Type of comparison                              | RBCT vs. no RBCT<br>(n=23) | Volume 'A' vs. Volume 'B'<br>(n=5) | Old RBC vs. new RBC<br>(n=4) |
|-------------------------------------------------|----------------------------|------------------------------------|------------------------------|
| Choice of covariates                            |                            |                                    |                              |
| Pre-specified                                   | 13 (57%)                   | 5 (100%)                           | 4 (100%)                     |
| Post hoc                                        |                            |                                    |                              |
| Unclear                                         | 10 (43%)                   |                                    |                              |
| No. of covariates measured                      |                            |                                    |                              |
| 1-5                                             | 2 (9%)                     |                                    |                              |
| 6-10                                            | 4 (17%)                    | 1 (20%)                            | 2 (50%)                      |
| 11-20                                           | 3 (13%)                    | 2 (40%)                            |                              |
| >20                                             | 12 (52%)                   | 2 (40%)                            | 1 (25%)                      |
| Unclear                                         | 2 (9%)                     |                                    | 1 (25%)                      |
| Important covariates assessed                   |                            |                                    |                              |
| Age                                             | 23 (100%)                  | 5 (100%)                           | 4 (100%)                     |
| Sex                                             | 23 (100%)                  | 5 (100%)                           | 4 (100%)                     |
| Smoking                                         | 8 (35%)                    | 1 (20%)                            | 1 (25%)                      |
| Co-morbidity                                    | 21 (91%)                   | 5 (100%)                           | 3 (75%)                      |
| Hb level                                        | 14 (61%)                   | 4 (80%)                            | 2 (50%)                      |
| Important covariates incorporated into analysis |                            |                                    |                              |
| Yes                                             | 8 (35%)                    | 1 (20%)                            | 1 (25%)                      |
| No                                              | 15 (65%)                   | 4 (80%)                            | 3 (75%)                      |
| Method of adjustment                            |                            |                                    |                              |
| Cox proportional hazard                         | 6 (26%)                    | 1 (20%)                            | 1 (25%)                      |
| Logistic regression                             | 14 (61%)                   | 4 (80%)                            | 2 (50%)                      |
| Both *                                          | 3 (13%)                    |                                    |                              |
| Not reported                                    |                            |                                    | 1 (25%)                      |

\*studies reported >1 method of adjustment when mortality was assessed for >1 time point

**Table 3: Presentation of results for unadjusted and adjusted analysis (mortality)**

| Type of comparison                      | RBCT vs. no RBCT<br>(n=23) | Volume 'A' vs. Volume 'B'<br>(n=5) | Old RBC vs. new RBC<br>(n=4) |
|-----------------------------------------|----------------------------|------------------------------------|------------------------------|
| Summary statistic for each group        |                            |                                    |                              |
| Unadjusted only                         | 5 (22%)                    | 2 (40%)                            |                              |
| Adjusted only                           | 1 (4%)                     |                                    |                              |
| Both                                    | 7 (30%)                    |                                    | 1 (25%)                      |
| Not reported                            | 10 (44%)                   | 3 (60%)                            | 3 (75%)                      |
| Treatment effect                        |                            |                                    |                              |
| Unadjusted only                         | 1 (4%)                     |                                    |                              |
| Adjusted only                           | 12 (52%)                   | 5 (100%)                           | 2 (50%)                      |
| Both                                    | 8 (35%)                    |                                    | 1 (25%)                      |
| Not reported                            | 2 (9%)                     |                                    | 1 (25%)                      |
| Confidence interval of treatment effect |                            |                                    |                              |
| Unadjusted only                         |                            |                                    |                              |
| Adjusted only                           | 10 (43%)                   | 3 (60%)                            | 2 (50%)                      |
| Both                                    | 8 (35%)                    |                                    | 1 (25%)                      |
| Not reported                            | 5 (22%)                    | 2 (40%)                            | 1 (25%)                      |
| P-value for treatment effect            |                            |                                    |                              |
| Unadjusted only                         | 7 (30%)                    |                                    |                              |
| Adjusted only                           |                            | 1 (20%)                            |                              |
| Both                                    | 1 (4%)                     |                                    | 1 (25%)                      |
| Not reported                            | 15 (66%)                   | 4 (80%)                            | 3 (75%)                      |
| Unadjusted analysis*                    |                            |                                    |                              |
| Statistically significant               | 17 (74%)                   |                                    | 2 (50%)                      |
| Statistically non-significant           | 1 (4%)                     |                                    |                              |
| Not reported                            | 5 (22%)                    | 5 (100%)                           | 2 (50%)                      |
| Adjusted analysis*                      |                            |                                    |                              |
| Statistically significant               | 15 (65%)                   | 2 (40%)                            | 1 (25%)                      |
| Statistically non-significant           | 7 (31%)                    | 2 (40%)                            | 3 (75%)                      |
| Not reported                            | 1 (4%)                     | 1 (20%)                            |                              |

\*mortality outcome – if >1 time point analysed the time point with the non-significant result was recorded

Table 4: Assessment of methodological quality of the included studies

| Study ID                  | Data collected prospectively | Sample representative | Important covariates measured | Important covariates incorporated into analysis | Method of dealing with confounding adequate* |
|---------------------------|------------------------------|-----------------------|-------------------------------|-------------------------------------------------|----------------------------------------------|
| Aronson 2008 (3)          | Yes                          | Unclear               | Yes                           | Yes                                             | Yes                                          |
| Bernard 2009 (27)         | No                           | Yes                   | Yes                           | Yes                                             | Yes                                          |
| Bochicchio 2008 (4)       | Yes                          | Yes                   | No                            | No                                              | No                                           |
| Charles 2007 (28)         | No                           | Yes                   | No                            | No                                              | No                                           |
| Edgren 2010 (32)          | No                           | Yes                   | No                            | No                                              | No                                           |
| Engoren 2009 (5)          | No                           | Yes                   | No                            | No                                              | No                                           |
| Engoren 2009 (6)          | No                           | Yes                   | No                            | No                                              | No                                           |
| Garty 2009 (7)            | No                           | Yes                   | Yes                           | Yes                                             | Yes                                          |
| Jani 2007 (8)             | No                           | No (>60 years)        | Yes                           | Yes                                             | Yes                                          |
| Johnson 2006 (9)          | No                           | Unclear               | No                            | No                                              | No                                           |
| Khorana 2008 (10)         | No                           | Yes                   | No                            | No                                              | No                                           |
| Koch 2006 (11,12)         | Yes                          | Yes                   | Yes                           | Yes                                             | Yes                                          |
| Koch 2008 (33)            | No                           | Yes                   | Yes                           | Yes                                             | Yes                                          |
| Murphy 2007 (13)          | No                           | Yes                   | Yes                           | Yes                                             | Yes                                          |
| Nikolsky 2009 (14)        | Yes                          | Yes                   | Yes                           | Yes                                             | Yes                                          |
| O'Keeffe 2010 (29)        | Yes                          | Yes                   | No                            | No                                              | No                                           |
| Pederson 2009 (15)        | No                           | Yes                   | No                            | No                                              | No                                           |
| Rogers 2006 (16)          | No                           | No (>65 years)        | No                            | No                                              | No                                           |
| Rogers 2009 (17)          | No                           | No (> 65 years)       | No                            | No                                              | No                                           |
| Ruttinger 2007 (30)       | No                           | Yes                   | No                            | No                                              | No                                           |
| Salehiomran 2009 (18)     | No                           | Yes                   | Yes                           | Yes                                             | Yes                                          |
| Stone 2008 (19)           | No                           | No (< 16 years))      | No                            | No                                              | No                                           |
| Surgenor 2009 (20)        | Yes                          | Yes                   | No                            | No                                              | No                                           |
| Taylor 2006 (21)          | Yes                          | Yes                   | No                            | No                                              | No                                           |
| van de Watering 2006 (34) | No                           | Yes                   | No                            | No                                              | No                                           |
| van Straten 2010 (22)     | Yes                          | Yes                   | No                            | No                                              | No                                           |
| Vincent 2008 (23)         | Yes                          | Yes                   | No                            | No                                              | No                                           |
| Weightman 2009 (31)       | Yes                          | Yes                   | No                            | No                                              | No                                           |
| Weinburg 2008 (24)        | No                           | Yes                   | No                            | No                                              | No                                           |
| Weinburg 2008 (35)        | No                           | Yes                   | No                            | No                                              | No                                           |

1  
2  
3  
4  
5  
6  
7  
8  
9  
10  
11  
12  
13  
14  
15  
16  
17  
18  
19  
20  
21  
22  
23  
24  
25  
26  
27  
28  
29  
30  
31  
32  
33  
34  
35  
36  
37  
38  
39  
40  
41  
42  
43  
44  
45  
46  
47  
48  
49  
50  
51  
52  
53  
54  
55  
56  
57  
58  
59  
60

|                         |    |                     |     |     |     |
|-------------------------|----|---------------------|-----|-----|-----|
| Wu 2010 (25)            | No | No<br>( > 65 years) | Yes | Yes | Yes |
| Zilberberg 2008<br>(26) | No | Yes                 | No  | No  | No  |

\*The method of dealing with confounding was deemed adequate if important covariates were measured and adjusted for in the analysis.

For peer review only



# PRISMA 2009 Checklist

| Section/topic                      | #  | Checklist item                                                                                                                                                                                                                                                                                              | Reported on page # |
|------------------------------------|----|-------------------------------------------------------------------------------------------------------------------------------------------------------------------------------------------------------------------------------------------------------------------------------------------------------------|--------------------|
| <b>TITLE</b>                       |    |                                                                                                                                                                                                                                                                                                             |                    |
| Title                              | 1  | Identify the report as a systematic review, meta-analysis, or both.                                                                                                                                                                                                                                         | 1                  |
| <b>ABSTRACT</b>                    |    |                                                                                                                                                                                                                                                                                                             |                    |
| Structured summary                 | 2  | Provide a structured summary including, as applicable: background; objectives; data sources; study eligibility criteria, participants, and interventions; study appraisal and synthesis methods; results; limitations; conclusions and implications of key findings; systematic review registration number. | 2                  |
| <b>INTRODUCTION</b>                |    |                                                                                                                                                                                                                                                                                                             |                    |
| Rationale                          | 3  | Describe the rationale for the review in the context of what is already known.                                                                                                                                                                                                                              | 4                  |
| Objectives                         | 4  | Provide an explicit statement of questions being addressed with reference to participants, interventions, comparisons, outcomes, and study design (PICOS).                                                                                                                                                  | 5                  |
| <b>METHODS</b>                     |    |                                                                                                                                                                                                                                                                                                             |                    |
| Protocol and registration          | 5  | Indicate if a review protocol exists, if and where it can be accessed (e.g., Web address), and, if available, provide registration information including registration number.                                                                                                                               | N/A                |
| Eligibility criteria               | 6  | Specify study characteristics (e.g., PICOS, length of follow-up) and report characteristics (e.g., years considered, language, publication status) used as criteria for eligibility, giving rationale.                                                                                                      | 5                  |
| Information sources                | 7  | Describe all information sources (e.g., databases with dates of coverage, contact with study authors to identify additional studies) in the search and date last searched.                                                                                                                                  | 6                  |
| Search                             | 8  | Present full electronic search strategy for at least one database, including any limits used, such that it could be repeated.                                                                                                                                                                               | Appendix 1         |
| Study selection                    | 9  | State the process for selecting studies (i.e., screening, eligibility, included in systematic review, and, if applicable, included in the meta-analysis).                                                                                                                                                   | 6                  |
| Data collection process            | 10 | Describe method of data extraction from reports (e.g., piloted forms, independently, in duplicate) and any processes for obtaining and confirming data from investigators.                                                                                                                                  | 6                  |
| Data items                         | 11 | List and define all variables for which data were sought (e.g., PICOS, funding sources) and any assumptions and simplifications made.                                                                                                                                                                       | 6-7                |
| Risk of bias in individual studies | 12 | Describe methods used for assessing risk of bias of individual studies (including specification of whether this was done at the study or outcome level), and how this information is to be used in any data synthesis.                                                                                      | 7-8                |
| Summary measures                   | 13 | State the principal summary measures (e.g., risk ratio, difference in means).                                                                                                                                                                                                                               | 8                  |
| Synthesis of results               | 14 | Describe the methods of handling data and combining results of studies, if done, including measures of consistency (e.g., $I^2$ for each meta-analysis)                                                                                                                                                     | 8                  |



# PRISMA 2009 Checklist

Page 1 of 2

| Section/topic                 | #  | Checklist item                                                                                                                                                                                           | Reported on page # |
|-------------------------------|----|----------------------------------------------------------------------------------------------------------------------------------------------------------------------------------------------------------|--------------------|
| Risk of bias across studies   | 15 | Specify any assessment of risk of bias that may affect the cumulative evidence (e.g., publication bias, selective reporting within studies).                                                             | 8                  |
| Additional analyses           | 16 | Describe methods of additional analyses (e.g., sensitivity or subgroup analyses, meta-regression), if done, indicating which were pre-specified.                                                         | 8                  |
| <b>RESULTS</b>                |    |                                                                                                                                                                                                          |                    |
| Study selection               | 17 | Give numbers of studies screened, assessed for eligibility, and included in the review, with reasons for exclusions at each stage, ideally with a flow diagram.                                          | Figure 1           |
| Study characteristics         | 18 | For each study, present characteristics for which data were extracted (e.g., study size, PICOS, follow-up period) and provide the citations.                                                             | Appendix 2         |
| Risk of bias within studies   | 19 | Present data on risk of bias of each study and, if available, any outcome level assessment (see item 12).                                                                                                | 14 & table 4       |
| Results of individual studies | 20 | For all outcomes considered (benefits or harms), present, for each study: (a) simple summary data for each intervention group (b) effect estimates and confidence intervals, ideally with a forest plot. | 8-14 & figure 2    |
| Synthesis of results          | 21 | Present results of each meta-analysis done, including confidence intervals and measures of consistency.                                                                                                  | Figure 2           |
| Risk of bias across studies   | 22 | Present results of any assessment of risk of bias across studies (see Item 15).                                                                                                                          | 8-14 & table 4     |
| Additional analysis           | 23 | Give results of additional analyses, if done (e.g., sensitivity or subgroup analyses, meta-regression [see Item 16]).                                                                                    | N/A                |
| <b>DISCUSSION</b>             |    |                                                                                                                                                                                                          |                    |
| Summary of evidence           | 24 | Summarize the main findings including the strength of evidence for each main outcome; consider their relevance to key groups (e.g., healthcare providers, users, and policy makers).                     | 15-16              |
| Limitations                   | 25 | Discuss limitations at study and outcome level (e.g., risk of bias), and at review-level (e.g., incomplete retrieval of identified research, reporting bias).                                            | 16-17              |
| Conclusions                   | 26 | Provide a general interpretation of the results in the context of other evidence, and implications for future research.                                                                                  | 17-18              |
| <b>FUNDING</b>                |    |                                                                                                                                                                                                          |                    |
| Funding                       | 27 | Describe sources of funding for the systematic review and other support (e.g., supply of data); role of funders for the systematic review.                                                               | 19                 |



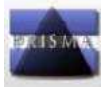

# PRISMA 2009 Checklist

For peer review only

1  
2  
3  
4  
5  
6  
7  
8  
9  
10  
11  
12  
13  
14  
15  
16  
17  
18  
19  
20  
21  
22  
23  
24  
25  
26  
27  
28  
29  
30  
31  
32  
33  
34  
35  
36  
37  
38  
39  
40  
41  
42  
43  
44  
45  
46  
47  
48  
49

**APPENDIX 1: Search strategies****MEDLINE (Ovid)**

1. ERYTHROCYTE TRANSFUSION/
2. \*BLOOD TRANSFUSION/
3. (hemotransfus\* or haemotransfus\*).tw.
4. ((transfus\* or retransfus\*) adj1 (trigger\* or level\* or threshold\* or rule\* or restrict\* or limit\*)).tw.
5. (transfusion\* adj1 (management or practice\* or polic\* or strateg\* or guideline\* or indication\* or protocol\* or criteri\*)).tw.
6. ((blood adj1 management) or (management adj1 blood) or (blood adj1 support) or (blood adj1 requirement\*)).tw.
7. ((red cell\* adj1 management) or (red cell\* adj1 support) or (red cell adj1 requirement\*)).tw.
8. (blood adj1 need\*).tw. or transfus\*.ti.
9. or/1-8
10. BLOOD TRANSFUSION/
11. ERYTHROCYTES/
12. (red cell\* or red blood cell\* or erythrocyte\* or RBC\*).tw.
13. 11 or 12
14. 10 and 13
15. (critical\* or intensive or trauma or surg\* or injur\* or postinjur\* OR organ failure\* OR sepsis or septic OR infection\* OR infectious OR ARDS OR acute respiratory distress OR multiorgan).ti. and transfus\*.ab.
16. 9 or 14 or 15
17. BLOOD PRESERVATION/
18. transfus\*.mp.
19. 17 and 18
20. ((storage or stored or storing or age\* or aging or old or older or duration or fresh\* or preserv\* or conserv\*) adj2 (whole blood or red blood cell\* or red cell\* or RBC\*)).tw. and transfus\*.mp.
21. (fresh blood or new blood or old\* blood or fresh red blood cells or new red blood cells or old\* red blood cells or fresh red cells or new red cells or old\* red cells).tw.
22. 16 or 19 or 20 or 21
23. PROGNOSIS/
24. DISEASE FREE SURVIVAL/
25. exp CRITICAL CARE/
26. TREATMENT FAILURE/
27. exp MORTALITY/
28. SURVIVAL/
29. SURVIVAL ANALYSIS/
30. RISK ASSESSMENT/ or RISK FACTORS/
31. TREATMENT OUTCOME/
32. (survival\* or survivor\* or nonsurvivor\* or survived or surviving).ti,ab.
33. ((predictor\* or prediction\*) adj1 death).tw.
34. (prognos\* or mortality).tw.
35. (outcome\* adj2 (therap\* or treatment\*)).ti,ab.
36. ((risk adj assessment) or (associated adj risk)).tw.
37. (risk\* or association\* or causalit\* or causation or cause\*).ti.
38. exp POSTOPERATIVE COMPLICATIONS/
39. exp INTRAOPERATIVE COMPLICATIONS/

40. or/23- 39
41. 22 and 40
42. BLOOD TRANSFUSION/ae, co, mo, ut or ERYTHROCYTE TRANSFUSION/ae, co, mo, ut
43. ((reaction\* or effect\* or efficac\* or complication\* or risk\* or adverse\* or hazard\* or accident\* or incident\* or morbid\* or death\* or mortalit\* or outcome\*) adj3 (transfus\* or postransfus\* or RBC\* or red cell\* or erythrocyte\*)).tw.
44. (transfus\* or posttransfus\*).ti.
45. or/41-44
46. EPIDEMIOLOGIC STUDIES/
47. exp CASE CONTROL STUDIES/
48. exp COHORT STUDIES/
49. (case\* adj2 control\*).tw.
50. cohort\*.ti,ab.
51. (follow up adj (study or studies)).tw.
52. (observational adj2 (study or studies)).tw.
53. ((controlled adj2 trial\*1) or (controlled adj2 stud\*) or (comparative adj trial\*) or (comparative adj stud\*) or (comparison adj group\*) or (comparator adj group\*)).tw.
54. longitudinal.tw.
55. retrospective\*.tw.
56. cross sectional.tw.
57. CROSS-SECTIONAL STUDIES/
58. Controlled clinical trial.pt.
59. CROSSOVER STUDIES/
60. Comparative study.pt.
61. CLINICAL TRIALS AS TOPIC/
62. exp CONTROLLED CLINICAL TRIALS AS TOPIC/
63. (nonrandomi\* or (non adj randomi\*)).tw.
64. or/46-63
65. 45 and 64

#### EMBASE (Ovid)

1. ERYTHROCYTE TRANSFUSION/
2. \*BLOOD TRANSFUSION/ or \*BLOOD COMPONENT THERAPY/
3. (hemotransfus\* or haemotransfus\*).tw.
4. ((transfus\* or retransfus\*) adj1 (trigger\* or level\* or threshold\* or rule\* or restrict\* or limit\*)).tw.
5. (transfusion\* adj1 (management or practice\* or polic\* or strateg\* or guideline\* or indication\* or protocol\* or criteri\*)).tw.
6. ((blood adj1 management) or (management adj1 blood) or (blood adj1 support) or (blood adj1 requirement\*)).tw.
7. ((red cell\* adj1 management) or (red cell\* adj1 support) or (red cell adj1 requirement\*)).tw.
8. (blood adj1 need\*).tw. or transfus\*.ti.
9. or/1-8
10. BLOOD TRANSFUSION/
11. ERYTHROCYTE/
12. (red cell\* or red blood cell\* or erythrocyte\* or RBC\*).tw.
13. 11 or 12
14. 10 and 13

- 1
- 2
- 3 15. (critical\* or intensive or trauma or surg\* or injur\* or postinjur\* OR organ failure\* OR
- 4 sepsis or septic OR infection\* OR infectious OR ARDS OR acute respiratory distress OR
- 5 multiorgan).ti. and transfus\*.ab.
- 6 16. 9 or 14 or 15
- 7 17. BLOOD STORAGE/ or ERYTHROCYTE PRESERVATION/
- 8 18. transfus\*.mp.
- 9 19. 17 and 18
- 10 20. ((storage or stored or storing or age\* or aging or old or older or duration or fresh\* or
- 11 preserv\* or conserv\*) adj2 (whole blood or red blood cell\* or red cell\* or RBC\*)).tw. and
- 12 transfus\*.mp.
- 13 21. (fresh blood or new blood or old\* blood or fresh red blood cells or new red blood cells or
- 14 old\* red blood cells or fresh red cells or new red cells or old\* red cells).tw.
- 15 22. 16 or 19 or 20 or 21
- 16 23. PROGNOSIS/
- 17 24. exp SURVIVAL/
- 18 25. exp INTENSIVE CARE/
- 19 20 26. exp TREATMENT OUTCOME/
- 21 27. exp EPIDEMIOLOGY/
- 22 28. RISK ASSESSMENT/ or
- 23 29. RISK BENEFIT ANALYSIS/ or RISK FACTOR/
- 24 30. RISK MANAGEMENT/
- 25 31. RISK REDUCTION/
- 26 32. (survival\* or survivor\* or nonsurvivor\* or survived or surviving).ti,ab.
- 27 33. ((predictor\* or prediction\*) adj1 death).tw.
- 28 34. (prognos\* or mortality).tw.
- 29 30 35. (outcome\* adj2 (therap\* or treatment\*)).ti,ab.
- 31 36. (risk assessment or associated risk).tw.
- 32 37. (risk\* or association\* or causalit\* or causation or cause\*).ti.
- 33 38. exp POSTOPERATIVE COMPLICATION/
- 34 39. PEROPERATIVE COMPLICATION/
- 35 40. or/23-39
- 36 41. 22 and 40
- 37 42. ((reaction\* or effect\* or efficac\* or complication\* or risk\* or adverse\* or hazard\* or
- 38 accident\* or incident\* or morbid\* or death\* or mortalit\* or outcome\*) adj3 (transfus\* or
- 39 postransfus\* or RBC\* or red cell\* or erythrocyte\*)).tw.
- 40 43. (transfus\* and posttransfus\*).ti.
- 41 44. or/41-43
- 42 45. Clinical Study/
- 43 44 46. exp Case Control Study/
- 45 47. Family Study/
- 46 48. Longitudinal Study/
- 47 49. Retrospective Study/
- 48 50. Prospective Study/
- 49 51. Randomized Controlled Trials/
- 50 52. 50 not 51
- 51 53. Cohort Analysis/
- 52 54. Comparative Study/
- 53 55. cohort\*.ti,ab.
- 54 55 56. (case\* adj2 control\*).tw.
- 56 57. (follow up adj (study or studies)).tw.
- 57 58 59 60 58. (observational adj2 (study or studies)).tw.

- 1
- 2
- 3 59. (epidemiologic\* adj (study or studies)).tw.
- 4 60. (cross sectional adj (study or studies)).tw.
- 5 61. (retrospective\* or longitudinal\*).tw.
- 6 62. ((controlled adj2 trial\*1) or (controlled adj2 stud\*) or (comparative adj trial\*) or
- 7 (comparative adj stud\*) or (comparison adj group\*) or (comparator adj group\*)).tw.
- 8 63. (nonrandomi\* or (non adj randomi\*)).tw.
- 9 64. or/45-49, 52-63
- 10 65. 44 and 64
- 11
- 12
- 13
- 14
- 15
- 16
- 17
- 18
- 19
- 20
- 21
- 22
- 23
- 24
- 25
- 26
- 27
- 28
- 29
- 30
- 31
- 32
- 33
- 34
- 35
- 36
- 37
- 38
- 39
- 40
- 41
- 42
- 43
- 44
- 45
- 46
- 47
- 48
- 49
- 50
- 51
- 52
- 53
- 54
- 55
- 56
- 57
- 58
- 59
- 60

For peer review only

**APPENDIX 2: Table of excluded studies**

| <b>Study ID</b>                       | <b>Reference</b>                                                                                                                                                                                                                                        | <b>Reason for exclusion</b>                 |
|---------------------------------------|---------------------------------------------------------------------------------------------------------------------------------------------------------------------------------------------------------------------------------------------------------|---------------------------------------------|
| <a href="#">Bennett-Guerrero 2010</a> | <a href="#">Bennett-Guerrero E, Zhao Y, O'Brien SM, et al. Variation in use of blood transfusion in coronary artery bypass graft surgery. JAMA. 2010 Oct 13;304(14):1568-75.</a>                                                                        | <a href="#">Mortality data not reported</a> |
| <a href="#">Duchesne 2008</a>         | <a href="#">Duchesne JC, Hunt JP, Wahl G, et al. Review of current blood transfusions strategies in a mature level I trauma center: were we wrong for the last 60 years? J Trauma. 2008 Aug;65(2):272-6</a>                                             | <a href="#">&lt;1000 patients</a>           |
| <a href="#">Fung 2006</a>             | <a href="#">Fung MK, Moore K, Ridenour M, et al. Clinical effects of reverting from leukoreduced to nonleukoreduced blood in cardiac surgery. Transfusion. 2006 Mar;46(3):386-91.</a>                                                                   | <a href="#">&lt;1000 patients</a>           |
| <a href="#">Karkouti 2006a</a>        | <a href="#">Karkouti K, Wijeyesundera DN, Yau TM, et al. Platelet transfusions are not associated with increased morbidity or mortality in cardiac surgery. Can J Anaesth. 2006 Mar;53(3):279-87.</a>                                                   | <a href="#">Platelets only</a>              |
| <a href="#">Karkouti 2006b</a>        | <a href="#">Karkouti K, Yau TM, Rensburg Av, et al. The effects of a treatment protocol for cardiac surgical patients with excessive blood loss on clinical outcomes. Vox Sang. 2006 Aug;91(2):148-56.</a>                                              | <a href="#">Mortality data not reported</a> |
| <a href="#">Kneyber 2009</a>          | <a href="#">Kneyber MC, Gazendam RP, Markhorst DG, et al. Length of storage of red blood cells does not affect outcome in critically ill children. Intensive Care Med. 2009 Jan;35(1):179-80.</a>                                                       | <a href="#">&lt;1000 patients</a>           |
| <a href="#">Lelubre 2009</a>          | <a href="#">Lelubre C, Piaquerelli M, Vincent JL. Association between duration of storage of transfused red blood cells and morbidity and mortality in adult patients: myth or reality? Transfusion. 2009 Jul;49(7):1384-94.</a>                        | <a href="#">Systematic review</a>           |
| <a href="#">Marik 2008</a>            | <a href="#">Marik PE, Corwin HL. Efficacy of red blood cell transfusion in the critically ill: a systematic review of the literature. Crit Care Med. 2008 Sep;36(9):2667-74.</a>                                                                        | <a href="#">Systematic review</a>           |
| <a href="#">Muller 2008</a>           | <a href="#">Müller MH, Moubarak P, Wolf H, et al. Independent determinants of early death in critically ill surgical patients. Shock. 2008 Jul;30(1):11-6.</a>                                                                                          | <a href="#">Mortality data not reported</a> |
| <a href="#">Oliver 2009</a>           | <a href="#">Oliver E, Carrio ML, Rodríguez-Castro D, et al. Relationships among haemoglobin level, packed red cell transfusion and clinical outcomes in patients after cardiac surgery. Intensive Care Med. 2009 Sep;35(9):1548-55.</a>                 | <a href="#">Mortality data not reported</a> |
| <a href="#">Van de Watering 2008</a>  | <a href="#">van de Watering LM, Brand A. Effects of Storage of Red Cells. Transfus Med Hemother. 2008;35(5):359-367.</a>                                                                                                                                | <a href="#">Systematic review</a>           |
| <a href="#">Welsby 2010</a>           | <a href="#">Welsby IJ, Lockhart E, Phillips-Bute B, et al. Storage age of transfused platelets and outcomes after cardiac surgery. Transfusion. 2010 Nov;50(11):2311-7.</a>                                                                             | <a href="#">Platelets only</a>              |
| <a href="#">Whyte 2009</a>            | <a href="#">Whyte RK, Kirpalani H, Asztalos EV, et al. Neurodevelopmental outcome of extremely low birth weight infants randomly assigned to restrictive or liberal hemoglobin thresholds for blood transfusion. Pediatrics. 2009 Jan;123(1):207-13</a> | <a href="#">&lt;1000 patients</a>           |

1  
2  
3  
4  
5  
6  
7  
8  
9  
10  
11  
12  
13  
14  
15  
16  
17  
18  
19  
20  
21  
22  
23  
24  
25  
26  
27  
28  
29  
30  
31  
32  
33  
34  
35  
36  
37  
38  
39  
40  
41  
42  
43  
44  
45  
46  
47  
48  
49

APPENDIX 32: Characteristics of included studies

| Study ID                                                               | Design                                                                                                                                                                                                           | Objective                                                                                      | Participants                                                           | Intervention (exposure)                                                                                                | Comparator (control)                               | Outcome                               |
|------------------------------------------------------------------------|------------------------------------------------------------------------------------------------------------------------------------------------------------------------------------------------------------------|------------------------------------------------------------------------------------------------|------------------------------------------------------------------------|------------------------------------------------------------------------------------------------------------------------|----------------------------------------------------|---------------------------------------|
| <b>Red blood cells versus no red blood cells – prospective studies</b> |                                                                                                                                                                                                                  |                                                                                                |                                                                        |                                                                                                                        |                                                    |                                       |
| Aronson 2008 (7)                                                       | Design: prospective cohort<br>How pts recruited: admitted to intensive care unit<br>Country: Israel<br>Year: 2000 to 2006<br>Funding: not reported                                                               | Effects of RBCT in patients with acute myocardial infarction                                   | Adults with acute MI in an intensive coronary care unit (n=2358)       | RBCT (n=192)<br><br>Prescribing guidance: not reported                                                                 | No RBCT(n=2134)                                    | Mortality at 6 months #               |
| Bochicchio 2008 (8)                                                    | Design: prospective cohort<br>How pts recruited: admitted to Adams Cowley Shock Trauma Centre<br>Country: USA<br>Year: 2002 to 2004<br>Funding: not reported                                                     | Effects of RBC and other blood product transfusion (RBC and FFP) on outcome in trauma patients | Adults admitted to intensive care unit (n=1172)                        | RBC and other blood product transfusion (n=786); RBC only (n=246)<br><br>Prescribing guidance: no formal protocol used | No RBC or other blood product transfusion (n=386). | Mortality (time period not specified) |
| Koch 2006 (15,16)                                                      | Design: prospective cohort<br>How pts recruited: admitted to large tertiary hospital (Cleveland Clinic)<br>Country: USA<br>Year: 1995 to 2002<br>Funding: Non industry funded                                    | Effect of RBCT on mortality in patients undergoing coronary artery bypass surgery              | Adults undergoing coronary artery bypass grafting (n=11963)            | RBCT (n=5812)<br><br>Prescribing guidance: not reported                                                                | No RBCT(n=6151)                                    | Mortality in-hospital                 |
| Nikolsky 2009 (18)                                                     | Design: prospective cohort<br>How pts recruited: part of CADILLAC randomized trial comparing different mechanical reperfusion strategies<br>Country: multi centre<br>Year: 1997 to 1999<br>Funding: not reported | Effect of RBCT in patients undergoing angioplasty for acute myocardial infarction              | Adults undergoing angioplasty for acute myocardial infarction (n=2060) | RBCT (n=82)<br><br>Prescribing guidance: not reported                                                                  | No RBCT (n=1978)                                   | Mortality at 30 days and 1 year #     |
| Surgenor 2009 (24)                                                     | Design: prospective cohort<br>How pts recruited: admitted to one of eight medical centres as part of the Northern New                                                                                            | Effect of RBCT on mortality in patients undergoing coronary artery bypass surgery              | Adults undergoing coronary artery bypass surgery (n=9079)              | RBCT (n=3254)<br><br>Prescribing guidance: reported as at the                                                          | No RBCT (n=5825)                                   | Mortality over 5 years #              |

|                                                                          |                                                                                                                                                                                          |                                                                                                       |                                                               |                                                                                                  |                                       |                                               |
|--------------------------------------------------------------------------|------------------------------------------------------------------------------------------------------------------------------------------------------------------------------------------|-------------------------------------------------------------------------------------------------------|---------------------------------------------------------------|--------------------------------------------------------------------------------------------------|---------------------------------------|-----------------------------------------------|
|                                                                          | England Cardiovascular Disease Study Group<br>Country: USA<br>Year: 2001 to 2004<br>Funding: not reported                                                                                |                                                                                                       |                                                               | discretion of the patient care team                                                              |                                       |                                               |
| Taylor 2006 (25)                                                         | Design: prospective cohort<br>How pts recruited: admitted to intensive care unit at the St John's Mercy Medical Centre<br>Country: USA<br>Year: 2001 to 2003<br>Funding: not reported    | Effect of RBCT on nosocomial infection and mortality in critically ill patients                       | Adults admitted to critical care unit (n=2085)                | RBCT (n=449)<br><br>Prescribing guidance: reported as at the discretion of the patient care team | No RBCT (n=1636)                      | Mortality (time period not specified)         |
| Van Straten 2010 (26)                                                    | Design: prospective cohort<br>How pts recruited: admitted to hospital (centre not specified)<br>Country: Netherlands<br>Year: 1998 to 2007<br>Funding: not reported                      | Effect of RBCT on long and short term survival in patients undergoing coronary artery bypass grafting | Patients undergoing coronary artery bypass grafting (n=10425) | RBCT (n=3597)<br><br>Prescribing guidance: not reported                                          | No RBCT (n=6828)                      | Mortality ≤ 30 days and mortality > 30 days # |
| Vincent 2008 (27)                                                        | Design: prospective cohort<br>How pts recruited: admitted to European intensive care unit (n=198 units)<br>Country: Belgium<br>Year: 1 May to 15 May 2002<br>Funding: industry supported | Effect of RBCT on mortality in European intensive care units                                          | Adults admitted intensive care unit (n=3147)                  | RBCT (n=1040)<br><br>Prescribing guidance: not reported                                          | No RBCT (n=2107)                      | Mortality in hospital at 30 days #            |
| <b>Red blood cells versus no red blood cells – retrospective studies</b> |                                                                                                                                                                                          |                                                                                                       |                                                               |                                                                                                  |                                       |                                               |
| Engoren 2009 (9)                                                         | Design: retrospective database<br>How pts recruited: admitted to St Vincent Mercy Medical Centre intensive care unit<br>Country: USA<br>Year: 2001 to 2002<br>Funding: not reported      | Effects of RBCT in critically ill patients (excluded cardiac surgery patients)                        | Adults admitted to intensive care unit (n=2213)               | RBCT (n=404)<br><br>Prescribing guidance: haemoglobin <8 g/dl                                    | No RBCT (n=1809)                      | Mortality at 30 days and 180 days #           |
| Engoren 2009 (10)                                                        | Design: retrospective database<br>How pts recruited: admitted to St Vincent Mercy Medical Centre                                                                                         | Effects of RBCT in cardiac surgery patients                                                           | Adults admitted for cardiac surgery (n=1823)                  | RBCT (n=378)<br><br>CABG and value                                                               | No RBCT (n=615)<br><br>CABG and value | Mortality within 30 days >30 days             |



|                   |                                                                                                                                                                                                                                                          |                                                                                                                                                                       |                                                                                        |                                                                                                      |                                           |                                                      |
|-------------------|----------------------------------------------------------------------------------------------------------------------------------------------------------------------------------------------------------------------------------------------------------|-----------------------------------------------------------------------------------------------------------------------------------------------------------------------|----------------------------------------------------------------------------------------|------------------------------------------------------------------------------------------------------|-------------------------------------------|------------------------------------------------------|
|                   | for cardiac surgery<br>Country: USA<br>Year: 1991 to 2007<br>Funding: not reported                                                                                                                                                                       |                                                                                                                                                                       |                                                                                        | RBCT (n=534)<br><br>Prescribing guidance: not reported                                               | No RBCT (n=296)                           |                                                      |
| Garty 2009 (11)   | Design: retrospective database<br>How pts recruited: admitted to cardiac or internal medicine ward in 25 public hospitals<br>Country: Israel<br>Year: 2003<br>Funding: Non industry funded                                                               | Effect of RBCT (unclear if included other blood products) on patients with acute decompressed heart failure                                                           | Adults with acute decompressed heart failure (n=2335)                                  | RBCT (n=166)<br><br>Prescribing guidance: not reported                                               | No RBCT(n=2169)                           | Mortality in-hospital, 30 days, 1 year and 4 years # |
| Jani 2007 (12)    | Design: retrospective database (Blue Cross Blue Shield of Michigan Cardiovascular Consortium)<br>How pts recruited: admitted to academic medical centres<br>Country: USA<br>Year: 1997 to 2004<br>Funding: Blue Cross Blue Shield of Michigan            | Effect of RBCT and other blood product on in-patient mortality in anaemic patients undergoing percutaneous coronary intervention (PCI) for myocardial infarction (MI) | Adults (>60 years) with anaemia undergoing PCI within 7 days for having a MI (n=4623). | RBCT and other blood product (n=1033)<br><br>Prescribing guidance: no formal protocol used           | No RBCT or other blood product (n=3590).  | Mortality in-hospital                                |
| Johnson 2006 (13) | Design: retrospective database<br>How pts recruited: admitted to orthopaedic unit (District General Hospital, Peterborough)<br>Country: UK<br>Year: 1989 to 2002<br>Funding: Non industry funded                                                         | Effect of RBCT (unclear if included other blood products) on mortality in patients with hip fracture                                                                  | Adults admitted to orthopaedic unit with hip fracture (n=3625)                         | RBCT (n=1068)<br><br>Prescribing guidance: haemoglobin <8 g/dl                                       | No RBCT (n=2503)                          | Mortality at 30, 120 and 365 days #                  |
| Khorana 2008 (14) | Design: retrospective database (University Health System Consortium)<br>How pts recruited: admitted to academic medical centres<br>Country: USA<br>Year: 1995 to 2003<br>Funding: National Cancer Institute and National Heart, Lung and Blood Institute | Effect of RBCT and other blood product on thrombosis and mortality in hospitalised patients with cancer                                                               | Adults with cancer admitted to hospital (n=504208)                                     | RBCT and other blood product (n=74051); RBC only (n=58814)<br><br>Prescribing guidance: not reported | No RBCT or other blood product (n=430157) | Mortality in-hospital                                |

|                    |                                                                                                                                                                                                                                                                                     |                                                                                                                         |                                                                               |                                                                                  |                                         |                                                            |
|--------------------|-------------------------------------------------------------------------------------------------------------------------------------------------------------------------------------------------------------------------------------------------------------------------------------|-------------------------------------------------------------------------------------------------------------------------|-------------------------------------------------------------------------------|----------------------------------------------------------------------------------|-----------------------------------------|------------------------------------------------------------|
| Murphy 2007 (17)   | Design: 3 retrospective databases (PATS (Patient analysis and Tracking System), haematological and blood bank studys)<br>How pts recruited: admitted to Bristol Royal Infirmary for adult cardiac surgery<br>Country: UK<br>Year: 1996 to 2003<br>Funding: British Heart Foundation | Effect of RBCT on mortality, post operative morbidity and cost in patients undergoing cardiac surgery                   | Adults > 16 years undergoing cardiac surgery (n=8598)                         | RBCT (n=4909)<br><br>Prescribing guidance: not reported                          | No RBCT (n=3689)                        | Mortality up to 7 years post surgery (median 4.15 years) # |
| Pederson 2009 (19) | Design: retrospective database (Danish Hip Arthroplasty Registry)<br>How pts recruited: admitted from 20 orthopaedic departments<br>Country: Denmark<br>Year: 1999 to 2007<br>Funding: not reported                                                                                 | Effect of RBCT on mortality in patients undergoing total hip replacement                                                | Adults undergoing surgery for total hip replacement (n=28087)                 | RBCT (n=9063)<br><br>Prescribing guidance: not reported                          | No RBCT (n=19024)                       | Mortality at 90 days                                       |
| Rogers 2006 (20)   | Design: retrospective database (Center for Medicare and Medicaid Services)<br>How pts recruited: Medicare beneficiaries hospitalised for coronary artery bypass surgery<br>Country: USA<br>Year: 1997 to 1998<br>Funding: non industry funded                                       | Effect of RBCT on mortality in patients undergoing coronary artery bypass surgery                                       | Older adults (> 65 Years) undergoing coronary artery bypass surgery (n=9218)  | RBCT (n=6893)<br><br>Prescribing guidance: not reported                          | No RBCT (n=2325)                        | Mortality within 100 days                                  |
| Rogers 2009 (21)   | Design: retrospective database<br>How pts recruited: Medicare beneficiaries who received coronary artery bypass surgery<br>Country: USA<br>Year: 2003 to 2006<br>Funding: Michigan Foundation                                                                                       | Effect of RBCT and other blood product on infection and mortality in patients undergoing coronary artery bypass surgery | Older adults (> 65 years) undergoing coronary artery bypass surgery (n=24789) | RBCT and other blood product (n=20789)<br><br>Prescribing guidance: not reported | No RBCT or other blood product (n=4000) | Mortality in hospital and at 30 days post discharge        |

|                       |                                                                                                                                                                                                                                                                                        |                                                                                                                              |                                                                              |                                                                                              |                    |                       |
|-----------------------|----------------------------------------------------------------------------------------------------------------------------------------------------------------------------------------------------------------------------------------------------------------------------------------|------------------------------------------------------------------------------------------------------------------------------|------------------------------------------------------------------------------|----------------------------------------------------------------------------------------------|--------------------|-----------------------|
| Salehiomran 2009 (22) | Design: retrospective database<br>How pts recruited: patients admitted to Tehran Heart Centre who received coronary artery bypass surgery<br>Country: Iran<br>Year: 2002 to 2008<br>Funding: not reported                                                                              | Effect of RBCT (unclear if included other blood products) on mortality in patients undergoing coronary artery bypass surgery | Adults undergoing coronary artery bypass surgery (n=14152)                   | RBCT (n=2333)<br><br>Prescribing guidance: hematocrit <25-26%                                | No RBCT (n=11773)  | Mortality at 30 days  |
| Stone 2008 (23)       | Design: retrospective database<br>How pts recruited: admitted to paediatric trauma centre<br>Country: USA<br>Year: 1998 to 2006<br>Funding: not reported                                                                                                                               | Effect of RBCT on mortality in paediatric trauma patients                                                                    | Children with blunt or penetrating injury admitted to trauma centre (n=1639) | RBCT (n=106)<br><br>Prescribing guidance: reported no specific transfusion protocol was used | No RBCT (n=1533)   | Mortality in-hospital |
| Weinberg 2008 (28)    | Design: retrospective database<br>How pts recruited: admitted to trauma centre at University of Alabama<br>Country: USA<br>Year: 2000 to 2007<br>Funding: not reported                                                                                                                 | Effect of RBCT on mortality in trauma patients                                                                               | Less severely injured adults admitted to trauma centre (n=1624)              | RBCT (n=430)<br><br>Prescribing guidance: not reported                                       | No RBCT (n=1194)   | Mortality in hospital |
| Wu 2010 (29)          | Design: retrospective database (Department of Veteran Affairs and National Surgical Quality Improvement Program)<br>How pts recruited: admitted to one of 142 veteran hospitals and requiring major non cardiac surgery<br>Country: USA<br>Year: 1997 to 2004<br>Funding: not reported | Effect of RBCT on mortality in older adults after major non cardiac surgery                                                  | Older adults (>65 years) undergoing major non cardiac surgery (n=239286)     | RBCT(n=22515)<br><br>Prescribing guidance: not reported                                      | No RBCT (n=216771) | Mortality at 30 days  |
| Zilberberg 2008 (30)  | Design: retrospective database (Henry Ford Health System includes data from 7 hospitals in USA)<br>How pts recruited: admitted to hospital and requiring                                                                                                                               | Effect of RBCT on mortality in critically ill patients requiring prolonged ventilation                                       | Adults critically ill and requiring prolonged ventilation 96 ≥hours (n=4344) | RBCT (n=2912)<br><br>Prescribing guidance: not reported                                      | No RBCT (n=1432)   | Mortality in-hospital |

|                                                                     |                                                                                                                                                                                                                                                     |                                                                                      |                                                                              |                                                                                                                                                                                               |                                                                                                                                                                                                       |                       |
|---------------------------------------------------------------------|-----------------------------------------------------------------------------------------------------------------------------------------------------------------------------------------------------------------------------------------------------|--------------------------------------------------------------------------------------|------------------------------------------------------------------------------|-----------------------------------------------------------------------------------------------------------------------------------------------------------------------------------------------|-------------------------------------------------------------------------------------------------------------------------------------------------------------------------------------------------------|-----------------------|
|                                                                     | ventilation<br>Country: USA<br>Year: 2000 to 2005<br>Funding: industry supported                                                                                                                                                                    |                                                                                      |                                                                              |                                                                                                                                                                                               |                                                                                                                                                                                                       |                       |
| <b>Volume 'A' red blood cells versus volume 'B' red blood cells</b> |                                                                                                                                                                                                                                                     |                                                                                      |                                                                              |                                                                                                                                                                                               |                                                                                                                                                                                                       |                       |
| Bernard 2009<br>(31)                                                | Design: retrospective database<br>How pts recruited: admitted to hospital and requiring major surgery<br>Country: USA<br>Year: 2005 to 2006<br>Funding: industry supported                                                                          | Effect of RBCT and volume of blood in patients undergoing major surgery              | Adults undergoing major surgery (n=125177)                                   | Volume of RBCT (classified as: 0 units RBC, 1 unit, 2 units, 3-4 units, 5-9 units >10 units intra operative and >4 units post operative)<br><br>Prescribing guidance: no formal protocol used | Another volume of RBCT (classified as: 0 units RBC, 1 unit, 2 units, 3-4 units, 5-9 units >10 units intra operative and >4 units post operative)<br><br>Prescribing guidance: no formal protocol used | Mortality at 30 days  |
| Charles 2007<br>(32)                                                | Design: retrospective database (NTRACS trauma registry)<br>How pts recruited: admitted to Level 2 trauma centre<br>Country: USA<br>Year: 1994 to 2004<br>Funding: not reported                                                                      | Effect of RBCT and volume of blood in patients with blunt trauma injuries            | Adults >18 yrs with blunt trauma injuries admitted to trauma centre (n=8215) | Volume of RBCT (classified as: 0 units RBC, 1-2 units, 3-5 units, >6 units)<br><br>Prescribing guidance: no formal protocol used                                                              | Another volume of RBCT (classified as: 0 units RBC, 1-2 units, 3-5 units, >6 units)<br><br>Prescribing guidance: no formal protocol used                                                              | Mortality at 24 hours |
| O'Keefle 2010<br>(33)                                               | Design: retrospective database (American College of Surgeons National Quality Improvement Program)<br>How pts recruited: admitted from 173 hospitals and undergoing vascular surgery<br>Country: USA<br>Year: 2005 to 2007<br>Funding: not reported | Effect of RBCT on mortality in patients undergoing lower extremity revascularization | Adults with peripheral arterial disease (n=8799)                             | Volume of RBCT (classified as: 0 units RBC, 1 to 2 and >3 units)<br><br>Prescribing guidance: not reported                                                                                    | Another volume of RBCT (classified as: 0 units RBC, 1 to 2 and >3 units)<br><br>Prescribing guidance: not reported                                                                                    | Mortality at 30 days  |
| Ruttinger 2007<br>(34)                                              | Design: retrospective database<br>How pts recruited: admitted to surgical intensive care unit LMU University Hospital., Munich<br>Country: Germany                                                                                                  | Effect of RBCT on mortality in critically ill patients                               | Patients admitted to intensive care unit (n=3037)                            | Volume of RBCT (classified as: 1 to 2 units (n=676) RBC, 3 to 4 (n=345), 5 to 8 (n=301) and >8 units                                                                                          | Another volume of RBCT (classified as: 1 to 2 units RBC, 3 to 4, 5 to 8 and >8 units)                                                                                                                 | Mortality in-hospital |

|                                                              |                                                                                                                                                                                                                                                                            |                                                                                                                                       |                                                                                                                   |                                                                                                                                                                                                   |                                                                                                                                                                     |                                                            |
|--------------------------------------------------------------|----------------------------------------------------------------------------------------------------------------------------------------------------------------------------------------------------------------------------------------------------------------------------|---------------------------------------------------------------------------------------------------------------------------------------|-------------------------------------------------------------------------------------------------------------------|---------------------------------------------------------------------------------------------------------------------------------------------------------------------------------------------------|---------------------------------------------------------------------------------------------------------------------------------------------------------------------|------------------------------------------------------------|
|                                                              | Year: 1993 to 2005<br>Funding: not reported                                                                                                                                                                                                                                |                                                                                                                                       |                                                                                                                   | (n=471)<br><br>Prescribing guidance:<br>haemoglobin <8-9 g/dl                                                                                                                                     | Prescribing guidance:<br>haemoglobin <8-9 g/dl                                                                                                                      |                                                            |
| Weightman<br>2009 (35)                                       | Design: prospective cohort<br>How pts recruited: admitted to<br>Sir Charles Gairdner hospital<br>Country: Australia<br>Year: 1993 to 2000<br>Funding: not reported                                                                                                         | Effect of RBCT and<br>other blood product<br>on long term survival<br>in patients<br>undergoing coronary<br>artery bypass<br>grafting | Patients undergoing<br>coronary artery bypass<br>grafting (n=1841) and<br>survived longer than 60<br>days         | Volume of RBCT and<br>other blood product<br>(classified as: 0 units<br>(n=779), 1-2 units<br>(n=402), 3-6 units<br>(n=333) and > 6units<br>(n=327))<br><br>Prescribing guidance: not<br>reported | Another volume of<br>RBCT and other blood<br>product (classified as:<br>0 units, 1-2 units, 3-6<br>units and > 6units)<br><br>Prescribing guidance:<br>not reported | Mortality (mean<br>follow up 8.1<br>years)#                |
| <b>'Older' red blood cells versus 'newer' red blood cell</b> |                                                                                                                                                                                                                                                                            |                                                                                                                                       |                                                                                                                   |                                                                                                                                                                                                   |                                                                                                                                                                     |                                                            |
| Edgren 2010<br>(36)                                          | Design: retrospective database<br>How pts recruited: received<br>blood transfusion as recorded in<br>Scandinavian Donations and<br>Transfusion Study<br>Country: Sweden and Denmark<br>Year: 1995 to 2002<br>Funding: National Heart, Lung<br>and Blood Institute of NIH   | Effect of RBCT<br>duration of storage<br>on mortality                                                                                 | Adults receiving $\geq 1$ RBC<br>transfusion (n=364037)                                                           | RBCT stored for 0-9<br>days, 10-19 days, 20-29<br>days, 30-42 days<br><br>Prescribing guidance: no<br>formal protocol used                                                                        | RBCT stored for 0-9<br>days, 10-19 days, 20-<br>29 days, 30-42 days<br><br>Prescribing guidance:<br>no formal protocol<br>used                                      | Mortality $\leq 7$ days<br>and mortality 8 to<br>730 days# |
| Koch 2008 (37)                                               | Design: retrospective database<br>(Cleveland clinic blood bank and<br>cardiac registries)<br>How pts recruited: admitted to<br>Cleveland Clinic<br>Country: USA<br>Year: 1998 to 2006<br>Funding: National Institute for<br>Health Research and Joseph<br>Drown Foundation | Effect of RBCT<br>duration of storage<br>on mortality and<br>serious complication<br>in patients<br>undergoing cardiac<br>surgery     | Adults >18 years<br>undergoing coronary-<br>artery bypass grafting,<br>cardiac-valve surgery, or<br>both (n=6002) | RBCT stored for $\leq 14$<br>days (n=2872)<br><br>Prescribing guidance: no<br>formal protocol used                                                                                                | RBCT stored for >14<br>days (n=3130)<br><br>Prescribing guidance:<br>no formal protocol<br>used                                                                     | Mortality in-hospital<br>and at 1 year                     |
| Van de Watering<br>2006 (38)                                 | Design: retrospective database<br>(Leiden University Medical<br>Centre)                                                                                                                                                                                                    | Effect of RBCT<br>duration of storage<br>on mortality in                                                                              | Adults undergoing<br>cardiothoracic surgery<br>(n=2715)                                                           | RBCT stored for <18<br>days (n=942)                                                                                                                                                               | RBCT stored for >18<br>days (n=941)                                                                                                                                 | Mortality at 30<br>days#                                   |

1  
2  
3  
4  
5  
6  
7  
8  
9  
10  
11  
12  
13  
14  
15  
16  
17  
18  
19  
20  
21  
22  
23  
24  
25  
26  
27  
28  
29  
30  
31  
32  
33  
34  
35  
36  
37  
38  
39  
40  
41  
42  
43  
44  
45  
46  
47  
48  
49

|                    |                                                                                                                                                                        |                                                                                                  |                                                            |                                                                               |                                                                               |                                       |
|--------------------|------------------------------------------------------------------------------------------------------------------------------------------------------------------------|--------------------------------------------------------------------------------------------------|------------------------------------------------------------|-------------------------------------------------------------------------------|-------------------------------------------------------------------------------|---------------------------------------|
|                    | How pts recruited: admitted to cardiothoracic surgery unit<br>Country: Netherlands<br>Year: 1993 to 1999<br>Funding: none industry                                     | cardiac patients                                                                                 |                                                            | Prescribing guidance: no formal protocol used                                 | Prescribing guidance: no formal protocol used                                 |                                       |
| Weinberg 2008 (39) | Design: retrospective database<br>How pts recruited: admitted to trauma centre at University of Alabama<br>Country: USA<br>Year: 2000 to 2007<br>Funding: not reported | Effect of leukodepleted RBCT transfusion and duration of storage on mortality in trauma patients | Severely injured adults admitted to trauma centre (n=1813) | RBCT stored for <14 days<br><br>Prescribing guidance: no formal protocol used | RBCT stored for ≥14 days<br><br>Prescribing guidance: no formal protocol used | Mortality (time period not specified) |

RBCT=red blood cell transfusion; NR: not reported; #time-to-event outcome

Peer review only

**APPENDIX 43: Statistical methods and presentation of unadjusted and adjusted results of the included studies**

| Study ID                                                               | Study covariates                                                                                                                                       | Comparison                                                                                                       | Unadjusted results                                                       | Adjusted results                                                                                                                              | Method of adjustment                                                                                                                                                   |
|------------------------------------------------------------------------|--------------------------------------------------------------------------------------------------------------------------------------------------------|------------------------------------------------------------------------------------------------------------------|--------------------------------------------------------------------------|-----------------------------------------------------------------------------------------------------------------------------------------------|------------------------------------------------------------------------------------------------------------------------------------------------------------------------|
| <b>Red blood cells versus no red blood cells – prospective studies</b> |                                                                                                                                                        |                                                                                                                  |                                                                          |                                                                                                                                               |                                                                                                                                                                        |
| Aronson 2008 (7)                                                       | Number covariates: 16<br>Age: Yes<br>Sex: Yes<br>Smoking: Yes<br>Co-morbidity: Yes<br>Hb level: Yes<br>Covariates pre-specified                        | RBCT versus no RBCT<br><br>Mortality at 6 months#                                                                | RBCT (n): NR<br>No RBCT (n): NR<br>Hazard ratio 4.4 (95% CI 3.2 to 5.9)  | RBCT (n): NR<br>No RBCT (n): NR<br>Hazard ratio 1.9 (95% CI 1.3 to 2.9)                                                                       | Nature of adjustment: transfusion propensity, baseline characteristics, nadir haemoglobin<br>Type of model used: logistic regression<br>Number covariates in model: 16 |
| Bochicchio 2008 (8)                                                    | Number covariates: 5<br>Age: Yes<br>Sex: Yes<br>Smoking: No<br>Co-morbidity: Yes<br>Hb level: No<br>Unclear if covariates pre-specified or data driven | RBCT and other blood product versus no RBCT or other blood products<br><br>Mortality (time period not specified) | RBCT: 147/786<br>No RBCT: 32/386<br>p<0.001<br>(Odds ratio not reported) | RBCT: 147/786<br>No RBCT: 32/386<br>Odds ratio 1.05 (95% CI 1.03 to 1.07)                                                                     | Nature of adjustment: age, ISS, admission GCS<br>Type of model used: logistic regression<br>Number covariates in model: 3                                              |
| Koch 2006 (15,16)                                                      | Number covariates: multiple<br>Age: yes<br>Sex: yes<br>Smoking: yes<br>Co-morbidity: yes<br>HB level: yes<br>Covariates were pre-specified             | RBCT versus no RBCT<br><br>Mortality in hospital                                                                 | RBCT (n): NR<br>No RBCT (n): NR<br>Odds ratio 1.78 (95% CI 1.70 to 1.87) | RBCT (n): NR<br>No RBCT (n): NR<br>Odds ratio 1.77 (1.67 to 1.87)                                                                             | Nature of adjustment: multiple covariates<br>Type of model used: logistic regression<br>Number covariate in model: multiple covariates                                 |
| Nikolsky 2009 (18)                                                     | Number covariates: 25<br>Age: yes<br>Sex: yes<br>Smoking: yes<br>Co-morbidity: yes<br>HB level: yes<br>Covariates pre-specified                        | RBCT versus no RBCT<br><br>Mortality at 30 days and 1 year#                                                      | Not reported                                                             | Mortality at 30 days<br>RBCT (n): NR<br>No RBCT (n): NR<br>Hazard ratio 4.71(95% CI 1.97 to 11.26)<br><br>Mortality at 1 year<br>RBCT (n): NR | Nature of adjustment: transfusion propensity<br>Type of model used: Cox proportional hazards model<br>Number covariate in model: 19                                    |

1  
2  
3  
4  
5  
6  
7  
8  
9  
10  
11  
12  
13  
14  
15  
16  
17  
18  
19  
20  
21  
22  
23  
24  
25  
26  
27  
28  
29  
30  
31  
32  
33  
34  
35  
36  
37  
38  
39  
40  
41  
42  
43  
44  
45  
46  
47  
48  
49

|                       |                                                                                                                                      |                                                                         |                                                                                                                              |                                                                                                                                                                                                                                                                                         |                                                                                                                                      |
|-----------------------|--------------------------------------------------------------------------------------------------------------------------------------|-------------------------------------------------------------------------|------------------------------------------------------------------------------------------------------------------------------|-----------------------------------------------------------------------------------------------------------------------------------------------------------------------------------------------------------------------------------------------------------------------------------------|--------------------------------------------------------------------------------------------------------------------------------------|
|                       |                                                                                                                                      |                                                                         |                                                                                                                              | No RBCT (n): NR<br>Hazard ratio 3.16 (95% CI 1.66 to 6.03)                                                                                                                                                                                                                              |                                                                                                                                      |
| Surgenor 2009 (24)    | Number covariates: multiple<br>Age: yes<br>Sex: yes<br>Smoking: no<br>Co-morbidity: yes<br>Hb level: yes<br>Covariates pre-specified | RBCT versus no RBCT<br><br>Mortality within 5 years#                    | RBCT (n): NR<br>No RBCT (n): NR<br>Hazard ratio 1.94 (95% CI 1.71 to 2.20)                                                   | RBCT (n): NR<br>No RBCT (n): NR<br>Hazard ratio 1.16 (95% CI 1.01 to 1.33)                                                                                                                                                                                                              | Nature of adjustment: propensity model<br>Type of model used: Cox proportion hazard model<br>Number covariates in model: 13          |
| Taylor 2006 (25)      | Number covariates: 5<br>Age: yes<br>Sex: yes<br>Smoking: no<br>Co-morbidity: yes<br>Hb level: no<br>Covariates pre-specified         | RBCT versus no RBCT<br><br>Mortality (time period not specified)        | RBCT: 98/449<br>No RBCT: 166/1636<br>p<0.001<br>(only p value reported)                                                      | POS ≤ 25%<br>RBCT: 47/147<br>No RBCT: 105/336<br>p=0.88<br><br>POS 25% ≤ 50%<br>RBCT: 17/126<br>No RBCT: 23/358<br>p=0.013<br><br>POS 50% ≤ 75%<br>RBCT: 14/94<br>No RBCT: 100/390<br>P<0.0001<br><br>POS >75%<br>RBCT: 3/39<br>No RBCT: 4/444<br>p=0.14<br><br>(only p value reported) | Nature of adjustment: mortality predication model (POS)<br>Type of model used: logistic regression<br>Number covariates in model: NR |
| Van Straten 2010 (26) | Number covariates: 16<br>Age: yes<br>Sex: yes<br>Smoking: no<br>Co-morbidity: yes<br>Hb level: no<br>Unclear if covariates pre-      | RBCT versus no RBCT<br><br>Mortality ≤ 30 days and mortality > 30 days# | Mortality ≤ 30 days<br>RBCT (n): NR<br>No RBCT (n): NR<br>Hazard ratio 1.31 (95% CI 1.27 to 1.35)<br><br>Mortality > 30 days | Mortality ≤ 30 days<br>RBCT (n): NR<br>No RBCT (n): NR<br>Hazard ratio 1.21 (95% CI 1.13 to 1.30)<br><br>Mortality > 30 days                                                                                                                                                            | Nature of adjustment: unclear<br>Type of model used: Cox proportional hazards model<br>Number covariates in model: NR                |



|                                                                          |                                                                                                                                      |                                                                  |                                                                                                                                                                                                                                                                        |                                                                                                                                                                                                                                                                                |                                                                                                                                                                                                           |
|--------------------------------------------------------------------------|--------------------------------------------------------------------------------------------------------------------------------------|------------------------------------------------------------------|------------------------------------------------------------------------------------------------------------------------------------------------------------------------------------------------------------------------------------------------------------------------|--------------------------------------------------------------------------------------------------------------------------------------------------------------------------------------------------------------------------------------------------------------------------------|-----------------------------------------------------------------------------------------------------------------------------------------------------------------------------------------------------------|
|                                                                          | specified or data driven                                                                                                             |                                                                  | Hazard ratio 1.16 (95% CI 1.13 to 1.20)                                                                                                                                                                                                                                | Hazard ratio 1.04 (95% CI 0.99 to 1.07)                                                                                                                                                                                                                                        |                                                                                                                                                                                                           |
| Vincent 2008 (27)                                                        | Number covariates: 8<br>Age: yes<br>Sex: yes<br>Smoking :no<br>Co-morbidity: yes<br>Hb level: no<br>Covariates pre-specified         | RBCT versus no RBCT<br><br>Mortality at 30 days in hospital#     | RBCT: 311/1040<br>No RBCT: 436/2107<br>p<0.001<br>(only p value reported)                                                                                                                                                                                              | RBCT: NR<br>No RBCT: NR<br>Hazard ratio 0.89 (95% CI 0.76 to 1.05) p=0.16                                                                                                                                                                                                      | Nature of adjustment: multiple covariates<br>Type of model used: Cox proportional hazards model<br>Number covariates in model: 8                                                                          |
| <b>Red blood cells versus no red blood cells – retrospective studies</b> |                                                                                                                                      |                                                                  |                                                                                                                                                                                                                                                                        |                                                                                                                                                                                                                                                                                |                                                                                                                                                                                                           |
| Engoren 2009 (9)                                                         | Number covariates: 25<br>Age: Yes<br>Sex: Yes<br>Smoking: No<br>Co-morbidity: Yes<br>Hb level: Yes<br>Covariates pre-specified       | RBCT versus no RBCT<br><br>Mortality at 30 days and 180 days#    | Mortality 30 days<br>RBCT: 101/404<br>No RBCT: 265/1809<br><br>Mortality 180 days<br>RBCT: 150/404<br>No RBCT: 414/1809<br>p<0.01<br>(Hazard ratios not reported)                                                                                                      | Mortality 30 days<br>RBCT: NR<br>No RBCT: NR<br>Hazard ratio 1.11 (95% CI 0.86 to 1.42)<br><br>Mortality 180 days<br>RBCT: NR<br>No RBCT: NR<br>Hazard ratio 1.14 (95% CI 0.83 to 1.58)                                                                                        | Nature of adjustment: multiple variables<br>Type of model used: Cox proportional hazard modelling<br>Number covariates in model: NR                                                                       |
| Engoren 2009 (10)                                                        | Number covariates: multiple<br>Age: Yes<br>Sex: Yes<br>Smoking: No<br>Co-morbidity: Yes<br>Hb level: Yes<br>Covariates pre-specified | RBCT versus no RBCT<br><br>Mortality within 30 days and >30 days | Mortality within 30 days<br>Value only:<br>RBCT: 26/993<br>No RBCT: 16/993<br>CABG and value:<br>RBCT: 69/830<br>No RBCT: 14/830<br><br>Mortality >30 days<br>Value only:<br>RBCT: 160/993<br>No RBCT: 165/993<br>CABG and value:<br>RBCT: 279/830<br>No RBCT: 113/830 | Mortality within 30 days<br>Value only: Odds ratio 1.95 (95% CI 0.97 to 3.91)<br>CABG and value: Odds ratio 2.23 (95% CI 1.12 to 4.46)<br><br>Mortality >30 days<br>Value only: Risk ratio 1.25 (95% CI 0.97 to 1.61)<br>CABG and value: Risk ratio 1.44 (95% CI 1.13 to 1.84) | Nature of adjustment: propensity score<br>Type of model used: Cox proportional hazard modelling (mortality >30 days) and logistic regression (mortality within 30 days)<br>Number covariates in model: NR |
| Garty 2009                                                               | Number covariates:                                                                                                                   | RBCT (unclear if included)                                       | Mortality in hospital                                                                                                                                                                                                                                                  | Mortality in hospital                                                                                                                                                                                                                                                          | Nature of adjustment: propensity                                                                                                                                                                          |

|                   |                                                                                                                                                           |                                                                                                      |                                                                                                                                                                                                                                                                                          |                                                                                                                                                                                                                                                                                                                                                                                                                                                                 |                                                                                                                                                                               |
|-------------------|-----------------------------------------------------------------------------------------------------------------------------------------------------------|------------------------------------------------------------------------------------------------------|------------------------------------------------------------------------------------------------------------------------------------------------------------------------------------------------------------------------------------------------------------------------------------------|-----------------------------------------------------------------------------------------------------------------------------------------------------------------------------------------------------------------------------------------------------------------------------------------------------------------------------------------------------------------------------------------------------------------------------------------------------------------|-------------------------------------------------------------------------------------------------------------------------------------------------------------------------------|
| (11)              | unclear<br>Age: Yes<br>Sex: Yes<br>Smoking: Yes<br>Co-morbidity: Yes<br>Hb level: Yes<br>Unclear if covariates pre-specified or data driven               | other blood product) versus no RBCT<br><br>Mortality in hospital, 30 days, 1 year and 4 years#       | RBCT: 18/166 (10.8%)<br>No RBCT: 113/2169 (5.2%)<br><br>Mortality 30 days<br>RBCT: 18/166 (11%)<br>No RBCT: 183/2169 (8.5%)<br><br>Mortality 1 year<br>RBCT: 65/166 (39.6%)<br>No RBCT: 616/2169 (28.5%)<br><br>Mortality 4 years<br>RBCT: 114/166 (69.5%)<br>No RBCT: 1284/2169 (59.5%) | RBCT: 9/103 (8.7%)<br>No RBCT: 15/103 (14.6%)<br>Hazard ratio: 0.48 (95% CI 0.21 to 1.11)<br><br>Mortality 30 days<br>RBCT: 10/103 (9.7%)<br>No RBCT: 19/103 (18.4%)<br>Hazard ratio: 0.29 (95% CI 0.13 to 0.64)<br><br>Mortality 1 year<br>RBCT: 40/103 (38.8%)<br>No RBCT: 44/103 (42.7%)<br>Hazard ratio: 0.74 (95% CI 0.50 to 1.09)<br><br>Mortality 4 years<br>RBCT: 75/103 (72.8%)<br>No RBCT: 79/103 (76.7%)<br>Hazard ratio: 0.86 (95% CI 0.64 to 1.14) | score<br>Type of model used: Cox proportional hazard modelling (1-4 year mortality) and logistic regression (mortality up to 30 days)<br>Number covariates in model: 9        |
| Jani 2007 (12)    | Number covariates: 31<br>Age: yes<br>Sex: yes<br>Smoking: yes<br>Co-morbidity: yes<br>HB level: yes<br>Unclear if covariates pre-specified or data driven | RBCT and other blood product versus no RBCT<br><br>Mortality in hospital                             | RBCT: 150/1033<br>No RBCT: 108/3590<br>p<0.001<br>(only p value reported)                                                                                                                                                                                                                | RBCT: 76/598<br>No RBCT: 44/598<br>Odds ratio 2.02 (95% CI 1.47 to 2.79)                                                                                                                                                                                                                                                                                                                                                                                        | Nature of adjustment: transfusion propensity and co morbidities<br>Type of model used: logistic regression<br>Number covariate in model: 10                                   |
| Johnson 2006 (13) | Number covariates: 7<br>Age: yes<br>Sex: yes<br>Smoking: no<br>Co-morbidity: no<br>HB level: yes<br>Unclear if covariates pre-specified or data driven    | RBCT (unclear if included other blood product) versus no RBCT<br><br>Mortality at 30, 120, 365 days# | Mortality 30 days<br>RBCT: 95/1068<br>No RBCT: 181/2503<br>p=0.10<br><br>Mortality 120 days<br>RBCT: 247/1068<br>No RBCT: 374/2503<br>p<0.0001<br><br>Mortality 365 days                                                                                                                 | Mortality 30 days (not reported)<br><br>Mortality 120 days (not reported)<br><br>Mortality 365 days                                                                                                                                                                                                                                                                                                                                                             | Nature of adjustment: age, sex, ASA grade, preoperative haemoglobin, residential status, mobility score<br>Type of model used: Cox regression<br>Number covariate in model: 7 |

|                    |                                                                                                                                    |                                                                          |                                                                             |                                                                                                                                                                                                                                                        |                                                                                                                                                                  |
|--------------------|------------------------------------------------------------------------------------------------------------------------------------|--------------------------------------------------------------------------|-----------------------------------------------------------------------------|--------------------------------------------------------------------------------------------------------------------------------------------------------------------------------------------------------------------------------------------------------|------------------------------------------------------------------------------------------------------------------------------------------------------------------|
|                    |                                                                                                                                    |                                                                          | RBCT : 381/1068<br>No RBCT: 626/2503<br>p<0.001<br>(only p values reported) | RBCT: 381/1068<br>No RBCT: 626/2503<br>Hazard ratio 1.11 (95% CI 0.96 to 1.29)                                                                                                                                                                         |                                                                                                                                                                  |
| Khorana 2008 (14)  | Number covariates: Unclear<br>Age: yes<br>Sex: yes<br>Smoking: no<br>Co-morbidity: yes<br>HB level: no<br>Covariates pre-specified | RBCT and other blood product versus no RBCT<br><br>Mortality in hospital | RBCT (n): 11.9%<br>No RBCT (n): NR                                          | RBCT (n): NR<br>No RBCT (n): NR<br>Odds ratio 1.34 (95% 1.29 to 1.38)                                                                                                                                                                                  | Nature of adjustment: NR<br>Type of model used: multivariate logistic regression<br>Number covariate in model: NR                                                |
| Murphy 2007 (17)   | Number covariates: 21<br>Age: yes<br>Sex: yes<br>Smoking: yes<br>Co-morbidity: yes<br>HB level: yes<br>Covariates pre-specified    | RBCT versus no RBCT<br><br>Mortality up to 7 years post surgery#         | Not reported                                                                | Mortality 0 - 30 days<br>RBCT (n): NR<br>No RBCT (n): NR<br>Hazard ratio 6.69( 95% CI 3.66 to 15.1)<br><br>Mortality 31 days to 1 year<br>Hazard ratio 2.59 (95% CI 1.68 to 4.18)<br><br>Mortality > 1 year<br>Hazard ratio 1.32 (95% CI 1.08 to 1.64) | Nature of adjustment: transfusion propensity<br>Type of model used: logistic regression and Cox proportional hazards regression<br>Number covariate in model: NR |
| Pederson 2009 (19) | Number covariates: 69<br>Age: yes<br>Sex: yes<br>Smoking: no<br>Co-morbidity: yes<br>HB level: yes<br>Covariates pre-specified     | RBCT versus no RBCT<br><br>Mortality at 90 day                           | RBCT (n): NR<br>No RBCT (n): NR<br>Odds ratio 2.17 (95% CI 1.24 to 3.79)    | RBCT: 39/2254<br>No RBCT: 18/2254<br>Odds ratio 2.17 (95% CI 1.24 to 3.80)                                                                                                                                                                             | Nature of adjustment: transfusion propensity<br>Type of model used: multivariate logistic regression<br>Number covariate in model: NR                            |
| Rogers 2006 (20)   | Number covariates: 33<br>Age: yes<br>Sex: yes<br>Smoking: no<br>Co-morbidity: yes<br>HB level: unclear                             | RBCT versus no RBCT<br><br>Mortality within 100 days                     | RBCT: 648/6893<br>No RBCT: 44/2325<br>Odds ratio 6.6 (95% CI 4.4 to 9.9)    | RBCT: 648/6893<br>No RBCT: 44/2325<br>Odds ratio 5.6 (95% CI 3.7 to 8.6)                                                                                                                                                                               | Nature of adjustment: sex, age, race, co morbidity, urgency of admission<br>Type of model used: generalised linear regression<br>Number covariate in model: 5    |

|                       |                                                                                                                                                         |                                                                                            |                                                                               |                                                                                                                                                                                                                                                                                                                                           |                                                                                                                                                                               |
|-----------------------|---------------------------------------------------------------------------------------------------------------------------------------------------------|--------------------------------------------------------------------------------------------|-------------------------------------------------------------------------------|-------------------------------------------------------------------------------------------------------------------------------------------------------------------------------------------------------------------------------------------------------------------------------------------------------------------------------------------|-------------------------------------------------------------------------------------------------------------------------------------------------------------------------------|
|                       | Unclear if covariates pre-specified or data driven                                                                                                      |                                                                                            |                                                                               |                                                                                                                                                                                                                                                                                                                                           |                                                                                                                                                                               |
| Rogers 2009 (21)      | Number covariates: 13<br>Age: yes<br>Sex: yes<br>Smoking: no<br>Co-morbidity: yes<br>HB level: no<br>Unclear if covariates pre-specified or data driven | RBCT and other blood product versus no RBCT<br><br>Mortality in hospital and at 30 days    | Not reported                                                                  | Mortality in hospital<br>RBCT (n): NR<br>No RBCT (n): NR<br>Elective surgery: Odds ratio 4.67 (95% CI 2.38 to 9.18)<br>Urgent surgery: Odds ratio 1.82 (95% CI 1.51 to 2.20)<br><br>Mortality 30 days post discharge<br>Elective surgery: Odds ratio 2.88 (95% CI 1.38 to 5.98)<br>Urgent surgery: Odds ratio 4.65 (95% CI 1.90 to 11.39) | Nature of adjustment: propensity score, surgical volume, hospital volume<br>Type of model used: multivariate mixed effect logistic regression<br>Number covariate in model: 3 |
| Salehiomran 2009 (22) | Number covariates: 31<br>Age: yes<br>Sex: yes<br>Smoking: yes<br>Co-morbidity: yes<br>HB level: yes<br>Covariates pre-specified                         | RBCT (unclear if included other blood products) versus no RBCT<br><br>Mortality at 30 days | RBCT: 60/2333<br>No RBCT: 42/11773<br>p<0.001<br>(Odds ratio not reported)    | RBCT: 60/2333<br>No RBCT: 42/11773<br>Odds ratio 3.98 (95% CI 2.44 to 6.47)                                                                                                                                                                                                                                                               | Nature of adjustment: not reported<br>Type of model used: multivariate logistic regression<br>Number covariate in model: 13                                                   |
| Stone 2008 (23)       | Number covariates: 7<br>Age: yes<br>Sex: yes<br>Smoking: N/A<br>Co-morbidity: yes<br>Hb level: no<br>Unclear if covariates pre-specified or data driven | RBCT versus no RBCT<br><br>Mortality in hospital                                           | RBCT: 31/106<br>No RBCT: 42/1533<br>Odds ratio 14.67<br>(95% CI not reported) | Not reported<br>(authors said statistical model was to unreliable to provide reliable conclusions)                                                                                                                                                                                                                                        | Nature of adjustment: injury severity<br>Type of model used: logistic regression<br>Number covariate in model: NR                                                             |
| Weinberg 2008 (28)    | Number covariates: 9<br>Age: yes<br>Sex: yes<br>Smoking: no<br>Co-morbidity: no<br>Hb level: no<br>Unclear if covariates pre-specified or data driven   | RBCT versus no RBCT<br><br>Mortality in hospital                                           | RBCT (n): 4.2%<br>No RBCT (n): 2.3%<br>p=0.04                                 | RBCT (n): NR<br>No RBCT (n): NR<br>Odds ratio 0.96 (95% CI 0.48 to 1.94)                                                                                                                                                                                                                                                                  | Nature of adjustment: age, gender, ISS, injury, ventilation, transfusion volume<br>Type of model used: logistic regression<br>Number of covariates in model: 5                |

|                                                                     |                                                                                                                                                                 |                                                                           |                                                                                                                                                                                                   |                                                                                                                                                                                                                                              |                                                                                                                                                                                     |
|---------------------------------------------------------------------|-----------------------------------------------------------------------------------------------------------------------------------------------------------------|---------------------------------------------------------------------------|---------------------------------------------------------------------------------------------------------------------------------------------------------------------------------------------------|----------------------------------------------------------------------------------------------------------------------------------------------------------------------------------------------------------------------------------------------|-------------------------------------------------------------------------------------------------------------------------------------------------------------------------------------|
| Wu 2010 (29)                                                        | Number covariates: multiple<br>Age: yes<br>Sex: yes<br>Smoking: yes<br>Co-morbidity: yes<br>Hb level: yes<br>Unclear if covariates pre-specified or data driven | RBCT versus no RBCT<br><br>Mortality at 30 days                           | Not reported                                                                                                                                                                                      | RBCT (n): NR<br>No RBCT (n): NR<br>Odds ratio 1.37 (95% CI 1.27 to 1.48)                                                                                                                                                                     | Nature of adjustment: mean operative time, ASA classification, rate of general anaesthesia<br>Type of model used: logistic regression<br>Number covariates in model: NR             |
| Zilberberg 2008 (30)                                                | Number covariates: multiple<br>Age: yes<br>Sex: yes<br>Smoking: no<br>Co-morbidity: yes<br>Hb level: yes<br>Covariates pre-specified                            | RBCT versus no RBCT<br><br>Mortality in hospital                          | RBCT: 938/2912<br>No RBCT: 342/1432<br>Odds ratio 1.51 (95% CI 1.31 to 1.75)                                                                                                                      | RBCT : 938/2912<br>No RBCT: 342/1432<br>Odds ratio 1.21 (95% CI 1.00 to 1.48)                                                                                                                                                                | Nature of adjustment: multiple variables<br>Type of model used: logistic regression<br>Number covariates in model: 13                                                               |
| <b>Volume 'A' red blood cells versus volume 'B' red blood cells</b> |                                                                                                                                                                 |                                                                           |                                                                                                                                                                                                   |                                                                                                                                                                                                                                              |                                                                                                                                                                                     |
| Bernard 2009 (31)                                                   | Number covariates: multiple<br>Age: Yes<br>Sex: Yes<br>Smoking: Yes<br>Co-morbidity: Yes<br>Hb level: Yes<br>Covariates pre-specified                           | Volume of RBCT versus another volume of RBCT<br><br>Mortality at 30 days  | Intra operative<br>1 unit: 136/1343<br>2 units: 194/1903<br>3-4 units: 151/977<br>5-9 units: 67/412<br>>10 units: 45/153<br><br>Post operative<br>>4 units: 153/575<br>(Odds ratios not reported) | Intra operative<br>1 unit: Odds ratio 1.32<br>2 units: Odds ratio 1.38<br>3-4 units: Odds ratio 1.97<br>5-9 units: Odds ratio 2.17<br>>10 units: Odds ratio 9.83<br><br>Post operative<br>>4 units: Odds ratio 2.65<br>(95% CI not reported) | Nature of adjustment: transfusion propensity, type of procedure, wound class, operative duration<br>Type of model used: logistic regression<br>Number covariates in model: multiple |
| Charles 2007 (32)                                                   | Number covariates: 7<br>Age: Yes<br>Sex: Yes<br>Smoking: No<br>Co-morbidity: Yes<br>Hb level: No<br>Covariates pre-specified                                    | Volume of RBCT versus another volume of RBCT<br><br>Mortality at 24 hours | 0 RBCT: 1.8%<br>1-2 units: 6.5%<br>3-5 units: 16.1%<br>≥6 units: 29.8%<br>(Odds ratios not reported)                                                                                              | 1-2 units: p=0.18<br>3-5 units: Odds ratio 3.22 p=0.002<br>≥6 units: Odds ratio 4.87 p=0.000<br>(95% CI not reported)                                                                                                                        | Nature of adjustment: age, gender, ISS score, SI<br>Type of model used: logistic regression<br>Number covariates in model: 4                                                        |

|                                                              |                                                                                                                                     |                                                                                                                                                |                                                                                |                                                                                                                                                                                                                                                                                                                                                                                                                                        |                                                                                                                                                                                                                      |
|--------------------------------------------------------------|-------------------------------------------------------------------------------------------------------------------------------------|------------------------------------------------------------------------------------------------------------------------------------------------|--------------------------------------------------------------------------------|----------------------------------------------------------------------------------------------------------------------------------------------------------------------------------------------------------------------------------------------------------------------------------------------------------------------------------------------------------------------------------------------------------------------------------------|----------------------------------------------------------------------------------------------------------------------------------------------------------------------------------------------------------------------|
| O'Keeffe 2010 (33)                                           | Number covariates: 23<br>Age: yes<br>Sex: yes<br>Smoking: unclear<br>Co-morbidity: yes<br>HB level: yes<br>Covariates pre-specified | Volume of RBCT versus another volume of RBCT<br><br>Mortality at 30 days                                                                       | Not reported                                                                   | 1-2 units: Odds ratio 1.92 (95% CI 1.36 to 2.70)<br>>3 units: Odds ratio 2.48 (95% CI 1.55 to 3.98)                                                                                                                                                                                                                                                                                                                                    | Nature of adjustment: transfusion propensity<br>Type of model used: logistic regression<br>Number covariate in model: 19                                                                                             |
| Ruttinger 2007 (34)                                          | Number covariates: 14<br>Age: yes<br>Sex: yes<br>Smoking: no<br>Co-morbidity: yes<br>HB level: yes<br>Covariates pre-specified      | Volume of RBCT versus another volume of RBCT<br><br>Mortality in hospital                                                                      | % reported in figure only (Odds ratios not reported)                           | 1-2 units: Odds ratio 0.68 (95% CI 0.35 to 1.28)<br>3-4 units: Odds ratio 1.11 (95% CI 0.52 to 2.39)<br>5-8 units: Odds ratio 1.16 (95% CI 0.60 to 2.26)<br>8 units: Odds ratio 0.74 (95% CI 0.36 to 1.51)                                                                                                                                                                                                                             | Nature of adjustment: extended analysis<br>Type of model used: logistic regression<br>Number covariate in model: NR                                                                                                  |
| Weightman 2009 (35)                                          | Number covariates: 16<br>Age: yes<br>Sex: yes<br>Smoking: no<br>Co-morbidity: yes<br>Hb level: yes<br>Covariates pre-specified      | Volume of RBCT and other blood product (classified as: 0 units, 1-2 units, 3-6 units and > 6units)<br><br>Mortality (mean follow up 8.1 years) | 0 units: 80/779<br>1-2 units: 56/402<br>3-6 units: 58/333<br>> 6 units: 72/327 | 1-2 units: Hazard ratio 1.00 (95% CI 0.70 to 1.44)<br>3-6 units: Hazard ratio 0.98 (95% CI 0.67 to 1.41)<br>> 6 units: Hazard ratio 1.25 (95% CI 0.87 to 1.79)                                                                                                                                                                                                                                                                         | Nature of adjustment: multiple measures<br>Type of model used: Cox proportional hazard model<br>Number covariates in model: 12                                                                                       |
| <b>'Older red blood cells versus 'newer' red blood cells</b> |                                                                                                                                     |                                                                                                                                                |                                                                                |                                                                                                                                                                                                                                                                                                                                                                                                                                        |                                                                                                                                                                                                                      |
| Edgren 2010 (36)                                             | Number covariates: unclear<br>Age: Yes<br>Sex: Yes<br>Smoking: No<br>Co-morbidity: Yes<br>Hb level: No<br>Covariates pre-specified  | RBCT storage for 0- days, 10-19 days, 20-29 and 30-42 days<br><br>Mortality ≤ 7 days and mortality 8 to 730 days#                              | Not reported                                                                   | Mortality 1 to 7 days<br>Stored 0- 9 days: Hazard ratio 0.96 (95% CI 0.91 to 1.00)<br>Stored 10-19 days: Hazard ratio 1.00 (95% CI not reported)<br>Stored 20-29 days: Hazard ratio 1.06 (95% CI 0.96 to 1.06)<br>Stored 30-42 days: Hazard ratio 1.05 (95% CI 0.97 to 1.12)<br><br>Mortality 8 to 730 days<br>Stored 0- 9 days: Hazard ratio 1.01 (95% CI 0.99 to 1.02)<br>Stored 10-19 days: Hazard ratio 1.00 (95% CI not reported) | Nature of adjustment: number transfusions, age, sex, blood group, calendar period, season, weekday, hospital, indication<br>Type of model used: Cox proportional hazards regression<br>Number covariates in model: 9 |

|                           |                                                                                                                                       |                                                                                                       |                                                                                                                                                |                                                                                                                                                                                                                                                           |                                                                                                                                                                                                  |
|---------------------------|---------------------------------------------------------------------------------------------------------------------------------------|-------------------------------------------------------------------------------------------------------|------------------------------------------------------------------------------------------------------------------------------------------------|-----------------------------------------------------------------------------------------------------------------------------------------------------------------------------------------------------------------------------------------------------------|--------------------------------------------------------------------------------------------------------------------------------------------------------------------------------------------------|
|                           |                                                                                                                                       |                                                                                                       |                                                                                                                                                | Stored 20-29 days: Hazard ratio 0.99 (95% CI 0.97 to 1.01)<br>Stored 30-42 days: Hazard ratio 1.05 (95% CI 1.02 to 1.08)                                                                                                                                  |                                                                                                                                                                                                  |
| Koch 2008 (37)            | Number covariates: multiple<br>Age: yes<br>Sex: yes<br>Smoking: yes<br>Co-morbidity: yes<br>Hb level: yes<br>Covariates pre-specified | RBCT stored for ≤ 14 days versus RBCT stored for > 14 days<br><br>Mortality in hospital and at 1 year | Mortality in hospital<br>Stored ≤ 14 days: 49/2872<br>Stored > 14 days: 88/3130<br>p=0.004<br>(only p value reported)                          | Mortality at 1 year<br>Stored ≤ 14 days: 7.4%<br>Stored > 14 days: 11%<br>p<0.001<br>(only p value reported)                                                                                                                                              | Nature of adjustment: transfusion propensity<br>Type of model used: logistic regression<br>Number covariate in model: NR                                                                         |
| Van de Watering 2006 (38) | Number covariates: 7<br>Age: yes<br>Sex: yes<br>Smoking: no<br>Co-morbidity: yes<br>Hb level: yes<br>Covariates pre-specified         | RBCT stored for <18 days versus RBCT stored for >18 days<br><br>Mortality at 30 days#                 | Stored <18 days (n): NR<br>Hazard ratio 1.33 (95% CI 1.04 to 1.68)<br><br>Stored > 18 days (n): NR<br>Hazard ratio: 0.85 (95% CI 0.69 to 1.05) | Stored <18 days (n): NR<br>Hazard ratio 0.93 (95% CI 0.71 to 1.23)<br><br>Stored > 18 days (n): NR<br>Hazard ratio 0.98 (95% CI 0.76 to 1.25)                                                                                                             | Nature of adjustment: number of transfusions, duration of surgery, previous CABG, number of distal anatomises, age, sex, Hb level<br>Type of model used: NR<br>Number covariates in model: 7     |
| Weinberg 2008 (39)        | Number covariates: 6<br>Age: yes<br>Sex: yes<br>Smoking: no<br>Co-morbidity: no<br>Hb level: no<br>Covariates pre-specified           | RBCT stored for <14 days versus RBCT stored for >14 days<br><br>Mortality (time period not specified) | Not reported                                                                                                                                   | Stored <14 days:<br>1-2 units: Odds ratio 1.65 (95% CI 1.01 to 2.70)<br>≥ 3 units: Odds ratio 1.70 (95% CI 0.96 to 2.99)<br><br>Stored ≥ 14 days:<br>1-2 units: Odds ratio 1.78 (95% CI 1.06 to 2.98)<br>≥ 3 units: Odds ratio 2.78 (95% CI 1.58 to 4.88) | Nature of adjustment: age, gender, ISS, type injury, number units transfused first 24 hours, length of hospital stay<br>Type of model used: logistic regression<br>Number covariates in model: 6 |

RBCT=red blood cell transfusion; NR: not reported; OR = odds ratio; RR = risk ratio; HR = hazard ratio; #time-to-event outcome

## APPENDIX 54: Summary of unadjusted and adjusted results of the included studies

| Study ID                                                               | Disease area    | Comparison                                  | Mortality                 | Unadjusted results                                                                                               | Adjusted result                                                                                                   |
|------------------------------------------------------------------------|-----------------|---------------------------------------------|---------------------------|------------------------------------------------------------------------------------------------------------------|-------------------------------------------------------------------------------------------------------------------|
| <b>Red blood cells versus no red blood cells – prospective studies</b> |                 |                                             |                           |                                                                                                                  |                                                                                                                   |
| Aronson 2008 (7)                                                       | Cardiac surgery | RBCT versus no RBCT                         | 6 months                  | HR 4.4 (95% CI 3.2 to 5.9)                                                                                       | HR 1.9 (95% CI 1.3 to 2.9)                                                                                        |
| Bochicchio 2008 (8)                                                    | Trauma          | RBCT and other blood product versus no RBCT | Time period not specified | OR 2.54 (95% CI 1.70 to 3.81)*                                                                                   | OR 1.05 (95% CI 1.03 to 1.07)                                                                                     |
| Koch 2006 (15,16)                                                      | Cardiac surgery | RBCT versus no RBCT                         | In hospital               | OR 1.78 (95% CI 1.70 to 1.87)                                                                                    | OR 1.77 (1.67 to 1.87)                                                                                            |
| Nikolsky 2009 (18)                                                     | Cardiac surgery | RBCT versus no RBCT                         | 30 days and 1 year        | Not reported                                                                                                     | Mortality at 30 days<br>HR 4.71(95% CI 1.97 to 11.26)<br><br>Mortality at 1 year<br>HR 3.16 (95% CI 1.66 to 6.03) |
| Surgenor 2009 (24)                                                     | Cardiac surgery | RBCT versus no RBCT                         | ≤ 5 years                 | HR 1.94 (95% CI 1.71 to 2.20)                                                                                    | HR 1.16 (95% CI 1.01 to 1.33)                                                                                     |
| Taylor 2006 (25)                                                       | Intensive care  | RBCT versus no RBCT                         | Time period not specified | OR 2.47 (95% CI 1.88 to 3.26)*                                                                                   | POS ≤ 25% p=0.88<br>POS 25% ≤ 50% p=0.013<br>POS 50% ≤ 75% p<0.0001<br>POS >75% p=0.14                            |
| Van Straten 2010 (26)                                                  | Cardiac surgery | RBCT versus no RBCT                         | ≤ 30 days and > 30 days   | Mortality ≤ 30 days<br>HR 1.31 (95% CI 1.27 to 1.35)<br><br>Mortality > 30 days<br>HR 1.16 (95% CI 1.13 to 1.20) | Mortality ≤ 30 days<br>HR 1.21 (95% CI 1.13 to 1.30)<br><br>Mortality > 30 days<br>HR 1.04 (95% CI 0.99 to 1.07)  |
| Vincent 2008 (27)                                                      | Intensive care  | RBCT versus no RBCT                         | 30 days in hospital       | OR 1.64 (95% CI 1.38 to 1.94)*                                                                                   | HR 0.89 (95% CI 0.76 to 1.05)                                                                                     |



| Red blood cells versus no red blood cells – retrospective studies |                              |                                                      |                                          |                                                                                                                                                                                                                                                          |                                                                                                                                                                                                                                                      |
|-------------------------------------------------------------------|------------------------------|------------------------------------------------------|------------------------------------------|----------------------------------------------------------------------------------------------------------------------------------------------------------------------------------------------------------------------------------------------------------|------------------------------------------------------------------------------------------------------------------------------------------------------------------------------------------------------------------------------------------------------|
| Engoren 2009 (9)                                                  | Intensive care               | RBCT versus no RBCT                                  | 30 and 180 days                          | Mortality 30 days<br>OR 1.94 (95% CI 1.50 to 2.52)*<br><br>Mortality 180 days<br>OR 1.99 (95% CI 1.58 to 2.50)*                                                                                                                                          | Mortality 30 days<br>HR 1.11 (95% CI 0.86 to 1.42)<br><br>Mortality 180 days<br>HR 1.14 (95% CI 0.83 to 1.58)                                                                                                                                        |
| Engoren 2009 (10)                                                 | Cardiac surgery              | RBCT versus no RBCT                                  | ≤ 30 days and >30 days                   | Mortality ≤30 days<br>Valve only:<br>OR 1.65 (95% CI 0.88 to 3.08)*<br>CABG and valve:<br>OR 5.28 (95% CI 2.95 to 9.47)*<br><br>Mortality >30 days<br>Valve only:<br>RR 0.97 (95% CI 0.79 to 1.18)*<br>CABG and valve:<br>RR 2.47 (95% CI 2.03 to 3.00)* | Mortality ≤30 days<br>Valve only:<br>OR 1.95 (95% CI 0.97 to 3.91)<br>CABG and valve:<br>OR 2.23 (95% CI 1.12 to 4.46)<br><br>Mortality >30 days<br>Valve only:<br>RR 1.25 (95% CI 0.97 to 1.61)<br>CABG and valve:<br>RR 1.44 (95% CI 1.13 to 1.84) |
| Garty 2009 (11)                                                   | Cardiac surgery              | RBCT (unclear if other blood product) versus no RBCT | In hospital, 30 days, 1 year and 4 years | Mortality in hospital<br>OR 0.77 (95% CI 0.46 to 1.31)*<br><br>Mortality 30 days<br>OR 2.21 (95% CI 1.31 to 3.74)*<br><br>Mortality 1 year<br>OR 1.62 (95% CI 1.17 to 2.25)*<br><br>Mortality 4 years<br>OR 1.51 (95% CI 1.08 to 2.12)*                  | Mortality in hospital<br>HR 0.48 (95% CI 0.21 to 1.11)<br><br>Mortality 30 days<br>HR 0.29 (95% CI 0.13 to 0.64)<br><br>Mortality 1 year<br>HR 0.74 (95% CI 0.50 to 1.09)<br><br>Mortality 4 years<br>HR 0.86 (95% CI 0.64 to 1.14)                  |
| Jani 2007 (12)                                                    | Cardiac surgery              | RBCT and other blood product versus no RBCT          | In hospital                              | OR 5.48 (95% CI 4.23 to 7.09)*                                                                                                                                                                                                                           | OR 2.02 (95% CI 1.47 to 2.79)                                                                                                                                                                                                                        |
| Johnson 2006 (13)                                                 | Hip fracture and replacement | RBCT (unclear if other blood product) versus no RBCT | 30 days, 120 days, 365 days              | Mortality 30 days<br>OR 1.84 (95% CI 1.42 to 2.38)*<br><br>Mortality 120 days<br>OR 1.71 (95% CI 1.43 to 2.05)*                                                                                                                                          | Mortality 365 days<br>HR 1.11 (95% CI 0.96 to 1.29)                                                                                                                                                                                                  |

|                          |                                 |                                                         |                         |                                                      |                                                                                                                                                                                                                                                                                    |
|--------------------------|---------------------------------|---------------------------------------------------------|-------------------------|------------------------------------------------------|------------------------------------------------------------------------------------------------------------------------------------------------------------------------------------------------------------------------------------------------------------------------------------|
|                          |                                 |                                                         |                         | Mortality 365 days<br>OR 1.66 (95% CI 1.42 to 1.94)* |                                                                                                                                                                                                                                                                                    |
| Khorana 2008<br>(14)     | Oncology                        | RBCT and other blood product<br>versus no RBCT          | In hospital             | Not reported                                         | OR 1.34 (95% 1.29 to 1.38)                                                                                                                                                                                                                                                         |
| Murphy 2007<br>(17)      | Cardiac surgery                 | RBCT versus no RBCT                                     | ≤7 years                | Not reported                                         | Mortality 0 - 30 days<br>HR 6.69 ( 95% CI 3.66 to 15.1)<br><br>Mortality 31 days to 1 year<br>HR 2.59 (95% CI 1.68 to 4.18)<br><br>Mortality > 1 year<br>HR 1.32 (95% CI 1.08 to 1.64)                                                                                             |
| Pederson 2009<br>(19)    | Hip fracture and<br>replacement | RBCT versus no RBCT                                     | 90 day                  | OR 2.17 (95% CI 1.24 to 3.79)                        | OR 2.17 (95% CI 1.24 to 3.80)                                                                                                                                                                                                                                                      |
| Rogers 2006<br>(20)      | Cardiac surgery                 | RBCT versus no RBCT                                     | ≤100 days               | OR 6.6 (95% CI 4.4 to 9.9)                           | OR 5.6 (95% CI 3.7 to 8.6)                                                                                                                                                                                                                                                         |
| Rogers 2009<br>(21)      | Cardiac surgery                 | RBCT and other blood product<br>versus no RBCT          | In hospital and 30 days | Not reported                                         | Mortality in hospital<br>Elective surgery:<br>OR 4.67 (95% CI 2.38 to 9.18)<br>Urgent surgery:<br>OR 1.82 (95% CI 1.51 to 2.20)<br><br>Mortality 30 days post discharge<br>Elective surgery:<br>OR 2.88 (95% CI 1.38 to 5.98)<br>Urgent surgery:<br>OR 4.65 (95% CI 1.90 to 11.39) |
| Salehiomran<br>2009 (22) | Cardiac surgery                 | RBCT (unclear if other blood<br>product) versus no RBCT | 30 days                 | OR 1.55 (95% CI 1.04 to 2.30)*                       | OR 3.98 (95% CI 2.44 to 6.47)                                                                                                                                                                                                                                                      |
| Stone 2008<br>(23)       | Paediatric trauma               | RBCT versus no RBCT                                     | In hospital             | OR 14.67 (95% CI not reported)                       | Not reported                                                                                                                                                                                                                                                                       |
| Weinberg<br>2008 (28)    | Adult trauma                    | RBCT versus no RBCT                                     | In hospital             | OR 1.89 (95% CI 0.97 to 3.60)*                       | OR 0.96 (95% CI 0.48 to 1.94)                                                                                                                                                                                                                                                      |
| Wu 2010 (29)             | Intensive care                  | RBCT versus no RBCT                                     | 30 days                 | Not reported                                         | OR 1.37 (95% CI 1.27 to 1.48)                                                                                                                                                                                                                                                      |

|                                                                     |                 |                                           |                         |                               |                                                                                                                                                                                                                                                                                                                       |
|---------------------------------------------------------------------|-----------------|-------------------------------------------|-------------------------|-------------------------------|-----------------------------------------------------------------------------------------------------------------------------------------------------------------------------------------------------------------------------------------------------------------------------------------------------------------------|
|                                                                     |                 |                                           |                         |                               |                                                                                                                                                                                                                                                                                                                       |
| Zilberberg 2008 (30)                                                | Intensive care  | RBCT versus no RBCT                       | In hospital             | OR 1.51 (95% CI 1.31 to 1.75) | OR 1.21 (95% CI 1.00 to 1.48)                                                                                                                                                                                                                                                                                         |
| <b>Volume 'A' red blood cells versus volume 'B' red blood cells</b> |                 |                                           |                         |                               |                                                                                                                                                                                                                                                                                                                       |
| Bernard 2009 (31)                                                   | Surgery         | Volume RBCT versus another volume RBCT    | 30 days                 | Not reported                  | Intra operative<br>1 unit:<br>OR 1.32(95% CI not reported)<br>2 units:<br>OR 1.38(95% CI not reported)<br>3-4 units:<br>OR 1.97(95% CI not reported)<br>5-10 units:<br>OR 2.17(95% CI not reported)<br>>10 units:<br>OR 9.83(95% CI not reported)<br><br>Post operative<br>>4 units:<br>OR 2.65 (95% CI not reported) |
| Charles 2007 (32)                                                   | Trauma          | Volume RBCT versus another volume RBCT    | 24 hours                | Not reported                  | 3-5 units:<br>OR 3.22 (95% CI not reported)<br>≥6 units:<br>OR 4.87 (95% CI not reported)                                                                                                                                                                                                                             |
| O'Keeffe 2010 (33)                                                  | Cardiac surgery | Volume RBCT versus another volume RBCT    | 30 days                 | Not reported                  | 1-2 units:<br>OR 1.92 (95% CI 1.36 to 2.70)<br>>3 units:<br>OR 2.48 (95% CI 1.55 to 3.98)                                                                                                                                                                                                                             |
| Ruttinger 2007 (34)                                                 | Intensive care  | Volume RBCT versus another volume of RBCT | In hospital             | Not reported                  | 1-2 units:<br>OR 0.68 (95% CI 0.35 to 1.28)<br>3-4 units:<br>OR 1.11 (95% CI 0.52 to 2.39)<br>5-8 units:<br>OR 1.16 (95% CI 0.60 to 2.26)<br>8 units:<br>OR 0.74 (95% CI 0.36 to 1.51)                                                                                                                                |
| Weightman                                                           | Cardiac surgery | Volume RBCT and other blood               | Mean 8.1 year follow up | Not reported                  | 1-2 units:                                                                                                                                                                                                                                                                                                            |

|                                                              |                 |                                                            |                            |                                                                                                           |                                                                                                                                                                                                                                                                                                                                                                                                                                                                                                            |
|--------------------------------------------------------------|-----------------|------------------------------------------------------------|----------------------------|-----------------------------------------------------------------------------------------------------------|------------------------------------------------------------------------------------------------------------------------------------------------------------------------------------------------------------------------------------------------------------------------------------------------------------------------------------------------------------------------------------------------------------------------------------------------------------------------------------------------------------|
| 2009 (35)                                                    |                 | product versus another volume RBCT                         |                            |                                                                                                           | HR 1.00 (95% CI 0.70 to 1.44)<br>3-6 units:<br>HR 0.98 (95% CI 0.67 to 1.41)<br>> 6 units:<br>HR 1.25 (95% CI 0.87 to 1.79)                                                                                                                                                                                                                                                                                                                                                                                |
| <b>'Older red blood cells versus 'newer' red blood cells</b> |                 |                                                            |                            |                                                                                                           |                                                                                                                                                                                                                                                                                                                                                                                                                                                                                                            |
| Edgren 2010 (36)                                             | Not specified   | RBCT stored for 0- days, 10-19 days, 20-29 and 30-42 days  | ≤ 7 days and 8 to 730 days | Not reported                                                                                              | Mortality 1 to 7 days<br>Stored 0- 9 days:<br>HR 0.96 (95% CI 0.91 to 1.00)<br>Stored 10-19 days:<br>HR 1.00 (95% CI not reported)<br>Stored 20-29 days:<br>HR 1.06 (95% CI 0.96 to 1.06)<br>Stored 30-42 days:<br>HR 1.05 (95% CI 0.97 to 1.12)<br><br>Mortality 8 to 730 days<br>Stored 0- 9 days:<br>HR 1.01 (95% CI 0.99 to 1.02)<br>Stored 10-19 days:<br>HR 1.00 (95% CI not reported)<br>Stored 20-29 days:<br>HR 0.99 (95% CI 0.97 to 1.01)<br>Stored 30-42 days:<br>HR 1.05 (95% CI 1.02 to 1.08) |
| Koch 2008 (37)                                               | Cardiac surgery | RBCT stored for ≤ 14 days versus RBCT stored for > 14 days | In hospital and 1 year     | Mortality in hospital<br>OR 0.60 (95% CI 0.42 to 0.85)*                                                   | Mortality at 1 year<br>p<0.001                                                                                                                                                                                                                                                                                                                                                                                                                                                                             |
| Van de Watering 2006 (38)                                    | Cardiac surgery | RBCT stored for <18 days versus RBCT stored for >18 days   | 30 days                    | Stored <18 days<br>HR 1.33 (95% CI 1.04 to 1.68)<br><br>Stored > 18 days<br>HR 0.85 (95% CI 0.69 to 1.05) | Stored <18 days<br>HR 0.93 (95% CI 0.71 to 1.23)<br><br>Stored > 18 days<br>HR 0.98 (95% CI 0.76 to 1.25)                                                                                                                                                                                                                                                                                                                                                                                                  |
| Weinberg 2008 (39)                                           | Trauma          | RBCT stored for <14 days versus RBCT stored for >14 days   | Time period not specified  | Not reported                                                                                              | Stored <14 days<br>1-2 units:<br>OR 1.65 (95% CI 1.01 to 2.70)                                                                                                                                                                                                                                                                                                                                                                                                                                             |

1  
2  
3  
4  
5  
6  
7  
8  
9  
10  
11  
12  
13  
14  
15  
16  
17  
18  
19  
20  
21  
22  
23  
24  
25  
26  
27  
28  
29  
30  
31  
32  
33  
34  
35  
36  
37  
38  
39  
40  
41  
42  
43  
44  
45  
46  
47  
48  
49

|  |  |  |  |  |                                                                 |
|--|--|--|--|--|-----------------------------------------------------------------|
|  |  |  |  |  | ≥ 3 units:<br>OR 1.70 (95% CI 0.96 to 2.99)                     |
|  |  |  |  |  | Stored ≥ 14 days<br>1-2 units:<br>OR 1.78 (95% CI 1.06 to 2.98) |
|  |  |  |  |  | ≥ 3 units:<br>OR 2.78 (95% CI 1.58 to 4.88)                     |

RBCT=red blood cell transfusion; \*calculated from raw data; OR = odds ratio; RR = risk ratio; HR = hazard ratio

For peer review only
